# Supplementary material for: A Novel Molecular Signature of Cancer-Associated Fibroblasts Predicts Prognosis and Immunotherapy Response in Pancreatic Cancer
Source: Int J Mol Sci. 2022 Dec 21;24(1):156. doi: 10.3390/ijms24010156 (PMC9820557; doi:10.3390/ijms24010156)
Supplement: Supplementary file 1 [file ijms-24-00156-s001.zip]

Archive with 4 entries (4 files):
- supplemental figure S1.png
- Supplemental figure S2.jpg
- Supplemental Table.xlsx
- Supplementary figure and table legends.pdf
