# Supplementary material for: A Novel Molecular Signature of Cancer-Associated Fibroblasts Predicts Prognosis and Immunotherapy Response in Pancreatic Cancer
Source: Int J Mol Sci. 2022 Dec 21;24(1):156. doi: 10.3390/ijms24010156 (PMC9820557; doi:10.3390/ijms24010156)
Supplement: Supplementary file 1 [file ijms-24-00156-s001.zip › Supplemental Table.xlsx]

## Sheet: Table S1
id	futime	fustat	α-SMA IHC score
1	2.16667	0	CAF cells low
2	1.58333	0	CAF cells high
3	0.5	1	CAF cells low
4	0.833333	1	CAF cells high
5	1.66667	0	CAF cells low
6	3.08333	0	CAF cells low
7	0.75	0	CAF cells high
8	1.75	0	CAF cells high
9	0.666667	1	CAF cells high
10	2.16667	0	CAF cells low
11	3.08333	0	CAF cells low
12	1.33333	0	CAF cells low
13	0.75	0	CAF cells high
14	3	1	CAF cells high
15	0.416667	1	CAF cells high
16	0.5	0	CAF cells high
17	1.25	0	CAF cells high
18	1.58333	0	CAF cells high
19	1.16667	1	CAF cells high
20	1.83333	0	CAF cells high
21	1.83333	0	CAF cells high
22	3.66667	0	CAF cells high
23	1.66667	1	CAF cells low
24	1.41667	0	CAF cells high
25	1	1	CAF cells high
26	3.16667	1	CAF cells high
27	0.916667	0	CAF cells low
28	2.91667	0	CAF cells high
29	3.58333	0	CAF cells low
30	0.666667	1	CAF cells low
31	0.583333	1	CAF cells high
32	1.83333	1	CAF cells high
33	3.41667	1	CAF cells high
34	0.25	1	CAF cells high
35	2.83333	1	CAF cells high
36	0.25	0	CAF cells high
37	1.91667	0	CAF cells high
38	2	0	CAF cells high
39	0.5	1	CAF cells high
40	3.41667	1	CAF cells high
41	0.416667	1	CAF cells high
42	2	0	CAF cells low
43	1.83333	0	CAF cells low
44	0.5	0	CAF cells low
45	0.416667	1	CAF cells high
46	3.58333	0	CAF cells high
47	0.75	0	CAF cells high
48	1.5	1	CAF cells high
49	0	1	CAF cells high
50	3.16667	0	CAF cells high
51	0.75	1	CAF cells high
52	3.08333	0	CAF cells low
53	3.08333	0	CAF cells high
54	0.25	1	CAF cells low
55	1.66667	0	CAF cells low
56	0.333333	1	CAF cells high
57	0.75	0	CAF cells low
58	1.83333	0	CAF cells high
59	1.58333	0	CAF cells low
60	1.25	0	CAF cells high
61	0.416667	0	CAF cells high
62	1.66667	0	CAF cells low
63	1	1	CAF cells high
64	1.08333	0	CAF cells low
65	2.91667	0	CAF cells high
66	1.83333	0	CAF cells high
67	1	1	CAF cells high
68	1.08333	1	CAF cells high
69	3.25	1	CAF cells low
70	3.25	1	CAF cells high
71	3.25	1	CAF cells low
72	3.16667	1	CAF cells high
73	2.83333	1	CAF cells low
74	0.5	0	CAF cells low
75	0.416667	0	CAF cells low
76	1.83333	0	CAF cells high
77	1.75	0	CAF cells low
78	1.75	0	CAF cells low
79	3.58333	0	CAF cells low
80	3.25	1	CAF cells high
81	3.08333	1	CAF cells low
82	3.16667	0	CAF cells low
83	3.58333	0	CAF cells low
84	2.08333	0	CAF cells low
85	1.66667	0	CAF cells high
86	1.41667	1	CAF cells high
87	3.41667	0	CAF cells high
88	3.41667	1	CAF cells high
89	3.16667	1	CAF cells high
90	3.08333	1	CAF cells high
91	2.91667	0	CAF cells high

## Sheet: Table S2
id	futime	fustat	gender	age	grade	T	N	M	stage	site	primary_therapy_outcome_success	disease_type
TCGA-3A-A9IO-01A	1942	0	male	55	G1	TX	NX	MX	not reported	Body of pancreas		Adenomas and Adenocarcinomas
TCGA-US-A774-01A	695	1	female	76	G3	T3	N1	MX	stage IIB	Head of pancreas		Ductal and Lobular Neoplasms
TCGA-HZ-A49H-01A	491	0	female	68	G2	T3	N1	MX	stage IIB	Head of pancreas	Complete Remission/Response	Ductal and Lobular Neoplasms
TCGA-FB-A4P5-01A	179	1	female	69	G2	T3	N1	MX	stage IIB	Head of pancreas		Ductal and Lobular Neoplasms
TCGA-FB-AAPS-01A	228	0	female	62	G2	T2	N1	MX	stage IIB	Head of pancreas		Ductal and Lobular Neoplasms
TCGA-3A-A9IN-01A	2084	0	female	62	G2	T2	NX	MX	stage IB	Body of pancreas	Complete Remission/Response	Adenomas and Adenocarcinomas
TCGA-HV-A5A5-01A	289	0	female	61	G2	T3	N1	M0	stage IIB	Head of pancreas		Ductal and Lobular Neoplasms
TCGA-H6-8124-01A	392	0	female	56	G3	T3	N1	M0	stage IIB	Head of pancreas	Complete Remission/Response	Adenomas and Adenocarcinomas
TCGA-US-A77G-01A	12	1	male	64	G2	T3	N1	MX	stage IIB	Head of pancreas		Ductal and Lobular Neoplasms
TCGA-3A-A9IJ-01A	1854	0	male	65	G1	T2	N0	MX	stage IB	Head of pancreas	Complete Remission/Response	Adenomas and Adenocarcinomas
TCGA-HZ-A8P0-01A	0	0	male	76	G1	T3	N1	MX	stage IIB	Head of pancreas		Ductal and Lobular Neoplasms
TCGA-IB-7644-01A	394	1	female	65	G2	T3	N1	M1	stage IV	Head of pancreas	Progressive Disease	Ductal and Lobular Neoplasms
TCGA-IB-A7LX-01A	250	1	male	57	G2	T3	N1	MX	stage IIB	Head of pancreas		Ductal and Lobular Neoplasms
TCGA-2J-AABK-01A	484	0	male	71	G2	T3	N1	M0	stage IIB	Head of pancreas	Complete Remission/Response	Ductal and Lobular Neoplasms
TCGA-S4-A8RP-01A	702	1	female	77	G3	T3	N1	MX	stage IIB	Head of pancreas		Ductal and Lobular Neoplasms
TCGA-XD-AAUG-01A	420	0	female	66	G2	T3	N1	M1	stage IV	Body of pancreas		Ductal and Lobular Neoplasms
TCGA-M8-A5N4-01A	584	0	female	48	G2	T3	N0	M0	stage IIA	Head of pancreas		Ductal and Lobular Neoplasms
TCGA-2L-AAQI-01A	103	1	male	66	G3	T3	N1	MX	stage IIB	Head of pancreas	Progressive Disease	Ductal and Lobular Neoplasms
TCGA-HZ-7919-01A	593	1	female	52	G2	T3	N1	M0	stage IIB	Head of pancreas		Ductal and Lobular Neoplasms
TCGA-IB-AAUM-01A	8	0	male	76	G3	T2	N1	M0	stage IIB	Head of pancreas	Partial Remission/Response	Ductal and Lobular Neoplasms
TCGA-2J-AAB9-01A	627	1	female	70	G1	T3	N1	M0	stage IIB	Head of pancreas		Ductal and Lobular Neoplasms
TCGA-2L-AAQJ-01A	394	1	female	49	G2	T4	N0	MX	stage III	Head of pancreas	Progressive Disease	Ductal and Lobular Neoplasms
TCGA-IB-AAUU-01A	245	0	male	35	G3	T3	N1	M0	stage IIB	Head of pancreas	Complete Remission/Response	Ductal and Lobular Neoplasms
TCGA-Q3-A5QY-01A	416	0	male	58	G2	T3	N1	MX	stage IIB	Head of pancreas		Ductal and Lobular Neoplasms
TCGA-FB-AAQ1-01A	123	1	male	49	G2	T3	N1	MX	stage IIB	Head of pancreas	Stable Disease	Ductal and Lobular Neoplasms
TCGA-HV-A5A3-01A	128	1	male	50	G2	T3	NX	MX	stage IIA	Body of pancreas		Ductal and Lobular Neoplasms
TCGA-IB-AAUO-01A	239	1	female	64	G3	T3	N1	M0	stage IIB	Head of pancreas	Partial Remission/Response	Ductal and Lobular Neoplasms
TCGA-IB-8127-01A	522	0	male	59	G2	T3	N1	M0	stage IIB	Head of pancreas	Complete Remission/Response	Ductal and Lobular Neoplasms
TCGA-FB-A545-01A	732	1	female	72	G2	T3	N1	M0	stage IIB	Body of pancreas	Complete Remission/Response	Ductal and Lobular Neoplasms
TCGA-YH-A8SY-01A	388	0	female	73	G2	T3	N1	MX	not reported	Head of pancreas		Adenomas and Adenocarcinomas
TCGA-IB-A5SQ-01A	219	1	female	56	G2	T2	N0	M0	stage IB	Head of pancreas		Ductal and Lobular Neoplasms
TCGA-HV-A7OP-01A	978	0	male	72	GX	T3	N1	M0	stage IIB	Head of pancreas		Ductal and Lobular Neoplasms
TCGA-FB-AAQ6-01A	244	1	male	85	G2	T1	N0	MX	stage IA	Tail of pancreas	Progressive Disease	Ductal and Lobular Neoplasms
TCGA-FB-AAQ2-01A	153	1	female	81	G3	T3	N1	MX	stage IIB	Head of pancreas	Progressive Disease	Ductal and Lobular Neoplasms
TCGA-US-A77J-01A	568	1	female	81	G2	T3	N1b	MX	stage IIB	Head of pancreas		Ductal and Lobular Neoplasms
TCGA-3A-A9I9-01A	634	1	male	67	G2	T3	N0	MX	stage IIA	Head of pancreas		Ductal and Lobular Neoplasms
TCGA-IB-7654-01A	476	1	male	80	G2	T2	N1	M0	stage IIB	Head of pancreas		Ductal and Lobular Neoplasms
TCGA-IB-AAUW-01A	230	1	female	63	G3	T3	N1	M0	stage IIB	Head of pancreas	Complete Remission/Response	Ductal and Lobular Neoplasms
TCGA-FB-AAPZ-01A	716	0	male	54	G3	T2	N1	MX	stage IIB	Head of pancreas	Complete Remission/Response	Ductal and Lobular Neoplasms
TCGA-IB-AAUS-01A	225	0	female	84	G2	T3	N1	M0	stage IIB	Head of pancreas		Ductal and Lobular Neoplasms
TCGA-F2-6879-01A	334	1	male	57	G2	T3	N1	M0	stage IIB	Head of pancreas	Complete Remission/Response	Adenomas and Adenocarcinomas
TCGA-3A-A9IS-01A	998	0	male	67	G1	T2	N0	MX	stage IB	Body of pancreas		Adenomas and Adenocarcinomas
TCGA-L1-A7W4-01A	278	1	female	48	G3	T3	N1	M0	stage IIB	Head of pancreas	Progressive Disease	Ductal and Lobular Neoplasms
TCGA-FB-A7DR-01A	353	1	male	48	G2	T3	NX	M0	stage IIA	Head of pancreas	Complete Remission/Response	Cystic, Mucinous and Serous Neoplasms
TCGA-2J-AABO-01A	440	0	male	43	G2	T3	N1	M0	stage IIB	Head of pancreas	Progressive Disease	Ductal and Lobular Neoplasms
TCGA-3A-A9IH-01A	1021	0	female	66	G2	T1	N0	MX	stage IA	Body of pancreas		Ductal and Lobular Neoplasms
TCGA-PZ-A5RE-01A	470	1	female	44	G3	T3	N1	MX	stage IIB	Head of pancreas		Ductal and Lobular Neoplasms
TCGA-HZ-8003-01A	596	1	female	65	G2	T3	N1	MX	stage IIB	Head of pancreas	Complete Remission/Response	Ductal and Lobular Neoplasms
TCGA-3A-A9IB-01A	224	1	female	69	G3	T3	N1	MX	stage IIB	Head of pancreas		Ductal and Lobular Neoplasms
TCGA-H6-A45N-01A	421	1	female	88	G3	T3	N1	MX	stage IIB	Tail of pancreas	Progressive Disease	Adenomas and Adenocarcinomas
TCGA-HZ-8001-01A	706	0	male	69	G2	T4	N0	MX	stage III	Head of pancreas	Complete Remission/Response	Ductal and Lobular Neoplasms
TCGA-IB-A7M4-01A	483	0	male	81	G3	T3	N1	MX	stage IIB	Body of pancreas	Complete Remission/Response	Ductal and Lobular Neoplasms
TCGA-2J-AABP-01A	463	0	female	58	G4	T3	N1	M0	stage IIB	Tail of pancreas	Complete Remission/Response	Epithelial Neoplasms, NOS
TCGA-HZ-A77Q-01A	33	0	female	55	G2	T3	N1	MX	stage IIB	Head of pancreas		Adenomas and Adenocarcinomas
TCGA-HZ-7926-01A	518	1	male	57	G1	T3	N1	MX	stage IIB	Head of pancreas	Progressive Disease	Ductal and Lobular Neoplasms
TCGA-XN-A8T5-01A	720	0	female	53	G2	T2	N0	M0	stage IB	Head of pancreas	Progressive Disease	Ductal and Lobular Neoplasms
TCGA-IB-A5ST-01A	635	0	female	64	G2	T3	N1	M0	stage IIB	Head of pancreas	Complete Remission/Response	Ductal and Lobular Neoplasms
TCGA-FB-AAQ0-01A	473	1	male	68	G3	T3	N0	MX	stage IIA	Head of pancreas	Complete Remission/Response	Ductal and Lobular Neoplasms
TCGA-2J-AABH-01A	1287	0	male	61	G3	T3	N0	M0	stage IIA	Body of pancreas	Complete Remission/Response	Adenomas and Adenocarcinomas
TCGA-IB-AAUT-01A	287	0	male	65	G1	T2	N1	M0	stage IIB	Head of pancreas	Complete Remission/Response	Cystic, Mucinous and Serous Neoplasms
TCGA-HV-A5A4-01A	232	0	female	72	G2	T3	N0	MX	stage IIA	Tail of pancreas		Ductal and Lobular Neoplasms
TCGA-US-A779-01A	511	1	female	54	G1	T3	N1b	MX	stage IIB	Head of pancreas		Ductal and Lobular Neoplasms
TCGA-FB-AAPP-01A	485	1	male	71	G3	T3	N1	MX	stage IIB	Head of pancreas	Progressive Disease	Ductal and Lobular Neoplasms
TCGA-HV-A5A6-01A	2036	1	female	65	G1	T3	N1b	M0	stage IIB	Head of pancreas	Progressive Disease	Ductal and Lobular Neoplasms
TCGA-FB-A78T-01A	375	1	female	71	G2	T3	N1	M0	stage IIB	Head of pancreas	Complete Remission/Response	Ductal and Lobular Neoplasms
TCGA-IB-7646-01A	145	1	male	60	G2	T3	N1	M0	stage IIB	Head of pancreas	Partial Remission/Response	Ductal and Lobular Neoplasms
TCGA-RL-AAAS-01A	9	0	female	60	G2	T2	N0	M0	stage IB	Head of pancreas	Complete Remission/Response	Ductal and Lobular Neoplasms
TCGA-US-A77E-01A	430	1	male	73	G3	T3	N1	MX	stage IIB	Head of pancreas		Adenomas and Adenocarcinomas
TCGA-HZ-8636-01A	545	1	female	58	G3	T3	N0	M1	stage IV	Tail of pancreas	Progressive Disease	Ductal and Lobular Neoplasms
TCGA-IB-AAUP-01A	431	0	male	68	G2	T3	N1	M0	stage IIB	Head of pancreas	Complete Remission/Response	Ductal and Lobular Neoplasms
TCGA-IB-AAUR-01A	338	0	male	67	G1	T3	N1	M0	stage IIB	Head of pancreas	Partial Remission/Response	Ductal and Lobular Neoplasms
TCGA-F2-A8YN-01A	517	0	male	76	G2	T3	N0	M0	stage IIA	Head of pancreas	Progressive Disease	Ductal and Lobular Neoplasms
TCGA-3E-AAAZ-01A	2182	1	male	71	G2	T3	N0	MX	stage IIA	Head of pancreas		Ductal and Lobular Neoplasms
TCGA-HZ-8637-01A	517	1	female	76	G3	T3	N1	MX	stage IIB	Head of pancreas	Complete Remission/Response	Ductal and Lobular Neoplasms
TCGA-HZ-A4BH-01A	194	0	male	75	G3	T3	N1b	MX	stage IIB	Head of pancreas		Ductal and Lobular Neoplasms
TCGA-3A-A9I5-01A	1794	0	male	57	G1		N0	MX	not reported	Head of pancreas	Complete Remission/Response	Ductal and Lobular Neoplasms
TCGA-XD-AAUL-01A	498	0	male	56	G2	T3	N0	MX	stage IIA	Head of pancreas	Complete Remission/Response	Ductal and Lobular Neoplasms
TCGA-HZ-7923-01A	314	0	male	65	G2	T3	N0	MX	stage IIA	Head of pancreas	Complete Remission/Response	Ductal and Lobular Neoplasms
TCGA-2J-AABE-01A	676	0	male	73	G2	T3	N0	M0	stage IIA	Body of pancreas	Complete Remission/Response	Ductal and Lobular Neoplasms
TCGA-FB-AAPU-01A	381	1	female	41	G2	T3	N0	MX	stage IIA	Head of pancreas	Progressive Disease	Ductal and Lobular Neoplasms
TCGA-3A-A9IC-01A	738	1	female	61	G2	T3	N1	MX	stage IIB	Head of pancreas		Ductal and Lobular Neoplasms
TCGA-2J-AABI-01A	969	0	female	55	G3	T3	N0	M0	stage IIA	Head of pancreas	Progressive Disease	Adenomas and Adenocarcinomas
TCGA-HZ-A77O-01A	160	1	female	77	G2	T2	N1	MX	stage IIB	Head of pancreas	Complete Remission/Response	Ductal and Lobular Neoplasms
TCGA-YY-A8LH-01A	2016	0	female	61	G3	T3	N1	MX	stage IIB	Tail of pancreas	Complete Remission/Response	Ductal and Lobular Neoplasms
TCGA-3E-AAAY-01A	2285	0	male	67	G3	T3	N1	MX	stage IIB	Body of pancreas	Complete Remission/Response	Ductal and Lobular Neoplasms
TCGA-3A-A9IZ-01A	308	1	male	47	G2	T3	N1	MX	stage IIB	Head of pancreas		Ductal and Lobular Neoplasms
TCGA-IB-A6UG-01A	41	1	male	65	G3	T3	N1	M0	stage IIB	Head of pancreas	Partial Remission/Response	Ductal and Lobular Neoplasms
TCGA-FB-A5VM-01A	498	1	male	74	G3	T2	N0	M0	stage IB	Head of pancreas	Progressive Disease	Ductal and Lobular Neoplasms
TCGA-RB-AA9M-01A	286	0	male	43	G3	T1	N1	MX	stage IIB	Tail of pancreas	Progressive Disease	Ductal and Lobular Neoplasms
TCGA-HZ-A49G-01A	660	0	female	58	G2	T2	N1	MX	stage IIB	Head of pancreas	Progressive Disease	Ductal and Lobular Neoplasms
TCGA-HV-AA8X-01A	532	1	female	75	G2	T2	N1	MX	stage IIB	Body of pancreas	Stable Disease	Ductal and Lobular Neoplasms
TCGA-LB-A7SX-01A	393	1	female	74	G2	T3	N1	MX	stage IIB	Head of pancreas	Stable Disease	Ductal and Lobular Neoplasms
TCGA-HZ-7922-01A	4	0	female	61	G1	T3	N1	MX	stage IIB	Head of pancreas		Ductal and Lobular Neoplasms
TCGA-2J-AABV-01A	652	1	male	74	G4	T3	N1	M0	stage IIB	Head of pancreas	Progressive Disease	Ductal and Lobular Neoplasms
TCGA-IB-AAUN-01A	144	1	female	74	G2	T2	N0	M0	stage IB	Head of pancreas	Complete Remission/Response	Ductal and Lobular Neoplasms
TCGA-IB-A6UF-01A	666	0	male	63	G2	T3	N1	M0	stage IIB	Head of pancreas	Partial Remission/Response	Ductal and Lobular Neoplasms
TCGA-HV-A7OL-01A	252	0	male	70	G2	T3	N0	MX	stage IIA	Head of pancreas	Stable Disease	Ductal and Lobular Neoplasms
TCGA-IB-7651-01A	603	1	female	64	G2	T3	N1	M0	stage IIB	Head of pancreas	Complete Remission/Response	Ductal and Lobular Neoplasms
TCGA-2J-AABU-01A	277	1	male	56	G3	T3	N1	M0	stage IIB	Head of pancreas		Ductal and Lobular Neoplasms
TCGA-XN-A8T3-01A	951	0	male	67	G2	T2	N0	M0	stage IB	Head of pancreas	Progressive Disease	Ductal and Lobular Neoplasms
TCGA-HV-AA8V-01A	920	0	male	50	G3	T3	N1	MX	stage IIB	Head of pancreas		Ductal and Lobular Neoplasms
TCGA-S4-A8RO-01A	525	0	female	75	G2	T3	N1	MX	stage IIB	Head of pancreas	Complete Remission/Response	Ductal and Lobular Neoplasms
TCGA-IB-8126-01A	462	0	female	79	G1	T4	N1	M0	stage III	Head of pancreas		Ductal and Lobular Neoplasms
TCGA-2J-AABF-01A	691	1	male	73	G3	T3	N1	M0	stage IIB	Head of pancreas	Progressive Disease	Ductal and Lobular Neoplasms
TCGA-US-A776-01A	1216	0	male	61	G2	T3	N0	MX	stage IIA	Head of pancreas	Complete Remission/Response	Cystic, Mucinous and Serous Neoplasms
TCGA-2J-AABT-01A	319	0	female	72	G2	T3	N1	M0	stage IIB	Head of pancreas		Ductal and Lobular Neoplasms
TCGA-XD-AAUI-01A	366	1	female	50	G2	T3	N1	MX	stage IIB	Head of pancreas	Progressive Disease	Ductal and Lobular Neoplasms
TCGA-RB-A7B8-01A	466	1	female	81	G2	T3	N1	MX	stage IIB	Head of pancreas	Complete Remission/Response	Adenomas and Adenocarcinomas
TCGA-XD-AAUH-01A	395	0	female	57	G2	T3	N1	M0	stage IIB	Head of pancreas		Ductal and Lobular Neoplasms
TCGA-2J-AAB6-01A	293	1	male	75	G2	T3	N0	M0	stage IIA	Body of pancreas		Ductal and Lobular Neoplasms
TCGA-2J-AAB4-01A	729	0	male	48	G2	T2	N1	M0	stage IIB	Overlapping lesion of pancreas	Complete Remission/Response	Adenomas and Adenocarcinomas
TCGA-FB-A4P6-01A	767	0	male	54	G1	T3	N1	MX	stage IIB	Head of pancreas		Ductal and Lobular Neoplasms
TCGA-IB-AAUV-01A	404	0	male	49	G2	T3	N1	M0	stage IIB	Head of pancreas	Complete Remission/Response	Ductal and Lobular Neoplasms
TCGA-3A-A9IL-01A	2741	0	female	39	G1	T1		MX	stage I	Body of pancreas		Adenomas and Adenocarcinomas
TCGA-IB-AAUQ-01A	183	1	male	50	G2	T3	N1	M0	stage IIB	Tail of pancreas	Partial Remission/Response	Ductal and Lobular Neoplasms
TCGA-FB-AAPQ-01A	1130	1	male	65	G2	T3	N1	MX	stage IIB	Head of pancreas	Progressive Disease	Ductal and Lobular Neoplasms
TCGA-IB-A5SS-01A	460	1	female	64	G3	T3	N1	M0	stage IIB	Tail of pancreas	Complete Remission/Response	Ductal and Lobular Neoplasms
TCGA-IB-7645-01A	1502	1	female	44	G1	T3	N1	M0	stage IIB	Head of pancreas	Progressive Disease	Ductal and Lobular Neoplasms
TCGA-2J-AAB1-01A	66	1	male	65	G3	T3	N1	M0	stage IIB	Head of pancreas		Cystic, Mucinous and Serous Neoplasms
TCGA-IB-A5SP-01A	482	0	male	77	G2	T3	N0	M0	stage IIA	Head of pancreas		Ductal and Lobular Neoplasms
TCGA-OE-A75W-01A	267	1	male	75	G1	T3	N0	M0	stage IIA	Tail of pancreas	Progressive Disease	Ductal and Lobular Neoplasms
TCGA-3A-A9IX-01A	1037	0	male	40	G2	T1	N0	MX	stage IA	Head of pancreas	Complete Remission/Response	Ductal and Lobular Neoplasms
TCGA-3A-A9IV-01A	1103	0	female	59	G1	T2	N0	MX	stage IB	Tail of pancreas	Complete Remission/Response	Adenomas and Adenocarcinomas
TCGA-HZ-8315-01A	299	1	female	54	G2	T3	N0	MX	stage IIA	Head of pancreas		Ductal and Lobular Neoplasms
TCGA-Q3-AA2A-01A	95	0	female	64	G1	T3	N1	MX	stage IB	Head of pancreas		Ductal and Lobular Neoplasms
TCGA-HZ-7925-01A	614	1	male	66	G2	T3	N1	MX	stage IIB	Head of pancreas	Complete Remission/Response	Ductal and Lobular Neoplasms
TCGA-HZ-7289-01A	661	1	male	77	G1	T3	N1	MX	stage IIB	Head of pancreas		Adenomas and Adenocarcinomas
TCGA-HZ-8519-01A	454	0	male	73	G3	T1	N0	MX	stage IA	Head of pancreas	Complete Remission/Response	Adenomas and Adenocarcinomas
TCGA-F2-A44G-01A	233	1	female	79	G2	T3	N1	M0	stage IIB	Head of pancreas	Complete Remission/Response	Adenomas and Adenocarcinomas
TCGA-HZ-8638-01A	151	1	female	84	GX	T1	N0	MX	stage IA	Head of pancreas	Complete Remission/Response	Cystic, Mucinous and Serous Neoplasms
TCGA-3A-A9IU-01A	458	1	male	65	G3	T3	N1	MX	stage IIB	Head of pancreas		Ductal and Lobular Neoplasms
TCGA-2J-AABR-01A	438	0	female	60	G3	T3	N0	M0	stage IIA	Overlapping lesion of pancreas	Progressive Disease	Ductal and Lobular Neoplasms
TCGA-2J-AABA-01A	607	1	male	55	G2	T3	N1	M0	stage IIB	Head of pancreas	Progressive Disease	Ductal and Lobular Neoplasms
TCGA-F2-6880-01A	295	0	male	70	G1	T3	N1	M0	stage IIB	Head of pancreas		Adenomas and Adenocarcinomas
TCGA-F2-A7TX-01A	95	1	male	77	G3	T3	N1	M0	stage IIB	Head of pancreas		Ductal and Lobular Neoplasms
TCGA-HZ-A4BK-01A	657	0	male	72	G3	T3	N1	MX	stage IIB	Head of pancreas	Progressive Disease	Adenomas and Adenocarcinomas
TCGA-HZ-A77P-01A	330	0	male	77	G1	T3	N1	MX	stage IIB	Head of pancreas	Complete Remission/Response	Adenomas and Adenocarcinomas
TCGA-3A-A9J0-01A	743	0	male	75	G2	T3	N1	MX	stage IIB	Head of pancreas		Ductal and Lobular Neoplasms
TCGA-HZ-A8P1-01A	7	0	male	81	G1	T2	N0	MX	stage IB	Tail of pancreas		Ductal and Lobular Neoplasms
TCGA-2L-AAQL-01A	292	1	male	82	G3	T3	N1	MX	stage IIB	Head of pancreas	Progressive Disease	Ductal and Lobular Neoplasms
TCGA-HZ-8317-01A	378	1	female	69	G1	T3	N1	MX	stage IIB	Head of pancreas	Progressive Disease	Ductal and Lobular Neoplasms
TCGA-HZ-7920-01A	236	1	male	71	G2	T2	N0	MX	stage IB	Head of pancreas	Complete Remission/Response	Ductal and Lobular Neoplasms
TCGA-HZ-A49I-01A	308	1	male	77	G2	T3	N1	MX	stage IIB	Head of pancreas	Progressive Disease	Ductal and Lobular Neoplasms
TCGA-HZ-A9TJ-01A	603	0	male	70	G2	T3	N0	M1	stage IV	Tail of pancreas		Adenomas and Adenocarcinomas
TCGA-YB-A89D-01A	350	0	male	59	G2	T3	N1	MX	stage IIB	Body of pancreas	Complete Remission/Response	Ductal and Lobular Neoplasms
TCGA-IB-7649-01A	467	1	female	73	G2	T3	N1	M0	stage IIB	Head of pancreas	Partial Remission/Response	Ductal and Lobular Neoplasms
TCGA-LB-A8F3-01A	379	0	female	64	G1	T3	N0	MX	stage IIA	Head of pancreas		Ductal and Lobular Neoplasms
TCGA-2J-AAB8-01A	80	0	male	71	G3	T3	N1	M0	stage IIB	Head of pancreas		Ductal and Lobular Neoplasms
TCGA-3A-A9IR-01A	1542	0	female	64	G1	T2	N0	MX	stage IB	Tail of pancreas	Complete Remission/Response	Adenomas and Adenocarcinomas
TCGA-2L-AAQE-01A	684	1	male	56	G2	T3	N1	M0	stage IIB	Head of pancreas	Progressive Disease	Ductal and Lobular Neoplasms
TCGA-3A-A9I7-01A	1323	0	male	45	G2	T3	N1	MX	stage IIB	Head of pancreas		Ductal and Lobular Neoplasms
TCGA-LB-A9Q5-01A	313	1	female	63	G3	T3	N1	MX	stage IIB	Head of pancreas		Ductal and Lobular Neoplasms
TCGA-HZ-7924-01A	840	0	female	60	G2	T3	N0	MX	stage IIA	Head of pancreas	Complete Remission/Response	Ductal and Lobular Neoplasms
TCGA-HZ-8002-01A	366	1	male	61	G2	T3	N1	MX	stage IIB	Head of pancreas		Ductal and Lobular Neoplasms
TCGA-FB-AAPY-01A	1059	1	male	71	G2	T2	N1	MX	stage IIB	Head of pancreas	Complete Remission/Response	Ductal and Lobular Neoplasms
TCGA-F2-A44H-01A	586	0	male	65	G2	T3	N0	M0	stage IIA	Head of pancreas	Complete Remission/Response	Adenomas and Adenocarcinomas
TCGA-IB-A5SO-01A	365	1	male	71	G2	T3	N1	M0	stage IIB	Head of pancreas	Progressive Disease	Ductal and Lobular Neoplasms
TCGA-FB-AAQ3-01A	31	1	female	65	G2	T3	N1	MX	stage IIB	Head of pancreas		Ductal and Lobular Neoplasms
TCGA-HZ-7918-01A	969	0	male	72	G3	T3	N1	M0	stage IIB	Head of pancreas	Complete Remission/Response	Ductal and Lobular Neoplasms
TCGA-H8-A6C1-01A	671	0	male	53	G2	T3	N0	MX	stage IIA	Head of pancreas	Complete Remission/Response	Adenomas and Adenocarcinomas

## Sheet: Table S3
	from	to	pvalue	cor	weight	color
2	VCAN	ZNF469	0	0.722073	13.5881	#FB9A99
17	COMP	ZNF469	2.06e-07	0.400018	6.68682	#FB9A99
33	MMP11	VCAN	2.56e-11	0.495435	10.5926	#FB9A99
133	MMP11	SFRP2	1.09e-06	0.376928	5.96287	#FB9A99
167	COMP	POSTN	1.99e-05	0.332125	4.70114	#FB9A99
184	LUM	MMP11	8.22e-10	0.465718	9.08518	#FB9A99
187	GREM1	MMP11	1.4e-08	0.434015	7.85437	#FB9A99
188	FNDC1	MMP11	1.02e-09	0.463442	8.99012	#FB9A99
192	COMP	MMP11	8.53e-08	0.411567	7.06913	#FB9A99
292	COMP	GREM1	2.18e-05	0.330637	4.6623	#FB9A99
367	COMP	FAP	5.61e-11	0.490094	10.2514	#FB9A99
420	COL3A1	COMP	2.78e-11	0.494914	10.5559	#FB9A99

## Sheet: Table S4
id	Cluster	Project	TP53	KRAS	Fustat	Gender	Age	Stage	KEGG_OLFACTORY_TRANSDUCTION	KEGG_GLYCINE_SERINE_AND_THREONINE_METABOLISM	KEGG_BETA_ALANINE_METABOLISM	KEGG_FATTY_ACID_METABOLISM	KEGG_PRIMARY_BILE_ACID_BIOSYNTHESIS	KEGG_VALINE_LEUCINE_AND_ISOLEUCINE_DEGRADATION	KEGG_TRYPTOPHAN_METABOLISM	KEGG_PROPANOATE_METABOLISM	KEGG_PYRUVATE_METABOLISM	KEGG_PPAR_SIGNALING_PATHWAY	KEGG_PROXIMAL_TUBULE_BICARBONATE_RECLAMATION	KEGG_TYROSINE_METABOLISM	KEGG_TAURINE_AND_HYPOTAURINE_METABOLISM	KEGG_SELENOAMINO_ACID_METABOLISM	KEGG_REGULATION_OF_AUTOPHAGY	KEGG_NEUROACTIVE_LIGAND_RECEPTOR_INTERACTION	KEGG_BUTANOATE_METABOLISM	KEGG_PHENYLALANINE_METABOLISM	KEGG_PROTEIN_EXPORT	KEGG_LYSINE_DEGRADATION	KEGG_ALANINE_ASPARTATE_AND_GLUTAMATE_METABOLISM	KEGG_RENIN_ANGIOTENSIN_SYSTEM	KEGG_PANTOTHENATE_AND_COA_BIOSYNTHESIS	KEGG_SNARE_INTERACTIONS_IN_VESICULAR_TRANSPORT	KEGG_T_CELL_RECEPTOR_SIGNALING_PATHWAY	KEGG_B_CELL_RECEPTOR_SIGNALING_PATHWAY	KEGG_FC_EPSILON_RI_SIGNALING_PATHWAY
TCGA-2J-AAB1-01A	CAFclusterA	TCGA	Normal	Abnormal	Dead	Male	>=65	II	0.0355807	-0.0604479	0.209424	0.363117	0.299723	0.14919	0.172026	0.21725	-0.120676	0.0569781	0.244567	0.33969	0.115069	0.0729764	-0.239735	0.171779	0.186408	0.268514	-0.715262	-0.154049	-0.106162	0.0199444	0.0314625	0.0639314	0.121743	0.0210444	-0.121026
TCGA-2J-AAB4-01A	CAFclusterA	TCGA	Abnormal	Abnormal	Live	Male	<65	II	0.118508	0.123456	-0.174717	0.157411	0.00185686	0.0899707	0.339351	0.087982	0.17947	0.0692206	0.313167	0.196776	0.47076	0.177507	-0.10546	-0.0494215	0.304832	0.343625	-0.178735	-0.153225	0.0507384	-0.112688	-0.0636306	0.115767	0.165686	0.0760491	0.0222213
TCGA-2J-AAB6-01A	CAFclusterA	TCGA	Abnormal	Abnormal	Dead	Male	>=65	II	0.152057	0.122413	-0.319707	-0.579505	-0.39652	-0.406824	-0.155866	-0.445493	-0.0194067	-0.415927	-0.429365	-0.195872	-0.429861	-0.206608	0.0223414	0.0815102	-0.399927	-0.29636	0.282823	-0.00673781	-0.0888369	0.166294	0.0783579	0.228755	-0.146496	-0.126714	-0.0636359
TCGA-2J-AAB8-01A	CAFclusterA	TCGA	Abnormal	Normal	Live	Male	>=65	II	0.0658005	-0.339332	0.0837886	-0.253891	-0.0459978	-0.0149436	-0.218548	0.00876151	-0.169159	-0.126893	-0.192377	-0.119789	-0.361024	-0.0491742	-0.11892	-0.238085	-0.112983	-0.155586	0.254265	-0.217819	-0.0631746	-0.138264	-0.240659	0.0275337	-0.230568	-0.256376	-0.0473574
TCGA-2J-AAB9-01A	CAFclusterA	TCGA	Normal	Normal	Dead	Female	>=65	II	0.209555	0.575768	0.280258	0.0769251	0.272265	0.288963	0.343382	0.345995	0.280619	0.216213	0.345012	0.154235	0.556297	0.376381	0.117476	0.423821	0.0974666	0.210457	0.160455	0.0898239	0.287854	0.259122	0.0719426	-0.0618522	0.262553	0.129611	0.01967
TCGA-2J-AABA-01A	CAFclusterA	TCGA	Normal	Normal	Dead	Male	<65	II	0.0850658	0.228532	-0.00602413	0.199218	0.241735	-0.222013	-0.15273	-0.262997	-0.352264	0.09088	-0.484715	0.194101	0.338269	0.0130065	-0.15201	-0.103697	-0.274472	-0.135919	-0.379087	-0.242118	-0.169714	0.0745853	-0.330066	-0.439086	0.0143744	-0.147285	-0.120288
TCGA-2J-AABE-01A	CAFclusterA	TCGA	Normal	Abnormal	Live	Male	>=65	II	-0.00671864	-0.456774	-0.144635	-0.171919	0.138081	-0.0978873	-0.242835	-0.0653613	-0.257886	-0.16795	-0.0127767	-0.162804	0.359358	-0.235263	0.0164284	-0.0331452	0.127574	0.0538854	-0.669601	-0.00221716	-0.00327736	0.0455443	-0.38825	-0.239737	-0.167239	0.0189099	0.135937
TCGA-2J-AABF-01A	CAFclusterA	TCGA	Abnormal	Normal	Dead	Male	>=65	II	0.186843	0.0501136	-0.0462105	0.0758446	-0.0186863	-0.142529	0.249748	-0.0527508	-0.137073	0.0784755	0.15279	-0.0623068	0.120274	0.398638	0.030918	-0.0609992	0.0651922	0.174933	-0.660397	0.293279	0.017004	0.0873102	0.269182	-0.0902301	0.272917	0.273903	0.0864281
TCGA-2J-AABH-01A	CAFclusterA	TCGA	Abnormal	Abnormal	Live	Male	<65	II	0.0532283	-0.102356	-0.137478	0.130799	-0.00540385	-0.0242796	-0.0200114	0.309552	0.0836016	0.165613	0.197476	-0.215507	-0.258643	0.109519	0.0443232	-0.0703516	0.238245	0.0175767	-0.540353	0.19769	-0.10052	-0.204837	-0.502388	0.163353	-0.217619	-0.183404	-0.158042
TCGA-2J-AABI-01A	CAFclusterA	TCGA	Abnormal	Abnormal	Live	Female	<65	II	0.0456678	-0.436471	-0.577952	-0.524635	-0.712843	-0.502164	-0.397959	-0.564957	-0.446533	-0.510698	-0.681047	-0.191304	-0.496994	-0.241595	-0.301388	-0.418045	-0.522249	-0.141495	-0.648713	-0.154508	-0.418198	-0.552465	-0.4364	-0.157793	-0.122495	-0.0982544	-0.180654
TCGA-2J-AABK-01A	CAFclusterB	TCGA	Normal	Normal	Live	Male	>=65	II	0.155621	-0.075884	0.238614	0.260799	-0.0455911	0.233403	0.051059	0.112881	0.263773	0.0364981	0.497624	0.0664303	0.378018	0.213003	0.0704688	-0.136759	0.383757	0.288272	-0.099669	0.0313104	0.231246	-0.313093	-0.168779	-0.00589385	-0.359449	-0.277391	-0.29512
TCGA-2J-AABO-01A	CAFclusterA	TCGA	Abnormal	Abnormal	Live	Male	<65	II	0.160816	-0.230933	0.235756	-0.33312	-0.463485	-0.38626	0.175187	-0.137505	-0.411384	-0.247667	0.0865622	0.204389	0.162249	-0.258227	-0.203058	0.251371	-0.0539342	-0.107344	0.0885084	-0.309415	0.0488335	-0.165954	-0.19734	0.116678	-0.0985195	-0.188017	-0.11746
TCGA-2J-AABP-01A	CAFclusterA	TCGA	Abnormal	Normal	Live	Female	<65	II	0.114277	-0.0195205	-0.270677	-0.443639	-0.398284	-0.261955	-0.223303	-0.407202	0.0368108	-0.317053	-0.536677	-0.31064	-0.552665	-0.333965	0.0882049	-0.00346636	-0.399208	-0.535269	0.250268	-0.122566	-0.339459	0.136105	0.0948315	-0.0597155	0.0254982	0.0390447	-0.0208542
TCGA-2J-AABT-01A	CAFclusterA	TCGA	Abnormal	Abnormal	Live	Female	>=65	II	0.222361	-0.0186038	0.0528843	0.266779	0.161663	0.335001	0.217315	0.438127	0.418227	0.147208	0.152841	0.145096	-0.664179	-0.395826	-0.0534309	0.246281	0.0850664	0.252656	-0.614719	0.266575	-0.140419	-0.187922	-0.424792	0.089328	0.236244	0.0610711	0.237437
TCGA-2J-AABV-01A	CAFclusterB	TCGA	Normal	Normal	Dead	Male	>=65	II	0.0992091	0.52343	0.373422	0.46878	-0.0962261	0.556131	0.289486	0.250742	0.235893	0.185637	0.211313	0.474524	0.480873	0.222035	0.077018	0.0880425	0.43524	0.448922	0.419097	0.0452439	0.408772	0.179414	0.354098	0.00921262	-0.409849	-0.444188	-0.268112
TCGA-2L-AAQE-01A	CAFclusterA	TCGA	Abnormal	Abnormal	Dead	Male	<65	II	-0.00240026	-0.0862146	-0.0578258	-0.228331	-0.24199	-0.109468	-0.389983	-0.425253	-0.271425	0.126808	-0.301479	-0.059305	-0.358799	0.151948	-0.149795	-0.232721	-0.251566	-0.14628	-0.31805	-0.220276	0.016624	-0.163757	-0.0143246	0.17478	0.165756	0.106479	0.05235
TCGA-2L-AAQI-01A	CAFclusterA	TCGA	Abnormal	Abnormal	Dead	Male	>=65	II	0.172448	0.250255	0.339723	0.498747	0.292404	0.397064	0.144549	0.588055	0.29323	0.224191	0.642122	0.0164913	0.395766	0.280596	-0.0977899	0.037679	0.476931	0.095027	0.374432	0.0888806	0.285677	-0.073415	-0.0120787	0.0248105	-0.196695	-0.117924	-0.238511
TCGA-2L-AAQJ-01A	CAFclusterA	TCGA	Abnormal	Abnormal	Dead	Female	<65	III	0.0225508	-0.354638	-0.329578	-0.301404	-0.223384	-0.487393	-0.178132	-0.239301	-0.0791201	-0.136097	-0.23981	-0.195151	0.00362164	-0.238201	-0.0911506	-0.0344642	-0.299413	0.00969277	-0.0615517	-0.219019	-0.193698	-0.293365	-0.329169	-0.0216944	0.294006	0.236831	0.0856456
TCGA-2L-AAQL-01A	CAFclusterB	TCGA	Abnormal	Abnormal	Dead	Male	>=65	II	0.00528276	0.0143057	0.030203	0.0322228	0.184016	-0.180951	0.143052	-0.136296	0.00647995	0.0401492	0.150251	0.154958	0.317209	-0.340732	0.0119269	0.326674	0.105965	0.0731434	-0.219369	-0.388686	-0.204657	-0.0448877	-0.0153251	0.137693	-0.355078	-0.217357	-0.272863
TCGA-3A-A9I5-01A	CAFclusterB	TCGA	Normal	Normal	Live	Male	<65	NA	0.0202552	0.159033	0.200928	0.146603	0.124861	0.147257	0.213426	0.0380937	0.119075	-0.0719518	-0.189428	0.191884	0.59402	-0.0647352	0.0244329	-0.0322209	0.0319821	0.228165	0.423358	-0.136522	0.159659	0.41589	0.125234	0.0251785	-0.468823	-0.361088	-0.363588
TCGA-3A-A9I7-01A	CAFclusterA	TCGA	Normal	Normal	Live	Male	<65	II	0.192678	0.209531	0.0800835	0.393368	0.0252121	0.112663	0.151763	0.171536	0.24327	0.240623	0.112871	-0.0280399	-0.548854	-0.188825	-0.211416	0.0487118	0.0949309	-0.236732	-0.478166	0.0782664	0.0223981	0.420067	0.137194	-0.0682113	0.2553	0.15196	0.24287
TCGA-3A-A9I9-01A	CAFclusterA	TCGA	Abnormal	Abnormal	Dead	Male	>=65	II	0.149082	0.244826	0.191406	-0.00126024	0.0373857	0.223048	0.0427581	0.126873	0.0161843	0.0763905	0.157635	0.149126	0.259808	0.199836	0.0315911	0.0143777	0.276778	0.272491	-0.135086	-0.168173	-0.108522	-0.180764	0.158803	0.0625948	-0.360061	-0.295829	-0.212517
TCGA-3A-A9IB-01A	CAFclusterA	TCGA	Abnormal	Abnormal	Dead	Female	>=65	II	-0.013312	0.0150164	-0.123171	-0.296661	0.189818	-0.442727	-0.168745	-0.492348	-0.348004	-0.0254788	-0.245366	0.286568	-0.384785	-0.238621	0.157418	-0.0541601	-0.350626	0.418158	0.00475603	-0.294689	-0.0135009	0.435786	-0.19826	-0.104605	-0.0191986	-0.0917605	-0.0869465
TCGA-3A-A9IC-01A	CAFclusterA	TCGA	Abnormal	Abnormal	Dead	Female	<65	II	0.14845	-0.290178	-0.414345	-0.383998	0.00520611	-0.40217	-0.461998	-0.448146	-0.23998	-0.352466	-0.487181	-0.149317	-0.330285	-0.458272	-0.0935543	-0.00264891	-0.360818	-0.528479	-0.205343	-0.130133	-0.22651	-0.117036	0.0876764	0.0342593	-0.150067	-0.210943	-0.2233
TCGA-3A-A9IH-01A	CAFclusterA	TCGA	Abnormal	Abnormal	Live	Female	>=65	I	0.142935	-0.229382	0.0498116	-0.0641	-0.467405	0.23391	-0.0469682	0.125744	0.214124	-0.192254	0.116488	-0.0211684	0.0883169	-0.125519	0.0330842	-0.020767	0.234147	0.276146	0.108087	0.0105079	-0.00689874	-0.284225	-0.151888	-0.0068628	-0.231434	-0.0434755	-0.103693
TCGA-3A-A9IJ-01A	CAFclusterB	TCGA	Normal	Normal	Live	Male	>=65	I	0.139762	-0.0402385	0.108056	-0.0403562	0.102838	0.072409	-0.276479	-0.0440164	0.20614	-0.0777372	0.0699304	0.00506889	0.0146738	-0.160604	0.136966	-0.00333883	0.0231267	-0.171267	0.136421	-0.237147	-0.0787198	-0.298227	-0.233238	-0.100966	-0.452685	-0.505777	-0.318659
TCGA-3A-A9IL-01A	CAFclusterB	TCGA	Normal	Normal	Live	Female	<65	I	0.128873	-0.0195774	-0.364964	-0.308662	-0.204537	-0.208205	-0.183175	-0.263111	-0.220723	-0.343617	0.0621496	0.132543	-0.197125	-0.204859	0.0590243	-0.0454569	-0.294931	-0.153996	0.0205287	-0.0598126	-0.426959	-0.212112	-0.177028	-0.186552	-0.52527	-0.62247	-0.392624
TCGA-3A-A9IN-01A	CAFclusterB	TCGA	Normal	Normal	Live	Female	<65	I	0.205539	-0.0215616	-0.212893	-0.283002	-0.17367	-0.428992	-0.276824	-0.424789	-0.220517	-0.0142955	-0.275758	-0.167214	0.0626027	-0.40626	0.100384	0.217111	-0.0741952	-0.380667	-0.0135421	-0.200689	-0.23038	-0.0658515	-0.204284	0.0468748	-0.422261	-0.518204	-0.225071
TCGA-3A-A9IO-01A	CAFclusterB	TCGA	Normal	Normal	Live	Male	<65	NA	0.11319	0.0348109	0.0519347	-0.0413469	-0.0219499	0.217726	0.0720306	0.197398	0.322148	-0.253232	0.304921	-0.0491325	-0.222968	-0.0490084	0.187548	-0.116336	-0.00227703	-0.32145	0.546632	-0.0125889	-0.00630256	-0.0164208	0.107674	-0.0239228	-0.455765	-0.500619	-0.182168
TCGA-3A-A9IR-01A	CAFclusterB	TCGA	Normal	Normal	Live	Female	<65	I	0.151581	-0.169305	-0.0292825	0.0209696	-0.0459359	0.122313	-0.250505	-0.0375302	-0.0597777	-0.258555	-0.266556	-0.0417593	-0.591275	-0.169123	0.13116	-0.164642	-0.109833	-0.300442	0.413633	-0.144628	-0.264916	-0.440884	0.251282	-0.176836	-0.368836	-0.499405	-0.219156
TCGA-3A-A9IS-01A	CAFclusterB	TCGA	Normal	Normal	Live	Male	>=65	I	-0.0638186	-0.016546	-0.322313	-0.298237	0.13834	-0.192973	-0.348959	-0.244532	-0.140952	-0.166634	-0.0230467	-0.134728	-0.445933	0.0520032	0.0362831	-0.186491	-0.211759	-0.274903	0.226136	0.0318069	-0.0507777	-0.274007	-0.216006	-0.198065	-0.434182	-0.512159	-0.247571
TCGA-3A-A9IU-01A	CAFclusterA	TCGA	Abnormal	Abnormal	Dead	Male	>=65	II	0.0290156	-0.520811	-0.434247	-0.495449	-0.599714	-0.222517	-0.485508	-0.459723	-0.470219	-0.493143	-0.536209	-0.233198	-0.55597	-0.27674	0.0127032	-0.406398	-0.444817	-0.214783	-0.257165	-0.123982	-0.351481	-0.175651	-0.157024	-0.203605	-0.232191	-0.118899	-0.29273
TCGA-3A-A9IV-01A	CAFclusterB	TCGA	Normal	Normal	Live	Female	<65	I	0.241211	0.0777073	0.0295534	-0.0258251	0.0291302	0.249789	-0.123645	0.122952	0.203896	-0.101481	-0.207665	-0.276216	-0.207105	-0.238166	0.296626	0.0229181	0.033375	-0.332623	0.561717	0.115903	0.169525	-0.137308	-0.0279008	0.0701306	-0.512755	-0.526943	-0.299399
TCGA-3A-A9IX-01A	CAFclusterA	TCGA	Normal	Normal	Live	Male	<65	I	0.185765	0.409176	0.277186	0.144635	0.315791	-0.0233772	0.123688	0.148497	-0.381811	0.0447706	0.357874	-0.110899	0.568547	0.249084	-0.122768	0.332468	-0.193218	0.0231734	-0.108175	0.00829112	-0.184743	0.14833	-0.161027	-0.205561	0.340192	0.39287	0.160785
TCGA-3A-A9IZ-01A	CAFclusterA	TCGA	Abnormal	Abnormal	Dead	Male	<65	II	0.120613	-0.121339	-0.286359	-0.0190503	-0.509704	-0.169544	-0.256908	-0.17858	-0.00735624	-0.0155281	-0.273989	-0.135777	-0.389239	-0.186209	-0.237928	-0.277805	-0.00188152	-0.218149	0.176532	-0.188714	-0.207807	-0.122064	-0.174025	-0.266327	-0.200296	-0.274262	-0.172733
TCGA-3A-A9J0-01A	CAFclusterA	TCGA	Abnormal	Normal	Live	Male	>=65	II	-0.0437814	-0.0528406	-0.0314081	-0.0299538	-0.430755	0.227056	0.0192785	0.328379	0.090386	0.117797	-0.50866	0.357307	0.0797763	0.147121	0.0386136	-0.258441	0.166138	-0.0109554	-0.321163	-0.0478842	-0.0699679	-0.240645	-0.0563555	-0.277219	-0.133091	0.00659422	0.0597951
TCGA-3E-AAAY-01A	CAFclusterA	TCGA	Abnormal	Normal	Live	Male	>=65	II	0.163578	0.0954884	0.27287	0.208061	0.369784	0.0670234	0.301342	-0.0916183	-0.00123238	0.0964674	0.361432	-0.061977	0.6216	0.218206	0.238441	0.0557078	-0.0728621	0.169268	-0.274513	-0.365734	0.0547577	0.079913	0.336361	0.0984115	0.0152888	0.0355312	-0.169112
TCGA-3E-AAAZ-01A	CAFclusterA	TCGA	Normal	Abnormal	Dead	Male	>=65	II	0.112477	-0.0734877	-0.142848	-0.0677731	-0.521679	-0.00945166	-0.148473	0.19834	0.0380487	-0.277492	0.0425772	0.167975	-0.547767	-0.162666	0.187261	-0.0940513	-0.09542	0.273076	-0.309063	0.181702	-0.0950754	-0.165893	-0.553455	-0.186355	-0.344893	-0.356824	-0.163
TCGA-F2-6879-01A	CAFclusterA	TCGA	Abnormal	Abnormal	Dead	Male	<65	II	0.119669	-0.452537	-0.115609	-0.194141	-0.253062	0.269554	-0.263059	0.273754	0.0439954	-0.111747	-0.124003	-0.40929	-0.237506	0.069075	-0.14987	-0.30933	0.0338956	-0.104242	0.0393216	0.100745	-0.0574477	-0.0328085	-0.452042	-0.135473	-0.127006	-0.104855	-0.0163215
TCGA-F2-A44G-01A	CAFclusterA	TCGA	Normal	Abnormal	Dead	Female	>=65	II	0.151455	-0.210622	-0.171146	-0.271205	-0.48933	-0.231715	-0.0901331	-0.196373	-0.126839	-0.0989093	-0.126145	-0.290941	-0.381802	0.0897775	-0.196988	-0.370645	-0.133698	0.0493853	-0.248145	-0.0873573	0.12308	-0.22393	-0.0408094	-0.201447	-0.075914	0.0248009	-0.0230619
TCGA-F2-A44H-01A	CAFclusterA	TCGA	Normal	Normal	Live	Male	>=65	II	0.203444	0.472929	0.469299	0.23731	0.451127	0.415494	0.396412	0.280392	0.188916	0.0468824	0.471676	0.0842607	0.272684	0.338993	0.198346	0.358276	0.344497	0.334065	-0.00266799	0.300322	0.422758	0.332905	0.488143	-0.021437	0.0719012	0.115482	0.318647
TCGA-F2-A7TX-01A	CAFclusterA	TCGA	Abnormal	Abnormal	Dead	Male	>=65	II	0.125216	0.354283	0.357629	0.356787	-0.0897662	0.335999	0.300981	0.208499	0.293425	0.210264	0.000524465	0.180228	-0.474875	0.145493	0.0749839	0.214813	0.234861	-0.0400325	0.394094	0.405909	0.371276	0.00628362	0.529664	-0.261046	0.372932	0.359764	0.256812
TCGA-F2-A8YN-01A	CAFclusterA	TCGA	Normal	Normal	Live	Male	>=65	II	0.10143	0.0933733	0.278186	0.322473	0.496235	0.524901	-0.0413607	0.340152	0.350861	0.19419	0.0626797	0.18603	-0.0536785	0.449597	-0.0564622	-0.164344	0.373492	0.115576	-0.0573935	0.0754133	0.216177	-0.447433	0.31371	-0.0685342	-0.196715	-0.20199	0.0467988
TCGA-FB-A545-01A	CAFclusterA	TCGA	Abnormal	Abnormal	Dead	Female	>=65	II	0.0632509	-0.251263	-0.420198	-0.545489	-0.556463	-0.564478	-0.510783	-0.469966	-0.391715	-0.372534	-0.389851	-0.258075	-0.400082	-0.309294	0.0490761	-0.285704	-0.5244	-0.241577	-0.541084	-0.137054	-0.387517	-0.292159	-0.23015	-0.29414	-0.241223	-0.211672	-0.15342
TCGA-FB-A5VM-01A	CAFclusterA	TCGA	Abnormal	Abnormal	Dead	Male	>=65	I	0.115245	-0.038864	-0.200287	-0.337844	-0.465772	-0.38508	0.0594087	-0.457313	-0.255918	-0.168355	-0.499973	0.178061	-0.506108	-0.318535	0.167644	0.0633132	-0.341854	0.179926	-0.205159	-0.174451	-0.141855	-0.125904	-0.122249	-0.0902013	-0.162499	-0.162863	-0.183532
TCGA-FB-A78T-01A	CAFclusterA	TCGA	Abnormal	Normal	Dead	Female	>=65	II	0.145729	-0.0518357	0.0423726	0.0716033	-0.357713	-0.109412	0.0228937	0.00802364	-0.229958	-0.09765	0.187503	-0.134465	0.299523	0.215767	0.101464	-0.288955	-0.0761265	0.186517	-0.57801	0.130205	0.0583058	-0.332764	-0.244994	-0.0322151	-0.268502	-0.247653	-0.102136
TCGA-FB-A7DR-01A	CAFclusterA	TCGA	Normal	Normal	Dead	Male	<65	II	0.147721	0.17398	-0.217658	-0.154244	-0.198887	-0.346571	-0.0166334	-0.364692	0.0546763	0.0129985	0.24309	0.102486	-0.481946	-0.377269	0.223186	0.17183	-0.31584	0.465986	-0.2134	-0.00561163	-0.0611204	0.193585	-0.231618	0.193066	0.0442383	-0.112428	0.120786
TCGA-FB-AAPP-01A	CAFclusterA	TCGA	Normal	Normal	Dead	Male	>=65	II	-0.0622353	-0.0543287	-0.0974551	0.297134	-0.249471	0.320309	-0.0902625	0.249198	0.195167	-0.1836	-0.126907	-0.0462177	-0.640105	0.147951	0.125404	-0.360018	0.310742	-0.327537	0.472645	0.35574	0.24112	-0.466745	-0.0680429	0.0302731	-0.395905	-0.409873	-0.247283
TCGA-FB-AAPQ-01A	CAFclusterA	TCGA	Normal	Abnormal	Dead	Male	>=65	II	-0.0116603	-0.11065	-0.194815	-0.104972	0.0107256	-0.0656053	0.108327	0.190774	0.207943	0.107555	0.106388	-0.163759	0.254967	-0.0543563	0.151309	-0.118472	0.171942	0.203181	0.313398	-0.0325397	0.137039	0.0714484	0.0500331	0.19209	-0.14631	-0.197144	-0.228604
TCGA-FB-AAPS-01A	CAFclusterA	TCGA	Normal	Normal	Live	Female	<65	II	0.173266	-0.344483	-0.489673	-0.456412	-0.294379	-0.484855	-0.258969	-0.502656	-0.271546	-0.0710266	-0.277816	-0.414814	-0.159885	-0.530646	0.0070025	0.0135675	-0.419106	-0.477312	-0.216176	-0.271058	-0.478237	-0.0252198	-0.284727	0.0957714	0.157562	0.195629	0.0633296
TCGA-FB-AAPU-01A	CAFclusterA	TCGA	Normal	Abnormal	Dead	Female	<65	II	0.0538459	-0.260427	-0.292015	0.0277387	-0.254685	-0.152104	-0.132835	0.239699	0.141598	0.037617	-0.075715	-0.138796	-0.200821	0.115687	-0.214299	-0.314927	0.0824491	-0.332483	0.0508081	0.152463	0.0487585	-0.502211	-0.349577	0.0315196	-0.204071	-0.117917	-0.238706
TCGA-FB-AAPY-01A	CAFclusterA	TCGA	Abnormal	Normal	Dead	Male	>=65	II	0.203413	-0.142624	-0.184412	0.235543	-0.0344223	-0.0090594	0.250008	-0.124864	0.139974	0.149611	0.154046	0.189451	0.262139	0.348193	-0.297894	-0.106273	0.17067	0.0502487	-0.568339	-0.230444	-0.124205	-0.00716027	-0.0435091	0.0378449	0.0513873	0.102504	0.102839
TCGA-FB-AAPZ-01A	CAFclusterA	TCGA	Abnormal	Abnormal	Live	Male	<65	II	0.0783345	-0.179088	-0.183929	-0.0242468	-0.33523	-0.39976	-0.169296	-0.375787	-0.27179	0.166046	0.196333	-0.149152	0.236419	-0.300971	0.0537592	0.131587	-0.32498	-0.0685879	-0.275298	-0.186546	-0.1138	0.267648	-0.221628	-0.0394203	0.447299	0.360041	0.246169
TCGA-FB-AAQ0-01A	CAFclusterA	TCGA	Abnormal	Abnormal	Dead	Male	>=65	II	0.0568711	-0.423756	-0.347683	-0.420535	-0.647321	-0.350382	-0.465762	-0.153217	-0.150838	-0.347627	-0.365097	-0.417858	-0.351291	0.0156552	0.0875767	-0.425883	-0.180646	-0.227749	-0.38185	-0.143213	-0.242525	-0.407716	-0.367207	0.079719	-0.404908	-0.387041	-0.417567
TCGA-FB-AAQ1-01A	CAFclusterA	TCGA	Abnormal	Abnormal	Dead	Male	<65	II	-0.0424393	-0.0452945	-0.181112	-0.0685598	-0.0275208	-0.0841471	-0.241396	-0.185742	-0.141692	-0.157062	0.20971	0.0967781	0.0707205	-0.160968	-0.0834174	-0.08811	-0.300931	0.170011	0.267048	-0.222471	-0.253305	0.261833	-0.051361	0.213559	-0.272127	-0.232957	-0.302889
TCGA-FB-AAQ2-01A	CAFclusterA	TCGA	Abnormal	Abnormal	Dead	Female	>=65	II	-0.0186131	-0.367247	0.0885801	-0.183467	-0.516065	0.374524	-0.17053	0.105542	0.0175836	-0.270272	-0.17239	0.272803	-0.740808	0.022368	-0.121913	-0.124754	0.117905	0.234152	0.329605	0.1303	0.0917118	-0.117932	0.117789	-0.139009	-0.234291	-0.218761	-0.228626
TCGA-FB-AAQ3-01A	CAFclusterA	TCGA	Abnormal	Abnormal	Dead	Female	>=65	II	0.12677	0.135367	-0.0326763	0.258294	0.353597	0.278295	0.296422	0.0956301	0.203498	0.140681	0.0923892	0.306626	0.113506	0.225372	0.024011	-0.182205	0.334003	0.021813	0.122306	-0.443279	0.00400018	-0.412231	0.106191	0.19355	-0.401876	-0.427888	-0.405448
TCGA-FB-AAQ6-01A	CAFclusterA	TCGA	Abnormal	Abnormal	Dead	Male	>=65	I	-0.0187257	-0.12145	0.176411	-0.111869	-0.0149795	-0.029743	-0.137869	0.237022	0.0896142	-0.278883	-0.184268	0.111669	0.36915	0.226795	-0.271538	-0.203104	0.241073	0.189678	0.112371	0.0684111	0.487405	-0.212092	0.242422	0.0135011	-0.424818	-0.359141	-0.339095
TCGA-H6-8124-01A	CAFclusterA	TCGA	Abnormal	Abnormal	Live	Female	<65	II	-0.0602927	-0.379189	-0.204958	-0.44603	-0.458574	-0.0912507	-0.468385	-0.157593	-0.196885	-0.256463	-0.396738	-0.293568	-0.438896	-0.147578	0.0523434	-0.301216	-0.281889	-0.508718	0.310599	-0.0131851	-0.42914	-0.231059	-0.0554398	-0.32032	-0.272512	-0.323695	-0.234622
TCGA-H6-A45N-01A	CAFclusterA	TCGA	Abnormal	Normal	Dead	Female	>=65	II	0.207918	0.0180281	0.047136	0.167593	0.371403	0.0905681	0.294251	-0.191448	-0.351024	0.162494	0.297343	-0.180056	0.647566	-0.167565	-0.0325356	0.383699	0.139481	0.0128157	-0.579289	0.100194	-0.136239	0.0317371	0.0939057	-0.0281706	0.331201	0.400695	0.359522
TCGA-H8-A6C1-01A	CAFclusterA	TCGA	Abnormal	Abnormal	Live	Male	<65	II	0.119716	-0.351473	-0.411108	-0.0535762	0.0748996	-0.339541	-0.0964068	-0.429484	-0.154679	-0.064618	0.113101	-0.0894814	-0.0335505	0.333197	-0.263537	-0.291656	-0.272561	-0.147491	-0.211178	-0.194417	-0.105044	0.0133309	-0.0274903	-0.26741	-0.1615	-0.0523993	0.00678949
TCGA-HV-A5A3-01A	CAFclusterA	TCGA	Abnormal	Abnormal	Dead	Male	<65	II	0.145357	-0.485841	-0.49824	-0.489347	-0.579449	-0.546889	-0.595638	-0.574513	-0.526694	-0.166332	-0.110941	-0.278869	-0.315858	-0.331243	-0.0551542	-0.272952	-0.552457	-0.224754	-0.608718	-0.377997	-0.19651	-0.261586	-0.116461	-0.0932749	-0.172191	-0.242096	-0.0790434
TCGA-HV-A5A4-01A	CAFclusterA	TCGA	Normal	Normal	Live	Female	>=65	II	0.160155	-0.215296	-0.159606	0.0124307	-0.312283	0.0190718	0.0763962	0.0105857	-0.0990602	-0.130673	0.0325639	-0.191356	0.375044	0.257446	-0.047311	-0.0107449	0.138508	-0.357151	-0.590621	0.168998	0.0439077	-0.358862	0.0344203	-0.353801	-0.333564	-0.231361	-0.181986
TCGA-HV-A5A5-01A	CAFclusterA	TCGA	Normal	Normal	Live	Female	<65	II	0.169999	0.463321	0.457956	0.421653	0.417725	0.473653	0.437817	0.387663	0.244131	0.19415	0.62113	0.218089	0.612384	0.310738	-0.0623937	0.312702	0.446755	0.507359	-0.276683	0.246274	0.263599	0.00830476	0.183016	0.232713	0.288669	0.258171	0.143745
TCGA-HV-A5A6-01A	CAFclusterA	TCGA	Abnormal	Abnormal	Dead	Female	>=65	II	0.1623	-0.396875	-0.378078	-0.512236	-0.387834	-0.362507	-0.3855	-0.432463	-0.19962	-0.345896	-0.545571	-0.356181	-0.156024	-0.380025	-0.122232	-0.296635	-0.190405	-0.36133	-0.066008	-0.339223	-0.299122	-0.445938	-0.248877	0.00423984	-0.231715	-0.268179	-0.1798
TCGA-HV-A7OL-01A	CAFclusterA	TCGA	Abnormal	Abnormal	Live	Male	>=65	II	0.0259662	-0.170065	-0.170023	-0.174878	-0.484755	-0.186531	0.0166474	-0.376705	0.0353193	-0.208333	-0.453058	0.0679133	-0.384875	-0.378878	-0.319754	-0.20794	0.156346	0.0920246	-0.37713	-0.328956	-0.187746	-0.248335	0.0796244	-0.146111	-0.107426	0.0999578	-0.106469
TCGA-HV-A7OP-01A	CAFclusterB	TCGA	Normal	Abnormal	Live	Male	>=65	II	0.332854	0.0906273	-0.0983444	0.0356936	-0.0992809	-0.178263	-0.22183	-0.0590188	0.0183497	-0.164252	-0.113068	0.174382	-0.115409	-0.167821	-0.308305	-0.234224	-0.0357695	0.068477	-0.283806	-0.285949	0.185037	-0.453762	-0.121694	-0.1773	-0.504707	-0.456983	-0.398462
TCGA-HV-AA8V-01A	CAFclusterA	TCGA	Normal	Normal	Live	Male	<65	II	0.14375	-0.0247563	-0.374415	-0.325678	-0.0546217	-0.490306	-0.268895	-0.344927	-0.305445	0.0979464	-0.220209	-0.2966	0.325722	-0.238055	-0.23129	-0.161819	-0.382673	-0.030169	-0.420698	0.0219605	-0.437797	0.441303	-0.0440965	-0.00103129	-0.178239	-0.130314	-0.172704
TCGA-HV-AA8X-01A	CAFclusterA	TCGA	Abnormal	Abnormal	Dead	Female	>=65	II	0.150506	-0.396299	-0.105437	0.0737961	0.159054	0.304427	0.23433	0.429955	0.303559	-0.123294	0.201941	-0.0811676	0.0234583	0.0741749	-0.309801	-0.217728	0.25695	0.0797985	-0.272749	0.115246	0.242531	0.0363417	-0.0733502	-0.230882	-0.406807	-0.237192	-0.289667
TCGA-HZ-7289-01A	CAFclusterA	TCGA	Normal	Normal	Dead	Male	>=65	II	0.0810044	0.2423	-0.0482733	-0.152022	0.0626957	-0.0607244	-0.126548	0.035197	-0.0295287	0.0210734	-0.391988	0.0140654	-0.632247	-0.00961554	-0.127813	-0.146031	-0.0168174	-0.294078	0.514088	0.0735573	0.234972	0.0918996	0.207125	-0.0400241	-0.303708	-0.232623	-0.0641066
TCGA-HZ-7918-01A	CAFclusterA	TCGA	Normal	Normal	Live	Male	>=65	II	0.18931	0.336901	0.409776	0.317211	0.459623	0.297066	0.478887	0.511408	0.059759	0.0505121	0.384886	0.0467398	0.0665798	0.136123	0.0474206	0.224225	0.213156	-0.0498555	0.465758	0.313705	0.245547	0.0629358	0.152302	-0.0371954	0.323286	0.223087	0.213989
TCGA-HZ-7919-01A	CAFclusterA	TCGA	Normal	Abnormal	Dead	Female	<65	II	0.114073	-0.11274	0.162597	-0.0806969	0.0560308	0.0171485	0.150806	0.195471	0.0636241	0.0526717	0.273916	-0.206282	-0.227753	0.0684348	0.0167394	0.138853	0.167427	-0.130986	-0.188296	0.144043	0.0672321	0.205325	0.0581861	-0.144496	0.246665	0.174029	0.191083
TCGA-HZ-7922-01A	CAFclusterA	TCGA	Abnormal	Abnormal	Live	Female	<65	II	0.0994679	-0.267302	-0.111576	-0.205425	-0.00456802	-0.0957243	-0.298349	0.114758	-0.204677	-0.142817	-0.309429	-0.358138	-0.185685	-0.108212	0.0987751	0.166255	-0.194906	-0.455842	0.312561	-0.0244371	-0.105498	0.0283363	0.161254	-0.0749215	0.213549	0.237009	0.23198
TCGA-HZ-7925-01A	CAFclusterA	TCGA	Abnormal	Abnormal	Dead	Male	>=65	II	0.156863	-0.309166	-0.05437	-0.342003	-0.0691363	-0.395462	-0.178203	-0.284735	-0.293069	-0.395094	-0.449556	-0.283829	-0.225647	-0.0867725	-0.3205	0.11972	-0.391797	-0.184005	0.0850456	-0.222046	-0.230522	0.0715313	0.137587	-0.0337159	0.120821	0.125743	0.0838816
TCGA-HZ-7926-01A	CAFclusterA	TCGA	Abnormal	Abnormal	Dead	Male	<65	II	0.0869724	0.116276	0.146776	0.233736	0.175631	-0.0451632	-0.146144	0.0764609	-0.13124	0.058672	0.356405	0.0993404	-0.257234	-0.0527628	-0.0113665	-0.0530153	-0.281504	-0.0863076	0.161209	-0.0937303	0.218358	0.33887	0.00522165	-0.154411	0.302703	0.383075	0.100384
TCGA-HZ-8001-01A	CAFclusterA	TCGA	Normal	Normal	Live	Male	>=65	III	0.0999736	0.131315	0.274033	0.189074	0.438589	0.124656	0.36055	0.0145727	0.173791	0.223874	-0.1606	0.265718	0.0086153	-0.0975684	0.134381	0.3422	0.230298	0.195812	0.517186	-0.134573	0.035716	0.233114	0.171754	0.0983619	0.0226179	0.014373	0.00478324
TCGA-HZ-8003-01A	CAFclusterA	TCGA	Normal	Normal	Dead	Female	>=65	II	0.248924	0.480639	0.338837	0.198835	0.161753	0.462605	0.402206	0.344693	-0.0913263	0.210767	0.351889	-0.281407	0.0733194	0.274529	0.333607	0.317918	0.237447	-0.234472	0.373546	0.294307	0.297462	0.0684952	0.449563	0.0300862	0.361737	0.354261	0.313889
TCGA-HZ-8315-01A	CAFclusterA	TCGA	Abnormal	Normal	Dead	Female	<65	II	0.0481615	-0.317939	-0.119668	0.0506347	-0.171571	-0.178779	-0.262052	-0.107698	-0.320365	-0.131215	-0.104068	-0.205537	0.23664	-0.273513	0.082689	-0.223879	-0.276355	-0.357437	0.0208437	-0.297291	-0.326317	-0.306428	-0.0897652	-0.134224	0.236043	0.212513	-0.0277521
TCGA-HZ-8317-01A	CAFclusterA	TCGA	Normal	Normal	Dead	Female	>=65	II	0.15657	0.535886	0.41645	0.442304	0.407037	0.528309	0.29744	0.63409	0.360348	0.253739	0.517581	0.141756	-0.241608	0.360516	0.0713271	0.0238872	0.264751	0.171828	0.605031	0.16423	0.266215	0.524883	0.277538	-0.131359	-0.0852212	-0.127232	0.0464464
TCGA-HZ-8636-01A	CAFclusterA	TCGA	Abnormal	Abnormal	Dead	Female	<65	IV	-0.0162863	-0.503969	-0.412317	-0.394997	-0.297171	-0.394803	-0.223325	-0.300161	-0.452892	-0.372721	-0.253954	-0.427989	-0.149422	-0.185826	-0.0528575	-0.0784418	-0.313644	-0.537616	0.180031	-0.0415741	-0.190758	-0.0961208	-0.314396	-0.0127271	0.263381	0.227461	0.114605
TCGA-HZ-8637-01A	CAFclusterA	TCGA	Abnormal	Normal	Dead	Female	>=65	II	0.125063	-0.0334962	0.00186538	-0.146696	-0.0849327	0.107308	0.12315	-0.0942439	-0.100018	0.0764676	-0.0641353	-0.402573	-0.432325	-0.171085	0.288446	-0.00607307	-0.178342	-0.388792	0.0281265	0.077	-0.104119	-0.143367	0.243682	0.207027	0.356846	0.296729	0.209397
TCGA-HZ-A49G-01A	CAFclusterA	TCGA	Normal	Normal	Live	Female	<65	II	0.216372	0.367932	0.334108	0.544821	0.291055	0.468013	0.303551	0.325758	0.14819	0.388	0.434323	0.0816115	0.64436	0.255648	-0.12189	0.273901	0.311745	0.175375	-0.584769	0.234115	-0.0715148	0.18942	0.0765431	-0.125159	0.308615	0.252479	0.38419
TCGA-HZ-A49H-01A	CAFclusterB	TCGA	Normal	Normal	Live	Female	>=65	II	0.188283	0.519351	0.337862	0.512427	0.481479	0.448067	0.473215	0.396543	0.174032	0.255556	0.374397	0.331302	0.198759	0.328625	0.0178705	0.441722	0.446344	0.240891	0.269353	-0.36069	0.193652	0.399778	0.0204564	0.220401	0.104963	0.0257074	0.132034
TCGA-HZ-A49I-01A	CAFclusterA	TCGA	Abnormal	Abnormal	Dead	Male	>=65	II	0.0494146	0.0917266	-0.11938	-0.252062	-0.117956	-0.422515	-0.161805	-0.411079	-0.305294	-0.22796	-0.281132	0.00674782	0.429882	-0.111738	0.0528623	0.0422109	-0.382905	0.0656547	-0.543701	-0.387546	-0.223847	-0.282563	-0.153021	0.0184735	0.0738853	0.147196	0.0262869
TCGA-HZ-A4BH-01A	CAFclusterA	TCGA	Abnormal	Normal	Live	Male	>=65	II	0.0847263	-0.176963	-0.32194	-0.342263	0.258088	-0.445822	0.0616412	-0.172541	-0.1613	0.121503	-0.0930095	-0.344585	0.135084	-0.420794	0.104783	0.311173	-0.37039	-0.370772	-0.306733	-0.16173	-0.0111838	-0.167888	-0.340317	0.213503	0.537087	0.507848	0.309553
TCGA-HZ-A4BK-01A	CAFclusterA	TCGA	Abnormal	Abnormal	Live	Male	>=65	II	0.0648941	-0.435559	0.0632147	0.119079	0.393426	-0.294467	-0.0437545	-0.19569	-0.224001	-0.0502063	0.347814	-0.106001	0.524339	-0.223189	0.263393	0.0301855	-0.120075	-0.00883489	-0.601019	0.0992511	-0.160673	0.315606	-0.241574	-0.192695	0.100973	0.202473	0.11773
TCGA-HZ-A77O-01A	CAFclusterA	TCGA	Abnormal	Normal	Dead	Female	>=65	II	0.0562356	0.235051	0.0565643	0.146129	-0.196427	0.387	0.183374	0.351019	0.358793	-0.110345	-0.00400523	0.108195	-0.432856	0.30288	-0.0477568	-0.188988	0.195721	0.0574708	0.476906	0.328858	0.172265	-0.118722	0.096011	-0.108	-0.347382	-0.350667	-0.312187
TCGA-HZ-A77P-01A	CAFclusterA	TCGA	Normal	Normal	Live	Male	>=65	II	0.20444	0.084684	0.394867	0.437777	0.189308	0.419225	0.235836	0.462687	0.36819	0.189372	0.393947	0.14461	0.140597	-0.268375	0.386468	0.317494	0.330553	0.254117	-0.446663	0.249464	0.117037	0.239301	-0.130548	-0.115586	-0.12599	-0.152125	0.0717209
TCGA-HZ-A77Q-01A	CAFclusterA	TCGA	Abnormal	Normal	Live	Female	<65	II	0.163649	-0.347632	-0.338992	-0.327136	-0.241653	-0.431457	-0.120224	-0.4427	-0.191863	0.100612	-0.234793	-0.308796	-0.249431	-0.316	-0.00293955	0.128686	-0.437379	-0.240482	-0.163682	-0.374584	-0.302236	0.329355	0.0783932	-0.174126	0.430706	0.468269	0.303632
TCGA-HZ-A8P1-01A	CAFclusterA	TCGA	Normal	Abnormal	Live	Male	>=65	I	0.00963867	-0.352681	-0.00802881	0.274585	-0.356387	0.0867264	0.0658835	0.37126	0.261337	-0.209573	-0.0866783	-0.17649	-0.315261	0.0784198	-0.229583	-0.360215	0.342887	-0.122111	0.296682	0.275514	0.185194	-0.331995	-0.161606	-0.000216065	-0.395	-0.344436	-0.253226
TCGA-HZ-A9TJ-01A	CAFclusterA	TCGA	Abnormal	Abnormal	Live	Male	>=65	IV	-0.11336	0.263206	0.0656341	0.0501108	-0.391881	0.22372	-0.223845	0.129904	0.0200642	-0.134075	-0.137619	-0.0965727	0.168184	0.317091	-0.0238695	-0.287822	0.0319572	0.0223924	-0.151391	-0.0510899	0.211589	-0.420364	-0.274849	0.343	-0.321738	-0.372755	-0.412088
TCGA-IB-7644-01A	CAFclusterA	TCGA	Abnormal	Abnormal	Dead	Female	>=65	IV	0.15586	-0.369251	0.115209	0.165731	0.10961	0.346523	-0.0500513	0.372739	-0.0114965	0.12775	0.152916	-0.0791592	-0.337178	-0.0598874	-0.141608	-0.0951165	0.298783	0.0793951	-0.351436	0.270424	-0.0234968	0.0463139	0.200902	-0.190452	0.0515257	-0.0337741	-0.084385
TCGA-IB-7645-01A	CAFclusterA	TCGA	Normal	Normal	Dead	Female	<65	II	0.169285	-0.179765	0.282083	0.0290324	0.246209	6.83e-05	0.189983	0.223585	0.0421065	0.327525	0.100169	-0.16147	-0.212342	-0.0781166	-0.036303	0.297228	-0.0100261	-0.113526	-0.0188207	-0.0858691	-0.216688	0.364385	-0.0233861	-0.0469034	0.465837	0.453231	0.359114
TCGA-IB-7646-01A	CAFclusterA	TCGA	Abnormal	Abnormal	Dead	Male	<65	II	0.0923331	-0.136639	-0.190346	-0.500767	0.000714213	-0.377629	-0.275249	-0.176927	-0.153759	-0.356215	-0.376631	-0.41849	-0.633076	-0.419806	0.0984704	-0.0279463	-0.262225	-0.152651	0.522766	-0.098464	-0.0193373	0.0891267	-0.0587466	0.15722	0.0186035	0.0884757	-0.122167
TCGA-IB-7649-01A	CAFclusterA	TCGA	Abnormal	Normal	Dead	Female	>=65	II	0.221182	0.395082	0.48085	0.431532	0.630856	0.419675	0.379322	0.569644	0.0971559	0.356222	0.500132	0.116454	0.324652	0.248367	0.0474095	0.373983	0.338285	0.203189	0.276111	0.0835895	0.0852576	0.503683	0.233535	-0.00141625	0.147656	0.208922	0.148311
TCGA-IB-7651-01A	CAFclusterA	TCGA	Normal	Normal	Dead	Female	<65	II	0.115865	0.219312	0.0838091	-0.119584	0.272562	0.0333399	-0.155133	0.0930378	-0.0459318	-0.0050858	-0.0601869	-0.212262	-0.21264	0.0209881	0.0704892	-0.0572319	-0.199369	-0.249216	0.433502	0.0277403	0.0401769	-0.0243381	0.27619	0.12309	0.116812	0.115384	0.112052
TCGA-IB-7654-01A	CAFclusterA	TCGA	Abnormal	Normal	Dead	Male	>=65	II	0.180768	0.259767	-0.0651017	-0.0523026	-0.098056	-0.0252151	-0.0756915	0.132586	-0.105028	-0.0515585	0.0424591	-0.330846	-0.494264	0.0095882	0.0595525	0.217157	-0.0151472	-0.46049	0.277435	0.147592	0.061542	-0.0400557	-0.0021627	0.19627	-0.0350117	0.0238698	0.00584824
TCGA-IB-8126-01A	CAFclusterB	TCGA	Normal	Normal	Live	Female	>=65	III	0.187386	0.563031	0.456013	0.472233	0.416544	0.51259	0.282591	0.427037	0.0710972	0.316883	0.645859	-0.0154894	0.384213	0.363729	0.362154	0.281125	0.262129	-0.0662309	0.612322	0.00545107	0.183124	0.108651	0.317212	0.0378889	0.296924	0.18697	0.212834
TCGA-IB-8127-01A	CAFclusterA	TCGA	Abnormal	Abnormal	Live	Male	<65	II	0.0343266	-0.186149	-0.50961	-0.41736	-0.397123	-0.42289	-0.316136	-0.37321	-0.264539	-0.0262307	-0.0463793	-0.368861	-0.229126	-0.035911	-0.245325	-0.194697	-0.311694	-0.328185	-0.215736	-0.0540112	-0.16045	-0.334151	-0.287248	0.00892312	0.349865	0.11838	0.0811047
TCGA-IB-A5SO-01A	CAFclusterA	TCGA	Normal	Normal	Dead	Male	>=65	II	0.177601	-0.350249	-0.397101	-0.353884	-0.298054	-0.349605	-0.00214509	-0.442094	-0.426933	-0.10736	-0.073192	-0.319337	0.492394	-0.397595	0.144037	0.232326	-0.219338	-0.310188	-0.512639	-0.391182	-0.31618	-0.131271	-0.324641	-0.0752168	0.280548	0.38374	0.17875
TCGA-IB-A5SP-01A	CAFclusterA	TCGA	Abnormal	Abnormal	Live	Male	>=65	II	0.115209	-0.0431925	0.0649799	0.281543	0.0532213	0.446024	0.00698494	0.371218	0.368138	0.239587	0.328805	-0.100737	-0.213457	0.154825	0.0831077	-0.238292	0.457588	0.127499	-0.547363	0.0321349	0.252459	-0.329629	0.0421451	0.0115344	-0.319529	-0.19014	-0.133763
TCGA-IB-A5SQ-01A	CAFclusterA	TCGA	Normal	Normal	Dead	Female	<65	I	0.176056	-0.0932134	-0.145531	-0.294609	0.0184571	-0.321349	0.0874665	-0.329637	-0.0318638	0.0549944	-0.171953	-0.12681	-0.105416	-0.350629	0.0228153	0.365905	-0.251594	-0.241306	0.128268	-0.199231	-0.286371	0.400177	-0.208243	-0.222058	0.295461	0.20086	0.111191
TCGA-IB-A5SS-01A	CAFclusterA	TCGA	Abnormal	Normal	Dead	Female	<65	II	0.175117	-0.0459681	-0.303301	-0.474387	-0.328207	-0.501059	-0.307895	-0.486469	-0.337218	-0.0566502	-0.502805	0.133589	-0.580731	-0.265938	-0.194461	0.02867	-0.488498	0.231072	-0.0549003	-0.160029	-0.141522	0.272632	-0.117089	-0.0361824	0.176644	0.214581	-0.0152509
TCGA-IB-A6UF-01A	CAFclusterA	TCGA	Abnormal	Abnormal	Live	Male	<65	II	0.0516725	-0.428291	-0.401709	-0.381082	-0.453705	-0.401699	-0.415991	-0.476356	-0.234089	-0.379891	-0.00892997	-0.134078	-0.189331	-0.17416	-0.0456649	-0.450631	-0.422529	0.0627537	0.496349	-0.116176	-0.22291	0.164783	-0.338075	0.164841	-0.41351	-0.401873	-0.409289
TCGA-IB-A6UG-01A	CAFclusterA	TCGA	Abnormal	Normal	Dead	Male	>=65	II	0.0233898	0.0328671	-0.186207	-0.0555124	-0.491273	0.00416812	-0.250824	-0.0668185	-0.213764	-0.362372	0.190184	-0.0894703	0.36229	0.0831374	-0.103145	-0.33076	-0.293946	-0.145293	0.397287	0.0553303	-0.110525	-0.532842	-0.147918	-0.178782	-0.026233	-0.0319457	-0.0988706
TCGA-IB-A7LX-01A	CAFclusterA	TCGA	Normal	Abnormal	Dead	Male	<65	II	0.109077	-0.51721	-0.599278	-0.518382	-0.651661	-0.454313	-0.55991	-0.508521	-0.470795	-0.502245	-0.288784	-0.358776	-0.351081	-0.528864	-0.101533	-0.410752	-0.550629	-0.216594	-0.432387	-0.11174	-0.319091	-0.259629	-0.181058	-0.151533	-0.208626	-0.313282	-0.282513
TCGA-IB-A7M4-01A	CAFclusterA	TCGA	Abnormal	Abnormal	Live	Male	>=65	II	0.109231	-0.243255	-0.301087	-0.1961	-0.466514	0.0306186	-0.279132	0.0953132	0.135621	-0.195429	0.0799589	0.00488776	-0.519106	0.0164069	-0.325477	-0.321785	0.116205	-0.0103155	-0.311291	0.0399014	0.422483	-0.283199	-0.115483	-0.160539	0.0717463	-0.139612	-0.0299812
TCGA-IB-AAUN-01A	CAFclusterA	TCGA	Abnormal	Abnormal	Dead	Female	>=65	I	0.170367	0.0607554	-0.476258	-0.275493	-0.343818	-0.415274	-0.236533	-0.444254	-0.214558	-0.158223	-0.11051	0.203761	-0.244115	-0.235006	0.134108	-0.151907	-0.528612	0.174594	-0.00141802	-0.153788	-0.0269286	-0.137557	-0.459067	-0.292359	-0.128031	-0.204747	-0.233164
TCGA-IB-AAUO-01A	CAFclusterA	TCGA	Normal	Abnormal	Dead	Female	<65	II	0.13817	-0.340945	-0.443456	-0.540097	-0.444267	-0.577435	-0.31681	-0.580182	-0.371097	-0.400462	-0.148889	-0.0839111	-0.401699	-0.37449	0.127687	-0.337147	-0.577651	0.0256505	-0.20717	-0.393635	-0.279285	-0.400462	-0.133279	-0.102857	-0.142951	-0.201916	-0.269416
TCGA-IB-AAUP-01A	CAFclusterA	TCGA	Normal	Normal	Live	Male	>=65	II	0.215022	-0.443682	-0.440158	-0.372243	-0.253386	-0.498771	0.0277608	-0.547153	-0.522368	-0.369478	-0.486577	-0.305283	-0.430485	-0.460597	-0.189168	0.0461025	-0.447692	-0.529989	-0.323607	-0.0874812	-0.389667	-0.254968	-0.299545	-0.250229	0.483062	0.519976	0.373047
TCGA-IB-AAUQ-01A	CAFclusterB	TCGA	Normal	Abnormal	Dead	Male	<65	II	0.0557804	0.0281691	-0.30296	-0.511017	0.201174	-0.284352	-0.26544	-0.441743	-0.0272057	-0.0923283	-0.183733	0.036119	0.319976	-0.0129495	-0.154125	0.0202143	-0.204629	-0.0854934	-0.250139	-0.33908	-0.0991279	0.303114	0.0172806	0.0843483	-0.370588	-0.345028	-0.347635
TCGA-IB-AAUS-01A	CAFclusterA	TCGA	Normal	Normal	Live	Female	>=65	II	0.229735	-0.268428	-0.294956	-0.258099	0.443647	-0.411241	-0.132982	-0.501147	-0.279377	-0.00396968	-0.350008	-0.131555	-0.231903	-0.347374	-0.112147	0.12431	-0.42023	-0.192355	0.0387619	-0.377102	-0.395664	0.538165	0.022602	0.209083	0.25061	0.394012	0.198152
TCGA-IB-AAUT-01A	CAFclusterA	TCGA	Normal	Normal	Live	Male	>=65	II	0.183299	0.456718	0.276778	0.231137	0.551433	0.387188	0.0677613	0.0571024	-0.0907972	-0.00771926	0.360984	-0.0094365	0.439474	0.086455	-0.121816	0.185429	0.313189	-0.0967286	-0.434409	-0.0410927	-0.162368	0.352125	0.0876021	-0.0460563	0.290548	0.243912	0.119656
TCGA-IB-AAUU-01A	CAFclusterA	TCGA	Abnormal	Abnormal	Live	Male	<65	II	0.204527	-0.305838	-0.100357	0.0817304	-0.158345	-0.14561	0.0832385	-0.117797	-0.0111329	0.224383	0.184495	-0.0127022	0.313522	0.167629	0.0601143	-0.0506719	0.0679601	0.0571611	-0.382399	-0.34391	-0.024988	-0.259251	-0.0375433	0.0420165	0.150141	0.198641	0.0969342
TCGA-IB-AAUW-01A	CAFclusterB	TCGA	Normal	Normal	Dead	Female	<65	II	0.145131	0.380218	0.404484	0.56883	0.541454	0.52022	0.417491	0.523556	0.220737	0.375893	0.42492	0.079448	0.409304	0.365129	0.188919	0.295198	0.485606	0.253005	0.133216	0.174684	0.0737276	0.389561	0.0195154	-0.12111	0.0609063	0.139376	0.112218
TCGA-LB-A7SX-01A	CAFclusterA	TCGA	Abnormal	Normal	Dead	Female	>=65	II	0.0577162	-0.23186	0.148008	0.110922	0.143725	0.360049	-0.145179	0.0233613	-0.0584081	-0.243733	-0.469171	0.283929	-0.198928	-0.109654	-0.27565	-0.369194	0.0463564	0.070718	-0.217523	0.0850581	0.12434	-0.384658	-0.186557	-0.338869	-0.368103	-0.301158	-0.242271
TCGA-LB-A8F3-01A	CAFclusterB	TCGA	Normal	Normal	Live	Female	<65	II	0.12665	0.422427	-0.125056	0.138464	0.416989	0.0871753	-0.0448847	-0.05574	0.0535085	0.0943831	0.0581705	-0.111698	0.555454	-0.00532363	0.0399344	-0.0679002	0.0203993	-0.108443	0.441298	-0.0047963	0.087056	-0.18961	0.334527	0.0256196	-0.495081	-0.469618	-0.444687
TCGA-LB-A9Q5-01A	CAFclusterA	TCGA	Normal	Normal	Dead	Female	<65	II	0.133782	0.560251	0.561426	0.476749	0.296169	0.611287	0.366591	0.565956	0.311936	0.258019	0.41183	0.29799	0.190134	0.446594	0.209373	0.372477	0.413129	0.368058	0.610276	0.236601	0.411373	0.31038	0.515705	0.21375	0.0434868	0.0282977	0.0312443
TCGA-M8-A5N4-01A	CAFclusterA	TCGA	Abnormal	Normal	Live	Female	<65	II	0.0752384	-0.514371	-0.432728	-0.527276	-0.523884	-0.517961	-0.341216	-0.508795	-0.390826	-0.293992	-0.53642	-0.428992	-0.723983	-0.357765	-0.100697	-0.293116	-0.47171	-0.369485	-0.50127	-0.213291	-0.422459	-0.306734	-0.386465	0.0411748	0.0946134	0.249505	0.113968
TCGA-OE-A75W-01A	CAFclusterA	TCGA	Abnormal	Abnormal	Dead	Male	>=65	II	-0.0206528	-0.0785681	-0.368952	-0.308072	-0.102717	-0.300578	-0.319896	-0.49741	-0.290532	-0.214655	-0.443952	0.165171	0.177291	-0.225336	-0.122969	-0.168734	-0.108092	0.111115	-0.467664	-0.39836	-0.178301	-0.385686	0.213242	0.161376	-0.261403	-0.430618	-0.291421
TCGA-PZ-A5RE-01A	CAFclusterA	TCGA	Abnormal	Abnormal	Dead	Female	<65	II	0.188488	-0.191806	-0.323293	-0.213341	-0.134758	-0.414741	-0.00991824	-0.455582	0.0107421	0.137152	-0.0123174	0.17075	-0.300356	-0.404301	-0.170962	-0.0891652	-0.04016	0.145303	-0.303516	-0.331927	0.0458571	0.0880076	0.17534	0.00680277	-0.0958598	0.126653	0.0235698
TCGA-Q3-AA2A-01A	CAFclusterA	TCGA	Normal	Abnormal	Live	Female	<65	I	0.19305	-0.317174	-0.206755	-0.228265	-0.305802	-0.379194	-0.146246	-0.351457	-0.129371	0.0674839	-0.208287	0.0495608	-0.170405	0.155093	-0.274058	-0.294466	-0.201328	0.120554	-0.177232	-0.318058	0.0580757	-0.296636	-0.416493	-0.173521	-0.369499	-0.260881	-0.244489
TCGA-RB-A7B8-01A	CAFclusterA	TCGA	Normal	Normal	Dead	Female	>=65	II	0.096683	-0.243324	-0.191947	0.16805	0.308598	-0.199465	-0.0188818	-0.213201	-0.118272	-0.0548204	-0.372293	-0.0402906	0.263485	0.0228277	0.0641506	-0.173938	-0.187972	-0.200695	0.128949	-0.298835	-0.105769	-0.243655	-0.251513	-0.0417477	-0.0290727	-0.00925377	-0.131342
TCGA-RB-AA9M-01A	CAFclusterA	TCGA	Normal	Normal	Live	Male	<65	II	0.144414	-0.0073246	0.331488	0.13353	0.364576	0.103226	-0.0804392	0.231341	-0.05146	-0.165468	0.0939525	-0.0656391	0.461706	-0.00749583	0.0353521	0.10615	0.188709	-0.213245	0.260821	0.262181	-0.119217	-0.147991	0.0614569	0.0368368	0.0930654	-0.0454292	-0.301653
TCGA-S4-A8RO-01A	CAFclusterA	TCGA	Abnormal	Abnormal	Live	Female	>=65	II	0.0319263	-0.0741036	0.0141498	-0.297225	-0.383004	0.0643806	-0.00432962	0.0599924	0.199124	-0.0866173	0.151798	0.0156444	-0.133049	-0.0439538	-0.25854	-0.225398	0.320774	0.147102	0.173041	0.159413	0.157779	-0.126187	-0.563537	-0.126626	-0.26845	-0.307345	-0.187446
TCGA-S4-A8RP-01A	CAFclusterA	TCGA	Normal	Abnormal	Dead	Female	>=65	II	0.128314	-0.121557	-0.242199	0.112335	-0.153565	-0.303507	0.145619	-0.15424	-0.338412	0.11655	-0.0299783	-0.15494	0.636806	0.0158051	-0.0867412	-0.0565482	-0.0561435	-0.0158065	-0.440203	0.0028893	-0.180645	-0.164568	-0.498316	-0.308547	-0.110121	-0.178445	-0.0363111
TCGA-US-A774-01A	CAFclusterA	TCGA	Normal	Normal	Dead	Female	>=65	II	0.0898241	0.458485	0.335183	0.543421	0.526712	0.48269	0.416191	0.352654	0.284781	0.328217	0.320977	0.196423	0.245582	0.278357	-0.231447	0.180952	0.342368	0.274169	-0.0453731	0.321299	0.259883	0.535927	0.389233	-0.347819	0.221912	0.258686	0.315003
TCGA-US-A776-01A	CAFclusterB	TCGA	Normal	Normal	Live	Male	<65	II	0.126508	0.118776	-0.0768669	-0.243089	-0.099786	-0.0651315	-0.166483	0.12537	0.0404528	-0.137818	-0.559974	-0.194848	-0.42918	-0.0167626	-0.0230002	-0.344706	0.0733737	-0.321867	0.356286	-0.109746	0.0603407	-0.448491	0.0749026	-0.176711	-0.480589	-0.473933	-0.379197
TCGA-US-A779-01A	CAFclusterB	TCGA	Abnormal	Abnormal	Dead	Female	<65	II	-0.0521447	0.291483	0.139418	0.300297	0.413089	0.214733	0.1059	0.107199	0.20905	0.212849	0.452856	0.256996	0.0770051	0.132822	-0.366587	-0.240986	0.466752	0.190872	-0.501552	0.0643559	0.184556	-0.424015	0.0558288	-0.157852	-0.443688	-0.320126	-0.349829
TCGA-US-A77E-01A	CAFclusterA	TCGA	Normal	Normal	Dead	Male	>=65	II	0.040192	-0.382529	-0.422	-0.133779	-0.461472	-0.282855	-0.461037	-0.418015	-0.244494	-0.120102	-0.062906	-0.227281	0.217213	-0.178834	-0.0961673	-0.410429	-0.155209	-0.301052	-0.120908	-0.178795	-0.347823	-0.211818	0.367097	-0.0664302	-0.267549	-0.083893	-0.212101
TCGA-US-A77G-01A	CAFclusterB	TCGA	Normal	Abnormal	Dead	Male	<65	II	0.00828412	-0.0527701	0.0484019	0.222923	-0.350658	0.217923	-0.125126	0.22944	-0.147485	0.0276589	-0.0950464	-0.00391325	-0.0780811	0.19151	-0.035622	-0.342394	0.278857	-0.0681485	-0.555548	0.160038	0.0488338	-0.397699	-0.2656	0.000495512	-0.239319	-0.0885255	-0.157304
TCGA-XD-AAUH-01A	CAFclusterB	TCGA	Normal	Normal	Live	Female	<65	II	0.199822	-0.0373118	0.0939244	0.0454361	-0.169102	-0.0298323	0.279177	0.0260963	0.206841	0.100307	-0.0429763	-0.017009	-0.067198	-0.211834	-0.121196	0.353189	0.0993674	0.0803246	0.0320132	-0.113752	-0.110696	0.0327067	-0.291814	-0.147395	0.346759	0.369791	0.17845
TCGA-XD-AAUI-01A	CAFclusterA	TCGA	Abnormal	Abnormal	Dead	Female	<65	II	0.176558	0.217877	-0.125255	-0.349183	-0.184155	-0.318845	0.132116	-0.097193	0.324829	0.175912	0.262922	-0.0884469	0.292127	-0.0350706	-0.116509	0.115516	0.20284	0.0923438	-0.492156	-0.0953909	0.320818	-0.103567	-0.392388	0.25822	0.294893	0.379557	0.180615
TCGA-XD-AAUL-01A	CAFclusterA	TCGA	Abnormal	Abnormal	Live	Male	<65	II	0.13761	-0.204374	-0.427314	-0.322345	-0.040058	-0.489121	-0.130268	-0.394639	-0.221703	0.099039	-0.191131	-0.0460897	-0.0296423	-0.186231	-0.115642	-0.125285	-0.371648	0.056482	-0.598627	-0.0242019	-0.307236	-0.329775	0.0709109	0.121659	0.194146	0.106497	0.0688279
TCGA-XN-A8T3-01A	CAFclusterA	TCGA	Abnormal	Abnormal	Live	Male	>=65	I	0.0932438	-0.143928	-0.0494615	-0.0565894	-0.358532	-0.138974	-0.0372659	-0.237223	-0.318827	-0.122056	-0.0783201	-0.178217	0.584896	-0.174177	-0.194228	-0.273488	-0.0874521	-0.0146499	-0.0953633	0.267171	-0.313415	-0.207804	0.0508704	-0.337745	-0.12494	-0.248236	-0.201479
TCGA-YB-A89D-01A	CAFclusterA	TCGA	Normal	Abnormal	Live	Male	<65	II	0.134967	-0.146989	-0.015853	-0.0734849	0.405386	-0.0699956	0.359129	-0.143212	0.142804	0.238343	0.0736814	0.016854	0.142431	-0.242155	0.0126111	0.315738	0.15031	0.12073	-0.437505	-0.350639	-0.0471295	0.175113	0.153345	0.109401	0.235496	0.223079	0.0615721
TCGA-YH-A8SY-01A	CAFclusterA	TCGA	Abnormal	Abnormal	Live	Female	>=65	NA	0.146458	-0.52106	-0.430057	-0.54421	-0.361605	-0.547737	-0.389753	-0.466602	-0.412838	-0.454649	-0.538094	-0.339036	-0.482138	-0.310202	-0.314115	-0.316476	-0.488846	-0.267181	-0.237223	-0.280933	-0.397224	0.0779135	-0.300209	-0.131359	-0.181673	-0.217393	-0.200984
TCGA-YY-A8LH-01A	CAFclusterA	TCGA	Normal	Abnormal	Live	Female	<65	II	0.0481522	-0.401628	-0.392202	-0.24813	-0.34323	-0.390685	-0.373106	-0.4121	-0.275768	-0.158528	-0.0215683	-0.216447	0.0651751	0.125395	-0.198939	-0.304435	-0.343405	-0.148164	-0.441732	-0.340693	-0.0656857	-0.349236	-0.306809	-0.0365508	-0.192204	-0.247756	-0.350196
DO224633	CAFclusterA	ICGC	Normal	Normal	Dead	Male	>=65	II	0.387539	-0.174952	-0.185489	-0.303837	-0.199639	-0.105117	-0.299954	-0.118608	-0.0687037	-0.209608	-0.374311	0.0874692	-0.291722	0.158821	0.210382	-0.0214643	-0.523022	-0.565287	-0.0920513	0.261655	0.0719143	-0.13338	-0.259588	0.0899753	0.08477	0.28125	0.0999713
DO224642	CAFclusterB	ICGC	Abnormal	Abnormal	Dead	Female	<65	II	0.324317	-0.0187552	0.16541	0.287448	0.410931	0.260249	0.137168	0.0914237	-0.0133422	0.307328	0.0188616	0.193871	0.11435	-0.0363284	0.195199	0.274024	-0.149831	-0.431653	-0.0237869	0.161654	0.217286	-0.489612	-0.214293	0.166912	0.261555	0.313432	0.151483
DO32829	CAFclusterA	ICGC	Abnormal	Abnormal	Dead	Female	>=65	II	0.14742	0.246748	0.38072	0.465594	0.281521	0.404874	0.496446	0.450311	0.476156	0.332781	0.352098	0.399361	0.580868	0.345831	-0.0305674	0.391918	0.531511	0.353225	0.2436	0.229151	0.398096	0.513355	-0.0465877	-0.23835	-0.145477	-0.0242166	-0.140513
DO32860	CAFclusterB	ICGC	Abnormal	Abnormal	Dead	Male	<65	II	-0.029358	-0.0630986	-0.246591	-0.349271	0.442906	-0.211964	-0.106175	-0.319253	-0.281268	0.334705	0.0398653	-0.282682	-0.114449	0.314786	0.121802	-0.420637	-0.0436168	-0.0732319	-0.259715	-0.323718	0.19263	-0.307687	0.0936402	0.0988484	0.378115	-0.0197806	0.068462
DO32863	CAFclusterA	ICGC	Abnormal	Abnormal	Dead	Male	<65	II	0.0466152	0.340981	0.323496	0.329112	0.51357	0.267743	0.337096	0.455765	0.345946	0.15537	0.0296472	0.192596	0.41677	0.31287	0.266004	0.154049	0.344939	-0.0016322	-0.023692	0.118949	0.063945	-0.0556044	0.0619146	-0.0959822	-0.110486	-0.132787	0.0641987
DO32875	CAFclusterB	ICGC	Normal	Abnormal	Dead	Male	>=65	II	-0.049146	-0.0128983	-0.194235	-0.157923	-0.0204513	-0.283017	-0.185062	-0.240406	-0.0314996	-0.123638	-0.130271	-0.0521298	-0.0738876	0.206446	-0.0484496	-0.414894	-0.0113279	0.122653	-0.13353	0.00969341	0.170525	0.354274	0.105113	-0.10678	-0.110619	-0.285491	-0.106392
DO32878	CAFclusterB	ICGC	Abnormal	Abnormal	Dead	Female	>=65	II	0.144423	0.146278	-0.151575	-0.132592	-0.31762	-0.348361	-0.306695	-0.185705	-0.13149	-0.081795	0.00308369	0.349544	-0.0298909	0.13325	0.0837457	-0.40339	0.51569	-0.0404851	-0.257592	0.00228775	0.276128	-0.0807298	-0.0915153	-0.303984	-0.121723	-0.239389	-0.0803246
DO32887	CAFclusterB	ICGC	Abnormal	Abnormal	Dead	Female	>=65	II	0.135253	0.570631	0.306071	0.329584	0.532214	0.0939245	0.230833	0.0800522	-0.0270933	0.444134	0.164402	0.272718	-0.0157747	-0.439653	0.0599506	0.153888	0.126896	-0.615514	0.204879	0.164961	-0.0216935	0.506788	-0.0623481	-0.107741	-0.0246007	-0.0907725	-0.126232
DO32900	CAFclusterB	ICGC	Abnormal	Abnormal	Dead	Male	<65	II	0.154676	0.0955021	0.0794276	0.383397	0.410072	0.33975	0.358047	0.473655	0.0791931	0.326478	0.479919	0.0845282	0.224602	-0.134034	0.13731	0.434807	-0.227045	0.0198082	-0.0325509	-0.165992	0.352766	0.0307801	0.0141219	0.0182842	-0.0126667	0.0466807	-0.0439076
DO33128	CAFclusterB	ICGC	Abnormal	Abnormal	Dead	Male	>=65	II	-0.127711	0.0348114	0.0304399	0.0771515	0.080777	-0.0375855	0.219512	0.33228	-0.00347192	0.191689	0.103632	-0.119833	0.117848	0.184234	0.097848	-0.0154757	0.132727	0.657475	-0.162281	-0.206781	0.735524	-0.00414039	-0.201685	-0.0379309	0.00426818	-0.0780875	0.0701829
DO33168	CAFclusterB	ICGC	Abnormal	Abnormal	Dead	Female	>=65	II	0.0113614	0.0133318	-0.0292188	-0.244591	0.109225	-0.246923	-0.0279559	-0.206671	-0.208257	-0.212619	-0.383395	-0.324008	-0.127837	0.0539027	0.183536	-0.371255	-0.183699	0.402926	-0.0864916	-0.0533397	0.0874587	0.0353498	0.0393664	0.141917	0.335089	0.0931687	0.0450798
DO33336	CAFclusterB	ICGC	Normal	Abnormal	Dead	Female	>=65	II	-0.145645	-0.135382	-0.209913	-0.163645	-0.473138	-0.0892671	-0.161771	-0.268249	-0.346938	-0.17479	-0.330373	-0.0838673	0.214749	-0.320647	-0.198485	-0.292861	0.122796	-0.531316	-0.03228	-0.202404	-0.242112	-0.328374	-0.282379	-0.0174087	-0.101064	-0.286842	-0.0945878
DO33344	CAFclusterB	ICGC	Abnormal	Abnormal	Dead	Male	>=65	II	-0.027624	-0.452806	-0.245605	-0.429365	0.422712	-0.473172	-0.0529303	-0.499799	-0.185607	-0.208055	0.306341	-0.602573	-0.546811	-0.0897129	-0.0834587	-0.220832	-0.451633	0.0111896	0.103651	-0.242207	0.229304	0.10435	0.249846	0.148967	0.00348908	-0.0306005	-0.0322311
DO33368	CAFclusterB	ICGC	Abnormal	Abnormal	Dead	Male	>=65	II	0.119479	-0.175282	0.111333	-0.0284805	-0.417922	0.0392379	0.151455	0.0425859	0.00125346	-0.238251	-0.250737	-0.0630572	0.12032	-0.0133934	-0.0159631	0.00124411	-0.220074	0.462242	-0.172074	-0.032162	0.247228	0.0206516	0.231266	-0.377277	-0.391397	-0.344322	-0.361923
DO33376	CAFclusterB	ICGC	Abnormal	Abnormal	Live	Female	<65	II	0.108392	-0.313902	0.380186	-0.0492912	0.0811786	-0.243645	-0.0948864	0.202691	-0.161456	-0.0461427	0.00115201	-0.131884	-0.316194	-0.219582	0.000106147	-0.0251376	0.0102156	0.379939	0.057899	-0.0531692	0.090474	-0.147105	-0.202336	-0.0391057	0.118048	0.197482	-0.0196936
DO33392	CAFclusterB	ICGC	Abnormal	Abnormal	Live	Male	>=65	II	-0.238495	0.31689	0.21684	0.230059	-0.119658	0.316149	0.132144	0.414416	-0.0705562	0.169455	0.219649	0.445983	0.446999	-0.138596	0.104068	0.271232	0.566856	-0.45612	0.0100072	-0.00892169	0.0134747	0.298937	-0.0579078	-0.214058	-0.287007	-0.197512	-0.218243
DO33400	CAFclusterA	ICGC	Abnormal	Abnormal	Live	Female	>=65	II	-0.223425	0.328683	0.44588	0.428383	0.155075	0.476024	0.197599	0.346656	0.226316	-0.0708271	0.206861	0.105815	0.181485	-0.257102	0.0501326	0.362539	0.35375	-0.148369	0.175095	0.285263	-0.146569	0.289288	-0.127599	-0.360266	-0.391637	-0.353452	-0.357594
DO33408	CAFclusterA	ICGC	Abnormal	Abnormal	Live	Female	>=65	II	0.245921	-0.132412	0.371862	0.329972	0.568125	-0.103424	0.319551	0.201158	0.191636	0.348862	0.170036	0.419195	0.223628	0.15974	0.263974	0.173924	0.49756	-0.454233	-0.168497	0.0359562	0.219252	-0.259649	0.266718	-0.0855472	0.143923	0.0567383	0.216075
DO33472	CAFclusterB	ICGC	Abnormal	Abnormal	Dead	Female	>=65	II	-0.158408	-0.21645	-0.00989172	-0.408029	-0.486999	-0.337015	-0.194026	-0.227406	-0.254675	-0.197495	-0.176813	0.153685	-0.353106	-0.597251	-0.00394996	-0.251814	0.21533	-0.171259	-0.197538	-0.00134957	0.329577	0.291283	-0.29226	-0.299046	-0.341752	-0.252976	-0.207317
DO33480	CAFclusterB	ICGC	Normal	Abnormal	Live	Male	<65	II	0.0256624	-0.0741473	0.155601	0.00589634	0.116698	-0.185693	0.0501388	0.080186	0.123344	0.188749	0.235154	0.31344	-0.110872	0.000381642	0.288406	0.00829689	0.265087	-0.406141	-0.295591	-0.260845	0.353622	-0.281774	-0.279169	0.0140293	0.0635502	0.207708	0.154244
DO33512	CAFclusterB	ICGC	Abnormal	Abnormal	Dead	NA	>=65	II	-0.179123	-0.0426167	-0.108788	0.105322	0.251302	0.0059517	0.0759088	0.0422662	0.0446104	0.22943	-0.0146561	-0.00623279	-0.273564	-0.238797	-0.127467	-0.0867007	0.0703359	-0.185858	-0.0241389	-0.206164	0.376057	0.269079	-0.291237	-0.207481	-0.212238	-0.185261	-0.217537
DO33544	CAFclusterA	ICGC	Abnormal	Abnormal	Dead	Female	>=65	II	0.0196059	0.0987737	0.329363	0.399792	0.0651891	0.344965	0.271591	0.445924	0.302741	0.461772	0.223141	0.486686	0.482248	-0.518266	0.160458	0.413278	0.479191	-0.450872	-0.0556292	-0.000426359	-0.14582	-0.0796511	-0.289422	-0.0635699	0.0924147	0.0274739	0.0312561
DO33552	CAFclusterB	ICGC	Abnormal	Abnormal	Live	Female	>=65	II	-0.0205801	0.467501	0.278353	0.363458	0.265587	0.0576614	0.310069	0.103058	0.290198	0.273058	-0.0795289	0.322457	0.302941	-0.241958	-0.0348598	0.450245	0.659859	-0.0957957	-0.0101294	0.321927	-0.102711	0.0641581	-0.181916	-0.207193	-0.254046	-0.161283	-0.0996988
DO33600	CAFclusterA	ICGC	Abnormal	Abnormal	Live	Female	>=65	II	0.100186	0.048607	0.297651	0.319312	0.423024	0.270366	0.158	0.0761419	-0.0973293	0.324792	-0.0951832	0.365722	0.368317	-0.356247	0.170255	0.28001	0.331393	-0.484868	-0.0121259	0.0625242	0.0294492	-0.137418	-0.313864	0.0226341	0.0277053	-0.0676538	-0.0312649
DO33984	CAFclusterA	ICGC	Abnormal	Abnormal	Live	Male	<65	II	-0.150595	0.183069	0.355543	0.259232	0.131646	0.0214771	0.177184	0.251014	0.299587	0.136532	0.226178	0.11034	0.0676776	0.0835602	0.135002	0.0826175	0.521306	0.0893215	-0.00600712	0.42149	0.49253	0.261689	0.0985347	0.13115	-0.058422	-0.0400211	0.00063373
DO34240	CAFclusterB	ICGC	Abnormal	Abnormal	Dead	Male	>=65	II	0.103153	0.368448	-0.0295564	-0.538923	0.151476	-0.482339	-0.150585	-0.469859	-0.356237	-0.158294	-0.306013	0.158601	0.235998	-0.0871699	0.000475799	-0.610339	0.401692	-0.0778799	-0.157998	0.0385736	0.241676	-0.118799	0.260911	-0.0326459	0.0386701	0.0116487	0.141139
DO34264	CAFclusterB	ICGC	Normal	Abnormal	Dead	Female	<65	II	-0.119386	-0.0731746	0.272144	0.294897	0.320059	-0.0839185	0.1647	0.427537	0.265222	0.130184	0.267017	0.285291	0.490696	0.215344	0.2525	0.162414	0.463362	-0.104919	-0.0941905	0.165867	0.150909	-0.096455	-0.0751494	-0.125407	-0.198247	-0.100485	-0.0661623
DO34288	CAFclusterB	ICGC	Abnormal	Abnormal	Dead	Female	>=65	II	-0.0625911	0.158792	0.0798764	-0.139475	0.589637	-0.0650457	0.0961419	-0.196612	0.0709382	0.275486	-0.0772212	0.289031	0.474874	-0.215088	-0.0477655	0.106593	0.467238	-0.135687	-0.203266	0.146119	-0.233236	0.199521	0.209555	-0.294636	-0.255883	-0.248234	-0.0925835
DO34312	CAFclusterB	ICGC	Abnormal	Abnormal	Dead	Female	<65	NA	0.160962	0.380364	0.188973	-0.309499	0.250434	-0.238919	0.130841	-0.252403	-0.177105	-0.0262914	-0.228186	-0.0797053	-0.252858	0.0750495	-0.111459	-0.351457	-0.141292	0.39456	0.037586	-0.0782371	0.465642	0.405598	0.161203	-0.0902462	0.0618077	0.0887047	-0.0198728
DO34336	CAFclusterB	ICGC	Abnormal	Abnormal	Live	Female	>=65	II	0.414896	0.0931553	-0.245696	-0.438113	0.511683	-0.195604	-0.0131489	-0.102167	-0.127137	-0.108207	0.320884	0.159196	-0.269506	-0.179171	0.474593	0.122266	-0.440249	-0.391573	-0.0958937	-0.0456144	0.140022	-0.412037	-0.275087	-0.127005	-0.161969	-0.101417	-0.268129
DO34368	CAFclusterB	ICGC	Abnormal	Abnormal	Dead	Female	<65	II	0.0197475	-0.0574646	-0.0635624	0.150658	0.0706554	0.160698	0.231741	-0.0149601	0.221821	0.370181	0.189571	0.119012	-0.0739285	-0.372533	0.0689294	0.312925	0.233532	-0.609223	0.0826283	0.130686	-0.280566	0.0438507	-0.098758	0.253253	0.411047	0.163422	0.238162
DO34432	CAFclusterB	ICGC	Abnormal	Normal	Dead	Female	>=65	II	-0.071486	0.199083	0.302209	0.182742	0.263086	0.249788	0.165433	0.162553	0.238922	0.148999	0.19173	0.211396	0.287078	-0.311824	0.202333	0.255665	0.0356986	-0.147917	-0.114612	-0.191752	0.465175	0.261977	-0.0231571	-0.119679	-0.0122827	-0.117024	0.0529551
DO34448	CAFclusterA	ICGC	Normal	Abnormal	Dead	Female	>=65	II	-0.00349597	-0.4092	0.0742247	-0.251451	-0.269225	-0.530677	-0.208836	-0.229186	-0.258465	-0.139877	-0.273491	-0.0928993	-0.37604	0.214488	0.119931	-0.452739	0.163399	0.169175	0.135891	-0.420016	-0.0559037	-0.166939	0.220239	0.0155413	0.17155	0.216464	0.146833
DO34504	CAFclusterB	ICGC	Abnormal	Normal	Dead	Male	<65	II	0.208579	-0.040989	-0.325275	-0.170335	0.336517	-0.25223	-0.0143313	-0.173106	-0.200116	0.172907	0.165191	-0.0765469	-0.0444672	-0.175944	0.0498671	-0.452505	-0.164068	0.244878	-0.345658	-0.198039	0.245567	0.0844241	0.180921	-0.0762838	-0.120682	-0.053602	0.0654656
DO34600	CAFclusterB	ICGC	Abnormal	Abnormal	Dead	Male	>=65	II	0.21601	-0.395865	-0.0739168	-0.226451	-0.199603	-0.315359	-0.0948903	-0.325655	-0.185536	-0.225379	-0.370932	-0.0964049	-0.37053	0.0596068	0.116357	-0.236072	0.132572	0.197243	-0.146169	-0.411001	0.371382	-0.343983	0.0386889	-0.0570345	0.0630581	-0.12895	-0.150539
DO34608	CAFclusterB	ICGC	Abnormal	Abnormal	Dead	Female	>=65	II	-0.0882627	0.0759555	-0.0297216	0.0257187	0.197738	0.0371645	0.0639485	-0.0181452	-0.14244	-0.0117844	-0.0139259	-0.205363	0.157553	-0.283165	0.19131	-0.180362	-0.271396	-0.424844	-0.210564	-0.139805	0.0419922	0.392001	-0.0516076	-0.302338	-0.314174	-0.144429	-0.192394
DO34616	CAFclusterB	ICGC	Abnormal	Abnormal	Live	Female	>=65	II	0.0309964	-0.0838468	0.242591	0.295494	0.283623	0.117034	0.0335406	0.0575331	0.112113	0.2441	0.423743	-0.109207	0.192122	-0.134649	0.0907086	0.350845	0.221546	0.161947	-0.0257799	0.0929561	0.00667879	0.19222	-0.197023	-0.246574	-0.349729	-0.263836	-0.330182
DO34640	CAFclusterB	ICGC	Abnormal	Abnormal	Dead	Female	<65	II	0.0642018	0.184671	-0.154386	-0.500643	-0.395489	-0.5131	-0.217543	-0.487458	-0.309231	-0.163953	-0.285512	0.273735	0.0350256	-0.262363	-0.0488151	-0.503985	0.586662	-0.272449	-0.325583	-0.0190342	0.53817	0.0415736	0.144784	0.0338601	-0.0329101	-0.162236	0.0240733
DO34656	CAFclusterA	ICGC	Abnormal	Abnormal	Live	Female	<65	II	0.0851277	-0.274745	0.354915	0.325241	0.164446	0.295683	-0.00738134	0.313886	0.22956	0.254609	0.188412	0.144609	-0.213317	0.0810613	0.238536	0.0388271	0.15958	0.125195	-0.117568	-0.0157762	-0.255284	-0.121972	0.0227529	-0.268846	-0.187712	-0.053343	0.0327452
DO34680	CAFclusterB	ICGC	Normal	Abnormal	Dead	Male	>=65	II	-0.170907	-0.0530981	0.351853	0.134632	-0.0681499	-0.0805755	0.0293781	0.136786	0.196695	0.158885	0.249041	-0.271043	-0.203735	0.196977	-0.0322133	0.266309	0.122043	0.404866	-0.0887153	0.119795	0.0685561	0.365621	0.154005	-0.18742	-0.170479	-0.166104	-0.207844
DO34696	CAFclusterA	ICGC	Abnormal	Abnormal	Live	Male	>=65	II	0.0102582	0.0192936	0.0926917	0.384519	-0.323311	0.481735	0.302162	0.289681	0.123562	0.0639561	0.141672	-0.073485	0.416962	0.340836	0.0374885	0.356963	-0.16279	0.374683	-0.243719	0.139492	-0.0933146	0.449555	-0.0452301	-0.286447	-0.193045	-0.208135	-0.132506
DO34720	CAFclusterB	ICGC	Abnormal	Abnormal	Live	Male	>=65	II	-0.290035	0.0157624	0.0292793	-0.0758926	-0.34125	0.22039	-0.113455	0.0319688	-0.120238	-0.115419	0.012507	-0.29322	-0.0895549	-0.402872	-0.0528359	-0.125203	-0.365007	0.203956	-0.21615	-0.284754	0.413744	0.258934	-0.253157	0.133348	-0.0324854	-0.219137	0.0809041
DO34728	CAFclusterA	ICGC	Abnormal	Abnormal	Live	Female	>=65	II	0.322269	-0.0953873	0.243826	0.0160609	0.0262981	-0.0535838	0.183722	-0.111292	0.0713862	-0.0889084	-0.233403	0.085732	-0.303009	0.266432	-0.0107911	-0.343946	0.387587	0.107345	-0.0482258	-0.00335066	0.0499856	-0.0450116	0.0901147	-0.0429556	-0.00689032	-0.174663	0.0428941
DO34736	CAFclusterB	ICGC	Abnormal	Abnormal	Dead	Female	>=65	II	-0.139151	0.0268099	-0.267206	0.132398	0.274988	0.0296253	0.284505	-0.132128	0.19258	-0.0022569	0.140042	0.15658	0.32826	0.43735	-0.1047	0.194259	0.194209	0.661351	-0.102733	0.151302	-0.462993	0.228035	0.521944	0.057876	-0.145664	-0.184166	-0.322258
DO34785	CAFclusterA	ICGC	Abnormal	Abnormal	Live	Female	>=65	II	-0.224474	-0.231136	0.198205	0.176686	0.233738	0.143991	0.171593	0.218225	0.0942229	-0.0979459	0.240291	0.0179346	0.332741	0.234987	0.0175675	0.288641	0.095167	-0.150912	-0.150214	0.103618	-0.146497	0.219484	0.0484036	-0.135061	-0.18785	-0.138908	-0.0883228
DO34793	CAFclusterA	ICGC	Abnormal	Abnormal	Dead	Male	<65	II	0.239358	-0.235043	-0.0711778	0.18545	0.0570823	-0.0548194	-0.0374082	-0.114947	-0.374582	0.320426	0.117489	-0.290577	-0.094455	0.25748	0.0785523	-0.101118	-0.479462	0.300117	-0.322558	-0.303769	-0.206823	0.245463	-0.0133202	0.149538	0.183547	0.0639271	0.179607
DO34801	CAFclusterA	ICGC	Normal	Abnormal	Live	Male	<65	II	-0.258624	-0.0101751	0.537026	0.464093	0.279579	0.536795	0.402609	0.488652	0.400389	0.28705	0.390627	0.331927	0.41078	0.153364	0.198125	0.625883	0.377402	-0.322877	0.274114	-0.0638226	-0.164774	-0.194914	-0.329666	-0.106843	-0.326072	-0.0482671	-0.0948091
DO34809	CAFclusterB	ICGC	Abnormal	Abnormal	Dead	Female	>=65	II	-0.118627	-0.0877908	-0.1596	0.310505	0.324768	0.246686	0.215419	0.0845204	0.335347	-0.0150143	0.203075	-0.12425	0.26586	0.492792	-0.18067	0.322975	-0.248398	0.609248	0.0408597	0.160724	-0.400492	0.211594	0.425296	0.0217729	-0.331922	-0.106089	-0.312835
DO34817	CAFclusterA	ICGC	Normal	Abnormal	Live	Female	>=65	II	-0.209871	0.138775	-0.00785677	0.451994	0.152906	0.373668	0.285078	0.28789	0.171325	0.141835	-0.039116	-0.204784	-0.0410958	0.29323	-0.0168294	0.302776	0.327754	0.148927	0.238946	0.0585089	0.039846	0.265013	-0.139874	0.139348	0.0528223	0.136538	0.0861102
DO34849	CAFclusterB	ICGC	Abnormal	Abnormal	Dead	Female	>=65	II	0.173115	-0.33707	-0.29841	0.186984	-0.0823812	-0.0466074	-0.217349	-0.211033	0.0609612	0.458041	0.0964604	-0.0853205	-0.182058	-0.11945	-0.079991	-0.228706	-0.129506	0.182874	-0.0951399	0.161082	-0.0379562	0.297059	-0.154756	-0.0615338	-0.108908	-0.0169749	0.127174
DO49421	CAFclusterA	ICGC	Abnormal	Abnormal	Dead	Female	>=65	II	0.236989	0.295072	-0.0953443	0.236356	0.368368	0.473133	0.20372	-0.0194473	-0.124537	-0.00601915	0.291012	0.39733	0.205605	0.103963	0.138345	0.314537	-0.284226	-0.17157	0.0923286	0.330625	-0.373557	-0.252364	-0.0180508	0.0315642	0.0495007	0.13168	-0.0307573
DO49433	CAFclusterB	ICGC	Normal	Abnormal	Dead	Male	<65	II	0.306169	-0.160812	-0.0824629	0.315945	-0.023425	0.368955	0.0260199	-0.0810883	-0.171231	-0.172793	-0.307961	0.012648	-0.382724	-0.219877	0.00565081	0.161401	-0.142712	-0.360411	0.136563	0.429434	-0.312876	-0.203669	-0.323759	-0.0514328	0.118186	0.0660929	-0.138089
DO49478	CAFclusterA	ICGC	Abnormal	Abnormal	Live	Male	>=65	I	0.376443	-0.0881479	-0.222285	-0.0653698	-0.279489	0.224251	-0.10581	-0.185738	0.06923	-0.316176	-0.155068	0.351463	0.183629	-0.0353788	0.074899	0.159067	-0.178662	-0.367699	0.0729974	0.106832	-0.143498	-0.199179	-0.13018	-0.17263	-0.238377	-0.292606	-0.20388
DO51468	CAFclusterB	ICGC	Normal	Abnormal	Dead	Male	>=65	III	0.235824	-0.0414044	-0.21277	0.0951044	-0.140032	0.203451	-0.0117067	-0.163225	-0.115652	-0.014212	0.0755451	0.142979	-0.163224	-0.014645	0.148374	-0.0425108	-0.286015	-0.292716	0.110199	0.292686	-0.0407047	-0.288103	0.0664987	0.109961	0.0370792	0.0821194	-0.0936136
DO51482	CAFclusterA	ICGC	Abnormal	Abnormal	Dead	Male	>=65	I	0.158297	0.263544	0.176515	0.239936	4.64e-05	0.534693	0.268547	0.205758	0.149474	0.0538308	0.210811	0.322256	0.121729	-0.105425	0.0218757	0.36944	0.0276058	-0.213772	0.0618187	0.42015	0.0759638	0.149898	-0.0724049	-0.0711859	-0.037401	-0.0615525	0.142274
DO51483	CAFclusterA	ICGC	Abnormal	Abnormal	Dead	Female	>=65	II	0.244026	-0.0370384	0.0332699	0.0351935	0.282114	0.25767	0.242324	0.00429046	0.360453	-0.0468924	0.158762	0.133101	-0.367993	0.149587	0.0808138	0.158528	0.000586808	0.0196707	0.100513	0.305997	-0.0900231	0.0252136	-0.0824363	0.0185286	0.107594	0.207097	0.107551
DO51493	CAFclusterB	ICGC	Abnormal	Abnormal	Dead	Female	<65	II	0.140034	0.386238	0.283947	0.0548174	-0.0310992	0.465138	0.288717	0.333723	0.343464	-0.186687	0.205136	0.281784	0.314888	0.19205	0.0754887	0.326077	0.259501	-0.402031	0.279695	0.382718	-0.0834927	0.306572	0.102917	0.237746	0.358358	0.20767	0.206675
DO51494	CAFclusterA	ICGC	Abnormal	Abnormal	Dead	Male	<65	II	0.247169	0.0956299	0.250305	0.318911	0.082008	0.413244	0.331169	0.3431	0.472462	0.274306	-0.153907	0.184565	-0.124748	0.21568	0.114459	0.304058	0.0230712	0.13701	0.351546	0.41088	0.0999779	0.0460937	-0.257878	-0.00569145	0.0089113	0.0494147	0.0798489
DO51509	CAFclusterA	ICGC	Abnormal	Abnormal	Dead	Male	>=65	II	0.116311	0.432744	0.116706	0.371059	0.325172	0.483607	0.331688	0.279826	0.418694	0.00440323	0.126737	0.289221	0.206143	-0.0810599	0.0714927	0.49714	-0.0215109	-0.234033	0.296271	0.390956	-0.157357	0.150374	-0.2025	-0.180166	-0.00417815	0.152711	-0.0809849
DO51526	CAFclusterB	ICGC	Normal	Abnormal	Dead	Female	>=65	II	0.314406	0.345109	0.261844	0.381429	0.0235969	0.57942	0.235128	0.166549	0.302431	0.0735628	0.0508475	0.116025	-0.133233	-0.123057	0.0669859	0.578242	-0.0306791	-0.442108	0.237513	0.413706	0.133044	0.718865	-0.104133	0.255058	0.269871	0.259332	0.20543
DO51534	CAFclusterA	ICGC	Normal	Abnormal	Dead	Female	>=65	II	0.383872	-0.131961	0.120192	0.182163	0.0125206	0.236496	0.0927014	0.0498038	0.137395	-0.112528	0.20275	0.322567	-0.314952	0.0143934	0.221626	0.267605	0.33031	-0.507067	0.0338913	0.453228	0.042233	-0.233852	-0.194401	-0.26192	-0.263511	-0.301408	-0.283521
DO51535	CAFclusterB	ICGC	Abnormal	Abnormal	Dead	Male	>=65	II	0.405933	0.112854	-0.015384	0.0624658	-0.0487351	0.113809	0.127076	-0.1251	0.0508675	-0.177289	0.448399	0.0346613	-0.214748	-0.0905019	0.234395	0.0259009	-0.23215	-0.268124	-0.056792	0.350785	0.125548	-0.327906	-0.13511	0.218553	0.415881	0.298983	0.117034

## Sheet: Table S5
id	CAF cluster	StromalScore	ImmuneScore	ESTIMATEScore	aDCs	APC-co-inhibition	APC-co-stimulation	B-cells	CCR	CD8+-T-cells	Check-point	Cytolytic-activity	DCs	HLA	iDCs	Inflammation-promoting	Macrophages	Mast-cells	MHC-class-I	Neutrophils	NK-cells	Parainflammation	pDCs	T-cell-co-inhibition	T-cell-co-stimulation	T-helper-cells	Tfh	Th1-cells	Th2-cells	TIL	Treg	Type-I-IFN-Reponse	Type-II-IFN-Reponse	MDSC cells	TGF-b-associated-ECM	Anti-PD-1-resistant	Nivolumab-responsive
TCGA-2J-AAB1-01A	CAFclusterA	517.732	1230.89	1748.62	0.600879	0.779162	0.665262	0.639035	0.663705	0.785144	0.679127	0.8272	0.79617	0.927509	0.677149	0.758188	0.784731	0.682722	0.992889	0.727544	0.519242	0.886678	0.675334	0.663278	0.678974	0.933532	0.623043	0.617337	0.611266	0.751398	0.8073	0.833041	0.801789	0.821282	0.849728	0.772914	0.622254
TCGA-2J-AAB4-01A	CAFclusterA	344.543	1268.54	1613.08	0.618899	0.776389	0.738005	0.553208	0.670773	0.778141	0.69442	0.774315	0.736785	0.943101	0.714604	0.726963	0.785666	0.632315	0.993173	0.706978	0.53113	0.898377	0.66119	0.638344	0.658272	0.941288	0.549917	0.602136	0.521607	0.726048	0.809199	0.860515	0.756337	0.821562	0.829498	0.777434	0.643947
TCGA-2J-AAB6-01A	CAFclusterA	788.874	760.136	1549.01	0.644083	0.823021	0.674015	0.582802	0.64706	0.64456	0.661787	0.6795	0.768229	0.900824	0.57053	0.653613	0.804911	0.547725	0.989512	0.719017	0.515098	0.879518	0.598566	0.631633	0.623127	0.925752	0.540652	0.561986	0.542473	0.681381	0.80236	0.873328	0.689619	0.805854	0.90872	0.811608	0.611923
TCGA-2J-AAB8-01A	CAFclusterA	1072.29	841.643	1913.94	0.609664	0.758357	0.712301	0.650089	0.650513	0.719326	0.664624	0.761547	0.785787	0.886918	0.637878	0.692634	0.785997	0.592498	0.99409	0.708046	0.471376	0.872639	0.606511	0.613427	0.640534	0.856044	0.600747	0.568371	0.570495	0.716733	0.809222	0.867728	0.731506	0.816923	0.918923	0.801048	0.616579
TCGA-2J-AAB9-01A	CAFclusterA	917.226	1159.99	2077.21	0.577163	0.754628	0.677445	0.624093	0.654323	0.78704	0.669071	0.781955	0.741722	0.924739	0.656409	0.708652	0.794849	0.704195	0.984304	0.737216	0.46409	0.852975	0.683646	0.639226	0.664767	0.929618	0.598638	0.592971	0.610859	0.741907	0.808806	0.767015	0.804468	0.82852	0.875705	0.799022	0.629135
TCGA-2J-AABA-01A	CAFclusterA	837.679	793.911	1631.59	0.58547	0.735045	0.676868	0.678694	0.646899	0.762824	0.656439	0.760727	0.733468	0.897955	0.635765	0.66326	0.763684	0.735821	0.987739	0.703662	0.487348	0.84543	0.627507	0.597932	0.638484	0.830806	0.611442	0.540842	0.520635	0.733245	0.795964	0.74003	0.782685	0.817443	0.862361	0.790517	0.622107
TCGA-2J-AABE-01A	CAFclusterA	845.124	1080.5	1925.62	0.592653	0.762427	0.714925	0.62971	0.650346	0.620587	0.659207	0.696171	0.794685	0.904176	0.721364	0.623117	0.82344	0.652083	0.983515	0.752849	0.502705	0.874569	0.60705	0.606196	0.628411	0.946978	0.519859	0.528951	0.574481	0.711107	0.800351	0.796161	0.741105	0.827561	0.908013	0.803012	0.607068
TCGA-2J-AABF-01A	CAFclusterA	995.636	1874.52	2870.15	0.723506	0.792348	0.698475	0.637176	0.676879	0.790858	0.699521	0.790126	0.798261	0.933275	0.663024	0.743178	0.808221	0.635306	0.993798	0.781428	0.541365	0.895761	0.727216	0.676233	0.694295	0.96125	0.582241	0.593064	0.543235	0.773598	0.815214	0.884505	0.803026	0.843397	0.846041	0.772686	0.644918
TCGA-2J-AABH-01A	CAFclusterA	260.789	782.388	1043.18	0.602888	0.72664	0.643484	0.584355	0.643546	0.652414	0.630003	0.743305	0.648015	0.90746	0.639293	0.634412	0.798156	0.566222	0.987449	0.726914	0.429751	0.847215	0.634672	0.58988	0.589329	0.903942	0.450423	0.537944	0.561866	0.689553	0.791781	0.789237	0.74576	0.815271	0.851545	0.759809	0.645293
TCGA-2J-AABI-01A	CAFclusterA	308.623	1325.07	1633.69	0.674696	0.73283	0.694916	0.74439	0.651993	0.644828	0.675866	0.831848	0.802249	0.916229	0.541629	0.717668	0.798606	0.465552	0.98506	0.714859	0.495725	0.829842	0.701872	0.645653	0.688898	0.897499	0.731438	0.613661	0.55249	0.747691	0.800102	0.772002	0.693655	0.83458	0.872029	0.763372	0.587384
TCGA-2J-AABK-01A	CAFclusterB	-535.089	567.94	32.8511	0.580583	0.732258	0.629723	0.597048	0.636333	0.744394	0.632763	0.742667	0.674546	0.912615	0.567897	0.699997	0.764738	0.647122	0.988478	0.691911	0.422454	0.867591	0.623218	0.581415	0.603706	0.820302	0.531549	0.536692	0.603133	0.693958	0.78812	0.830712	0.78076	0.808267	0.758979	0.729954	0.67231
TCGA-2J-AABO-01A	CAFclusterA	656.648	631.917	1288.57	0.534984	0.720141	0.694878	0.657464	0.638557	0.743008	0.659611	0.823488	0.771176	0.875655	0.661583	0.670782	0.754808	0.752833	0.981128	0.692457	0.424307	0.858483	0.668739	0.597307	0.635883	0.880625	0.557137	0.559465	0.538763	0.717443	0.79249	0.808698	0.773211	0.81859	0.898765	0.806157	0.621082
TCGA-2J-AABP-01A	CAFclusterA	1664.12	2167.22	3831.34	0.563621	0.862975	0.703595	0.671865	0.665732	0.861903	0.720283	0.930672	0.793936	0.94464	0.522379	0.82064	0.847397	0.502272	0.991487	0.736715	0.560308	0.849931	0.718971	0.762443	0.723946	0.980628	0.709014	0.663812	0.614685	0.805444	0.822656	0.77446	0.756887	0.83928	0.876672	0.819223	0.51349
TCGA-2J-AABR-01A	CAFclusterB	1021.72	1954.54	2976.25	0.62941	0.759542	0.716718	0.678479	0.680695	0.891372	0.718578	0.878597	0.806835	0.933034	0.717621	0.777564	0.798264	0.718569	0.989848	0.784027	0.587362	0.875966	0.710077	0.685021	0.733371	0.961858	0.663218	0.629119	0.616212	0.806215	0.821525	0.796186	0.821077	0.849231	0.865637	0.788324	0.628088
TCGA-2J-AABT-01A	CAFclusterA	1228.83	1588.27	2817.1	0.566506	0.745895	0.688515	0.635419	0.664564	0.760733	0.685717	0.760387	0.846027	0.919387	0.643936	0.703024	0.835554	0.651417	0.987113	0.751937	0.498099	0.861142	0.716872	0.684251	0.692724	0.954564	0.594871	0.583875	0.598951	0.767192	0.804822	0.772945	0.815281	0.829293	0.832739	0.792308	0.619297
TCGA-2J-AABU-01A	CAFclusterA	625.939	855.399	1481.34	0.535344	0.784502	0.684075	0.687786	0.646143	0.771504	0.67309	0.8168	0.741015	0.909492	0.753931	0.727566	0.77617	0.66307	0.985979	0.68685	0.636683	0.844255	0.628019	0.648388	0.655259	0.864383	0.626842	0.567053	0.568547	0.730228	0.801131	0.777674	0.699106	0.816877	0.925562	0.797185	0.602228
TCGA-2J-AABV-01A	CAFclusterB	-76.2065	821.383	745.176	0.614646	0.700312	0.615657	0.577593	0.626927	0.780524	0.615138	0.820769	0.693991	0.899022	0.621633	0.649386	0.750248	0.75136	0.972862	0.677878	0.567077	0.834293	0.642931	0.589742	0.595385	0.864164	0.381713	0.567549	0.48122	0.697727	0.76549	0.760507	0.722754	0.804091	0.754629	0.754964	0.634632
TCGA-2L-AAQE-01A	CAFclusterA	163.889	734.876	898.765	0.680755	0.738585	0.6615	0.738462	0.65468	0.76934	0.657806	0.799368	0.765672	0.879482	0.651729	0.717269	0.766565	0.717827	0.986174	0.690494	0.526713	0.878917	0.617452	0.628292	0.681212	0.836519	0.728983	0.595911	0.631514	0.751329	0.802342	0.874896	0.778101	0.825979	0.858886	0.774403	0.59984
TCGA-2L-AAQI-01A	CAFclusterA	195.381	535.477	730.858	0.607192	0.73651	0.656052	0.59189	0.627568	0.712567	0.623323	0.75114	0.500474	0.898343	0.46411	0.637951	0.785182	0.472103	0.988414	0.708005	0.508083	0.863864	0.603489	0.554316	0.579455	0.892977	0.458431	0.482838	0.529345	0.683871	0.794414	0.823844	0.782695	0.815496	0.823121	0.772288	0.630919
TCGA-2L-AAQJ-01A	CAFclusterA	386.947	1104.36	1491.3	0.705927	0.74644	0.719648	0.746825	0.670076	0.731142	0.688282	0.774519	0.71081	0.908927	0.648992	0.733467	0.794084	0.604072	0.988091	0.73806	0.512123	0.869575	0.681161	0.636633	0.683284	0.89018	0.730577	0.591523	0.58968	0.756449	0.806224	0.801755	0.781987	0.832421	0.853022	0.766877	0.606168
TCGA-2L-AAQL-01A	CAFclusterB	673.225	1276.71	1949.93	0.584444	0.725971	0.66749	0.613431	0.647671	0.739239	0.666529	0.854694	0.678279	0.918979	0.649894	0.707911	0.815708	0.63598	0.979971	0.714157	0.594953	0.851007	0.724372	0.614291	0.642154	0.912379	0.369117	0.545795	0.588409	0.723021	0.78197	0.793833	0.773041	0.816626	0.857224	0.783735	0.624424
TCGA-3A-A9I5-01A	CAFclusterB	123.838	538.364	662.202	0.520364	0.704098	0.652044	0.683476	0.626811	0.644463	0.628663	0.680876	0.651764	0.879845	0.562604	0.657583	0.785643	0.659662	0.977692	0.706411	0.402788	0.815141	0.579001	0.585116	0.656483	0.819159	0.716393	0.508927	0.528884	0.699111	0.777005	0.777146	0.712157	0.806359	0.85449	0.761071	0.637252
TCGA-3A-A9I7-01A	CAFclusterA	881.913	1354.02	2235.93	0.592242	0.751576	0.720687	0.757422	0.66491	0.792778	0.701294	0.837816	0.764363	0.921936	0.670918	0.752385	0.78186	0.714402	0.987892	0.730704	0.550679	0.878364	0.685239	0.670718	0.695592	0.903334	0.73915	0.590756	0.545186	0.778063	0.802296	0.83668	0.767806	0.839931	0.919787	0.801072	0.625985
TCGA-3A-A9I9-01A	CAFclusterA	481.213	1144.46	1625.67	0.650213	0.736834	0.69715	0.557167	0.645322	0.747798	0.667846	0.759775	0.706589	0.900201	0.635491	0.672806	0.816668	0.662049	0.98734	0.729648	0.588486	0.846383	0.649614	0.610624	0.633276	0.916658	0.494158	0.570984	0.538415	0.71583	0.78881	0.777591	0.764921	0.822537	0.832771	0.775408	0.630343
TCGA-3A-A9IB-01A	CAFclusterA	1177.82	1098.25	2276.07	0.683604	0.79803	0.682807	0.556987	0.650927	0.667707	0.67198	0.805654	0.758604	0.907539	0.602087	0.66019	0.840728	0.718109	0.991102	0.713963	0.537493	0.88009	0.63788	0.642006	0.646196	0.926433	0.566691	0.567869	0.591772	0.714961	0.80653	0.82408	0.79332	0.826347	0.899604	0.805411	0.5833
TCGA-3A-A9IC-01A	CAFclusterA	1139.73	931.344	2071.08	0.578827	0.776102	0.699548	0.56352	0.653536	0.686502	0.669701	0.760759	0.722846	0.932817	0.656623	0.679241	0.801475	0.677837	0.987503	0.733547	0.519151	0.836113	0.620342	0.601272	0.63743	0.877027	0.521468	0.546463	0.587159	0.70625	0.795546	0.808776	0.738809	0.812703	0.940075	0.826996	0.604803
TCGA-3A-A9IH-01A	CAFclusterA	202.465	583.199	785.664	0.582409	0.771322	0.669947	0.625112	0.640292	0.655283	0.645708	0.715311	0.755481	0.916998	0.700315	0.666299	0.787386	0.556322	0.992061	0.709454	0.400657	0.871644	0.658862	0.599489	0.609795	0.862195	0.56632	0.519326	0.564302	0.692044	0.795398	0.845941	0.800829	0.816082	0.860544	0.779195	0.63544
TCGA-3A-A9IJ-01A	CAFclusterB	-868.63	-906.426	-1775.06	0.429095	0.645522	0.516596	0.518824	0.513188	0.681542	0.518851	0.578491	0.409455	0.798911	0.29157	0.551107	0.670662	0.630686	0.939661	0.605191	0.412339	0.721975	0.506069	0.49792	0.443171	0.777169	0.383387	0.347174	0.310997	0.572295	0.725727	0.730974	0.67726	0.750539	0.51378	0.700641	0.621026
TCGA-3A-A9IL-01A	CAFclusterB	-34.0819	-59.0697	-93.1517	0.548735	0.646257	0.511309	0.516412	0.569194	0.646603	0.567839	0.670145	0.622805	0.870322	0.605548	0.563985	0.659099	0.660918	0.950033	0.667564	0.428174	0.748914	0.575991	0.533748	0.538261	0.889597	0.380695	0.479152	0.409406	0.647191	0.767927	0.696971	0.74025	0.777714	0.656657	0.716399	0.612331
TCGA-3A-A9IN-01A	CAFclusterB	450.702	71.5025	522.205	0.59823	0.676287	0.5623	0.577689	0.598096	0.692605	0.593444	0.748579	0.601867	0.874198	0.555437	0.624619	0.729218	0.64706	0.96606	0.668301	0.518946	0.770022	0.566669	0.604041	0.562526	0.878412	0.470469	0.516984	0.38869	0.67305	0.767891	0.708503	0.757993	0.795308	0.692605	0.761248	0.626582
TCGA-3A-A9IO-01A	CAFclusterB	-1007.62	-691.609	-1699.23	0.485229	0.628963	0.510345	0.587652	0.540058	0.637436	0.551484	0.746318	0.727186	0.829857	0.581785	0.543683	0.676952	0.62168	0.941791	0.665001	0.468179	0.708285	0.533088	0.510285	0.528122	0.800705	0.411416	0.478557	0.47533	0.634139	0.754945	0.683144	0.763441	0.754928	0.615635	0.67727	0.615018
TCGA-3A-A9IR-01A	CAFclusterB	-1226.69	-679.232	-1905.92	0.49442	0.597358	0.542181	0.492327	0.51268	0.632914	0.54154	0.701411	0.589433	0.818801	0.419156	0.625018	0.636638	0.645777	0.933111	0.705183	0.445674	0.69775	0.538358	0.517687	0.547135	0.783102	0.398767	0.389138	0.41864	0.638828	0.742589	0.679882	0.667951	0.743655	0.44808	0.638011	0.596545
TCGA-3A-A9IS-01A	CAFclusterB	-1598.56	-1190.12	-2788.69	0.520599	0.588901	0.457346	0.53492	0.501084	0.59406	0.49833	0.664197	0.572927	0.78426	0.380675	0.528193	0.627036	0.369106	0.913436	0.655542	0.436837	0.665588	0.488763	0.476221	0.456473	0.728249	0	0.372073	0.430531	0.577784	0.740745	0.674692	0.690264	0.709338	0.519264	0.652802	0.587669
TCGA-3A-A9IU-01A	CAFclusterA	432.031	539.903	971.934	0.67925	0.756102	0.629486	0.658417	0.63342	0.670965	0.616462	0.714867	0.628948	0.884572	0.541708	0.680863	0.796717	0.632869	0.987938	0.711083	0.465538	0.868348	0.609895	0.559397	0.58749	0.829687	0.622284	0.492629	0.521457	0.692132	0.786193	0.849553	0.743735	0.816995	0.893428	0.786829	0.602675
TCGA-3A-A9IV-01A	CAFclusterB	120.542	-651.087	-530.545	0.438791	0.644146	0.523134	0.542821	0.53749	0.509545	0.550525	0.708702	0.455243	0.856028	0.325709	0.529461	0.737391	0.454699	0.947679	0.712417	0.457786	0.72855	0.536049	0.556271	0.455743	0.81505	0.259969	0.37823	0.413375	0.601906	0.750195	0.658141	0.647755	0.765679	0.846193	0.73105	0.6283
TCGA-3A-A9IX-01A	CAFclusterA	1311.4	2042.92	3354.31	0.660496	0.783113	0.705369	0.769088	0.68223	0.864237	0.71315	0.863506	0.854237	0.932887	0.789308	0.745707	0.813929	0.831991	0.983834	0.7789	0.6336	0.873499	0.679503	0.688615	0.72025	0.963098	0.742409	0.613406	0.658849	0.817293	0.827771	0.792334	0.821211	0.854985	0.851889	0.795265	0.617945
TCGA-3A-A9IZ-01A	CAFclusterA	-6.9127	405.188	398.275	0.598606	0.72022	0.66935	0.553985	0.629537	0.595251	0.627209	0.734421	0.538782	0.857763	0.377178	0.669173	0.757072	0.495133	0.990224	0.72244	0.522713	0.856655	0.601996	0.551146	0.591641	0.833966	0.511461	0.519624	0.590941	0.633301	0.79651	0.774799	0.717323	0.786457	0.884526	0.789438	0.624548
TCGA-3A-A9J0-01A	CAFclusterA	765.669	812.123	1577.79	0.564719	0.735439	0.687461	0.635259	0.649775	0.676752	0.659911	0.80755	0.669826	0.897275	0.475132	0.667319	0.823199	0.67624	0.990718	0.715121	0.507652	0.85524	0.593895	0.603703	0.625085	0.867982	0.543742	0.524566	0.525127	0.71098	0.790491	0.747724	0.741403	0.811106	0.906145	0.787429	0.610189
TCGA-3E-AAAY-01A	CAFclusterA	1165.7	1849.23	3014.93	0.615415	0.775365	0.694611	0.6552	0.668655	0.806078	0.694306	0.837691	0.718988	0.91211	0.626427	0.745831	0.807056	0.703036	0.991056	0.770844	0.554548	0.882332	0.702234	0.671583	0.693669	0.94017	0.583713	0.590641	0.593771	0.769371	0.809923	0.858677	0.835521	0.842475	0.846264	0.779588	0.622134
TCGA-3E-AAAZ-01A	CAFclusterA	607.206	372.977	980.182	0.527273	0.695854	0.635672	0.618817	0.633102	0.691024	0.612122	0.709465	0.710636	0.861632	0.635578	0.622985	0.777253	0.701099	0.976316	0.696043	0.44539	0.829738	0.59769	0.572034	0.59359	0.818405	0.543507	0.491538	0.542563	0.695446	0.781932	0.747126	0.808776	0.802938	0.864628	0.800175	0.603386
TCGA-F2-6879-01A	CAFclusterA	690.226	669.286	1359.51	0.587903	0.769599	0.709129	0.513351	0.631998	0.692289	0.638971	0.766305	0.716503	0.885879	0.671624	0.659686	0.778528	0.720696	0.990502	0.733229	0.407687	0.892104	0.574027	0.572571	0.602629	0.886776	0.494522	0.520521	0.530938	0.686331	0.807836	0.851635	0.717317	0.805332	0.899234	0.777014	0.597455
TCGA-F2-6880-01A	CAFclusterB	-608.736	-232.269	-841.005	0.557346	0.679196	0.550987	0.53845	0.566005	0.708725	0.555475	0.716422	0.513269	0.847788	0.344157	0.592082	0.722915	0.732752	0.958745	0.661664	0.518539	0.77756	0.578296	0.511775	0.496812	0.812181	0.304107	0.424543	0.411965	0.63557	0.749287	0.739996	0.741314	0.779443	0.601523	0.706049	0.622003
TCGA-F2-A44G-01A	CAFclusterA	663.763	937.933	1601.7	0.641753	0.766444	0.708132	0.567686	0.652786	0.647551	0.665164	0.717063	0.783411	0.903257	0.68446	0.660773	0.809659	0.588464	0.991354	0.739438	0.464898	0.867345	0.625255	0.589474	0.629275	0.875835	0.45156	0.498535	0.603125	0.689373	0.797458	0.800702	0.735642	0.810168	0.9121	0.784889	0.617156
TCGA-F2-A44H-01A	CAFclusterA	1517.46	1523.07	3040.53	0.708104	0.798914	0.716069	0.5844	0.660594	0.68745	0.68663	0.753776	0.808661	0.917228	0.740108	0.598851	0.856379	0.697292	0.981436	0.758963	0.533394	0.855565	0.632487	0.634076	0.657867	0.965724	0.113955	0.557555	0.565713	0.732959	0.808007	0.773699	0.759639	0.828634	0.92389	0.815442	0.635158
TCGA-F2-A7TX-01A	CAFclusterA	517.893	1708.03	2225.92	0.635692	0.833317	0.692207	0.699071	0.677574	0.892977	0.712835	0.912529	0.760453	0.917048	0.566297	0.826286	0.783835	0.733057	0.99894	0.734082	0.651003	0.897069	0.687519	0.708359	0.70188	0.935015	0.72043	0.680653	0.61528	0.784602	0.825071	0.846076	0.780542	0.834325	0.848573	0.77263	0.633086
TCGA-F2-A8YN-01A	CAFclusterA	525.815	760.823	1286.64	0.528554	0.734622	0.683443	0.567949	0.631381	0.640865	0.637945	0.772652	0.707766	0.913715	0.742016	0.618838	0.826692	0.463889	0.991331	0.724716	0.559737	0.842389	0.623926	0.577265	0.578944	0.861247	0.340799	0.473333	0.606928	0.686328	0.796763	0.742892	0.761527	0.808273	0.90172	0.797084	0.640112
TCGA-FB-A4P5-01A	CAFclusterA	1416.25	2481.47	3897.73	0.637396	0.794388	0.702311	0.809137	0.679553	0.941848	0.727677	0.926139	0.865995	0.926207	0.661005	0.806773	0.81973	0.745434	0.992714	0.758763	0.620699	0.89501	0.671834	0.725097	0.749059	0.959256	0.813945	0.683526	0.636044	0.848067	0.822318	0.867031	0.830825	0.86246	0.882559	0.802529	0.63833
TCGA-FB-A4P6-01A	CAFclusterB	727.322	1342.33	2069.65	0.559461	0.766088	0.674516	0.628749	0.647058	0.839729	0.680959	0.809058	0.776779	0.91257	0.694574	0.689955	0.783526	0.76147	0.987956	0.745669	0.618466	0.870762	0.649795	0.65688	0.672331	0.946419	0.574815	0.555884	0.546181	0.767509	0.79473	0.839438	0.810008	0.829544	0.82002	0.773052	0.633267
TCGA-FB-A545-01A	CAFclusterA	-38.3946	-303.743	-342.137	0.471588	0.746896	0.636044	0.574172	0.603038	0.551049	0.589474	0.747911	0.45735	0.847136	0.561079	0.59053	0.743477	0.634792	0.979875	0.659656	0.521999	0.820341	0.576943	0.509498	0.528611	0.780184	0.298592	0.449093	0.521366	0.613973	0.781964	0.765013	0.69589	0.789421	0.899104	0.791606	0.61272
TCGA-FB-A5VM-01A	CAFclusterA	801.021	1682.99	2484.01	0.744475	0.778807	0.674637	0.716538	0.672148	0.802407	0.691317	0.852168	0.852062	0.918795	0.798629	0.77527	0.815704	0.729944	0.989342	0.734397	0.607752	0.88575	0.736744	0.686196	0.701731	0.927721	0.691043	0.663627	0.602916	0.771213	0.80861	0.86173	0.768858	0.838468	0.877164	0.800691	0.635826
TCGA-FB-A78T-01A	CAFclusterA	52.6425	1129.93	1182.57	0.624879	0.743417	0.663929	0.543195	0.635213	0.702695	0.650371	0.744362	0.765044	0.913514	0.709699	0.663608	0.802354	0.576372	0.987487	0.7172	0.490731	0.84931	0.614571	0.626797	0.631212	0.934262	0.482446	0.53777	0.572205	0.70517	0.789498	0.800166	0.743123	0.815623	0.825814	0.737488	0.609403
TCGA-FB-A7DR-01A	CAFclusterA	1241.69	1075.06	2316.75	0.711985	0.814512	0.683086	0.551356	0.663504	0.751153	0.679371	0.803296	0.596156	0.881023	0.558346	0.71422	0.768855	0.769868	0.993919	0.738726	0.586487	0.87998	0.685113	0.648518	0.634	0.861611	0.512941	0.574129	0.529758	0.719074	0.799463	0.884913	0.819389	0.823726	0.862916	0.818579	0.644157
TCGA-FB-AAPP-01A	CAFclusterA	-1637.52	-603.093	-2240.61	0.464573	0.71254	0.57397	0.492273	0.564987	0.529239	0.548768	0.715695	0.503597	0.799167	0.414716	0.549393	0.637645	0.466865	0.985239	0.653796	0.577832	0.787019	0.536203	0.541176	0.499943	0.730291	0.263559	0.421858	0.398514	0.58042	0.73385	0.690275	0.713541	0.759464	0.619998	0.658438	0.604235
TCGA-FB-AAPQ-01A	CAFclusterA	75.5155	507.1	582.615	0.549854	0.72529	0.653763	0.582404	0.631574	0.64794	0.632776	0.696572	0.632721	0.929701	0.507253	0.637324	0.773511	0.601709	0.987992	0.72301	0.492663	0.835964	0.597688	0.576483	0.577353	0.841382	0.336525	0.509826	0.457766	0.662306	0.787146	0.783891	0.756446	0.790107	0.896643	0.766397	0.616152
TCGA-FB-AAPS-01A	CAFclusterA	1995.45	2076.93	4072.38	0.677007	0.7751	0.748372	0.774419	0.668651	0.827256	0.733688	0.859248	0.743609	0.939952	0.603571	0.760476	0.832453	0.679236	0.990372	0.757394	0.518954	0.872495	0.712167	0.692155	0.744667	0.954199	0.719933	0.591106	0.602606	0.810357	0.812864	0.855738	0.788664	0.845771	0.946774	0.830429	0.581896
TCGA-FB-AAPU-01A	CAFclusterA	-715.047	141.846	-573.201	0.55581	0.694066	0.682135	0.599274	0.608027	0.693626	0.627702	0.669835	0.63348	0.869346	0.697199	0.640881	0.689353	0.459638	0.989397	0.667787	0.356112	0.818036	0.603362	0.561596	0.589857	0.793775	0.5493	0.520025	0.549931	0.676864	0.785698	0.747501	0.732614	0.781007	0.792809	0.720865	0.609462
TCGA-FB-AAPY-01A	CAFclusterA	824.139	1929.9	2754.04	0.69891	0.770199	0.716536	0.742403	0.675797	0.808972	0.71701	0.841905	0.81056	0.940441	0.821849	0.753355	0.81367	0.693239	0.988631	0.751094	0.607326	0.887433	0.680688	0.689344	0.731935	0.943161	0.728827	0.617465	0.598492	0.799072	0.813402	0.850891	0.815165	0.849133	0.866556	0.774092	0.621452
TCGA-FB-AAPZ-01A	CAFclusterA	636.56	1408.11	2044.67	0.602004	0.734658	0.709945	0.641778	0.667072	0.822247	0.692206	0.811334	0.802791	0.919671	0.680456	0.729791	0.815274	0.683984	0.987253	0.749653	0.50436	0.874412	0.64539	0.655922	0.682557	0.938517	0.583701	0.604023	0.606449	0.764106	0.808287	0.737342	0.761418	0.831244	0.879859	0.777761	0.625405
TCGA-FB-AAQ0-01A	CAFclusterA	-306.086	4.86103	-301.225	0.603452	0.719609	0.665578	0.519564	0.610913	0.551559	0.60582	0.72515	0.579608	0.846354	0.439339	0.579274	0.701473	0.465103	0.991301	0.669365	0.434965	0.850775	0.566443	0.525774	0.560921	0.736808	0.301703	0.469801	0.49383	0.619316	0.769252	0.832503	0.674336	0.76608	0.867279	0.753952	0.595778
TCGA-FB-AAQ1-01A	CAFclusterA	236.739	1012.82	1249.56	0.665062	0.720098	0.663862	0.559149	0.636852	0.690392	0.654205	0.775599	0.747101	0.922933	0.74818	0.640538	0.813271	0.618645	0.986179	0.721105	0.465846	0.842873	0.644482	0.609145	0.64663	0.931757	0.498603	0.543502	0.554588	0.698597	0.786668	0.809934	0.747921	0.821077	0.81627	0.753614	0.630515
TCGA-FB-AAQ2-01A	CAFclusterA	-327.706	145.749	-181.957	0.538341	0.73554	0.616664	0.688444	0.626899	0.68373	0.616664	0.70198	0.726383	0.867309	0.663333	0.672084	0.758466	0.594412	0.980588	0.662627	0.455221	0.845844	0.588557	0.594409	0.614518	0.839267	0.650039	0.553036	0.540031	0.692299	0.788319	0.777449	0.745975	0.81219	0.838887	0.757044	0.627206
TCGA-FB-AAQ3-01A	CAFclusterA	689.376	1210.82	1900.19	0.621952	0.767135	0.724593	0.567284	0.659166	0.746169	0.678053	0.80263	0.74519	0.911123	0.631196	0.725629	0.779193	0.457381	0.991933	0.70611	0.654807	0.885164	0.666541	0.621337	0.63137	0.834623	0.424111	0.570564	0.644537	0.703001	0.789865	0.886507	0.751829	0.802342	0.877396	0.780071	0.629638
TCGA-FB-AAQ6-01A	CAFclusterA	-154.857	312.395	157.539	0.533868	0.711075	0.675213	0.601133	0.616332	0.63041	0.634067	0.736148	0.597975	0.892826	0.546107	0.657233	0.751172	0.491167	0.98872	0.69365	0.574189	0.837434	0.62039	0.565628	0.581587	0.836665	0.537002	0.478273	0.527137	0.664594	0.783501	0.779944	0.731105	0.80014	0.859716	0.766286	0.605529
TCGA-H6-8124-01A	CAFclusterA	278.81	103.62	382.431	0.511727	0.758071	0.645414	0.504903	0.608516	0.61249	0.602553	0.708282	0.545292	0.866754	0.699689	0.598828	0.797341	0.491991	0.962899	0.679844	0.394918	0.81193	0.545609	0.531129	0.552292	0.839656	0.279336	0.464012	0.500709	0.639054	0.788908	0.726543	0.733003	0.796913	0.926259	0.798776	0.594827
TCGA-H6-A45N-01A	CAFclusterA	1190.94	1557.52	2748.46	0.605447	0.773273	0.678645	0.705613	0.662274	0.821712	0.683457	0.847559	0.768567	0.922601	0.69946	0.740804	0.827372	0.650595	0.98973	0.746907	0.520728	0.878764	0.692258	0.648883	0.682824	0.952546	0.627656	0.572451	0.590054	0.777343	0.806735	0.813102	0.812678	0.838433	0.899985	0.80697	0.662631
TCGA-H8-A6C1-01A	CAFclusterA	444.187	1236.27	1680.46	0.598944	0.74936	0.700522	0.699161	0.658292	0.690417	0.678525	0.726233	0.723828	0.917186	0.792045	0.676041	0.775631	0.708822	0.993774	0.740592	0.501181	0.861713	0.628876	0.626833	0.677257	0.911066	0.625764	0.534	0.493802	0.737341	0.807874	0.822976	0.767993	0.831888	0.833523	0.774968	0.593724
TCGA-HV-A5A3-01A	CAFclusterA	-158.174	443.3	285.126	0.524344	0.707983	0.664556	0.55115	0.625374	0.603713	0.63266	0.726258	0.693109	0.874115	0.622089	0.628579	0.788361	0.388094	0.982513	0.717162	0.48294	0.851681	0.592838	0.570853	0.633699	0.855971	0.455644	0.495305	0.586052	0.661741	0.788161	0.79332	0.706293	0.798134	0.887719	0.773867	0.608263
TCGA-HV-A5A4-01A	CAFclusterA	726.91	920.033	1646.94	0.707899	0.771748	0.683436	0.587338	0.642201	0.703935	0.654411	0.766272	0.665078	0.919115	0.719494	0.692758	0.787972	0.491994	0.989947	0.735738	0.498284	0.873854	0.659792	0.604871	0.630195	0.914762	0.428538	0.542689	0.524097	0.709518	0.792437	0.856253	0.76495	0.814841	0.891679	0.798123	0.61077
TCGA-HV-A5A5-01A	CAFclusterA	835.207	1370.6	2205.81	0.592802	0.782129	0.6637	0.603863	0.668846	0.66851	0.685611	0.799207	0.727256	0.922825	0.725122	0.70474	0.815797	0.586081	0.993261	0.752369	0.476573	0.874644	0.680975	0.643125	0.689603	0.936669	0.614759	0.605023	0.65738	0.752897	0.810097	0.847223	0.812153	0.828113	0.873319	0.791663	0.647399
TCGA-HV-A5A6-01A	CAFclusterA	311.652	311.877	623.529	0.535102	0.756222	0.643084	0.561123	0.626422	0.615116	0.631784	0.728416	0.600603	0.884769	0.526552	0.665545	0.794547	0.539888	0.991843	0.699437	0.554264	0.86849	0.554586	0.578744	0.600288	0.821372	0.329826	0.502205	0.594158	0.651739	0.778945	0.819314	0.740382	0.806912	0.918486	0.793742	0.592205
TCGA-HV-A7OL-01A	CAFclusterA	399.42	1954.3	2353.72	0.742281	0.821639	0.708926	0.78034	0.677586	0.768173	0.729667	0.858813	0.764739	0.947119	0.613806	0.805275	0.833774	0.712466	0.991829	0.753892	0.493536	0.896577	0.735593	0.720004	0.731283	0.912987	0.799012	0.665718	0.584365	0.799217	0.801522	0.908274	0.718604	0.838256	0.863518	0.777663	0.635771
TCGA-HV-A7OP-01A	CAFclusterB	-1460.57	220.289	-1240.28	0.505366	0.51608	0.607856	0.494301	0.568237	0.642688	0.553292	0.748058	0.52712	0.90087	0.503138	0.625727	0.709597	0.505856	0.966649	0.649903	0.325661	0.814091	0.593454	0.498475	0.551417	0.7796	0.342716	0.525508	0.470549	0.617341	0.724262	0.739972	0.65669	0.76422	0.588301	0.686717	0.638714
TCGA-HV-AA8V-01A	CAFclusterA	1399.53	1045.31	2444.84	0.560441	0.782184	0.674248	0.584517	0.641167	0.704981	0.659512	0.792339	0.743547	0.907581	0.645256	0.631603	0.841729	0.678822	0.984617	0.728987	0.495503	0.844176	0.644158	0.624841	0.650188	0.93645	0.419779	0.524855	0.602289	0.716826	0.799328	0.829876	0.75514	0.81508	0.929394	0.825948	0.642773
TCGA-HV-AA8X-01A	CAFclusterA	-317.219	178.105	-139.114	0.674425	0.71719	0.674754	0.555829	0.627653	0.610594	0.619804	0.682232	0.622828	0.934585	0.596206	0.611775	0.749983	0.613843	0.996783	0.659365	0.420392	0.862718	0.636121	0.528289	0.559531	0.821858	0.248895	0.492484	0.518321	0.64543	0.78004	0.883946	0.738632	0.789954	0.835893	0.755658	0.61812
TCGA-HZ-7289-01A	CAFclusterA	-1090.7	-313.095	-1403.8	0.493811	0.715864	0.561854	0.531566	0.611701	0.649593	0.594002	0.769566	0.424542	0.779589	0.359309	0.665663	0.68897	0.433545	0.985629	0.677347	0.534979	0.822515	0.634375	0.560863	0.533242	0.720615	0.389175	0.543585	0.486243	0.627426	0.755665	0.73272	0.648483	0.783111	0.761748	0.7312	0.610923
TCGA-HZ-7918-01A	CAFclusterA	1570.53	2473.09	4043.62	0.761448	0.831298	0.734658	0.705907	0.679242	0.904672	0.739243	0.9113	0.72585	0.944262	0.691247	0.834938	0.8392	0.679776	0.994175	0.796383	0.638973	0.88136	0.736827	0.749688	0.725422	0.983716	0.724641	0.685014	0.655539	0.835697	0.83935	0.812201	0.776169	0.84856	0.880638	0.769038	0.643099
TCGA-HZ-7919-01A	CAFclusterA	762.09	1093.18	1855.27	0.612854	0.806515	0.736693	0.62518	0.659066	0.79983	0.684233	0.811571	0.794151	0.905177	0.697895	0.737336	0.789049	0.700294	0.989988	0.74404	0.527687	0.884973	0.642462	0.657687	0.662615	0.935599	0.572951	0.617991	0.625049	0.743646	0.819731	0.830776	0.733576	0.824079	0.877104	0.782727	0.641433
TCGA-HZ-7920-01A	CAFclusterB	1361.36	1869.02	3230.38	0.65711	0.766191	0.675711	0.74958	0.663034	0.892952	0.683314	0.85054	0.771624	0.908207	0.640982	0.747528	0.771144	0.755634	0.983765	0.777863	0.57283	0.85719	0.632752	0.693754	0.675358	0.968544	0.665497	0.614023	0.590628	0.806285	0.815078	0.73439	0.821471	0.852098	0.824037	0.775687	0.647645
TCGA-HZ-7922-01A	CAFclusterA	1415.4	1157.34	2572.74	0.580401	0.76908	0.721075	0.725813	0.664068	0.737415	0.688948	0.791092	0.786135	0.904112	0.708745	0.735711	0.821632	0.734309	0.981258	0.765202	0.456529	0.877239	0.628338	0.655498	0.657587	0.932584	0.664236	0.56213	0.64442	0.758173	0.811664	0.765108	0.765732	0.835279	0.92268	0.808411	0.602062
TCGA-HZ-7923-01A	CAFclusterB	1915.97	2473.58	4389.55	0.708096	0.80551	0.718429	0.713575	0.693063	0.884831	0.727044	0.881739	0.929366	0.91581	0.830247	0.75365	0.81223	0.809779	0.986306	0.809634	0.584341	0.876867	0.694957	0.719193	0.748668	0.979996	0.674757	0.654301	0.647665	0.837217	0.830301	0.796568	0.835062	0.862008	0.892067	0.782979	0.621702
TCGA-HZ-7924-01A	CAFclusterB	104.432	1000.51	1104.94	0.600458	0.757036	0.646169	0.709043	0.651145	0.737537	0.668486	0.79264	0.776367	0.881057	0.668303	0.695218	0.730487	0.790626	0.981486	0.759819	0.609526	0.861317	0.660246	0.649079	0.662959	0.92439	0.669307	0.561571	0.566858	0.772422	0.803301	0.758	0.792781	0.828197	0.670767	0.731691	0.652722
TCGA-HZ-7925-01A	CAFclusterA	1866.9	1196.14	3063.04	0.659665	0.786957	0.722171	0.583144	0.675701	0.699607	0.675671	0.779824	0.839302	0.921057	0.604659	0.657163	0.822808	0.591872	0.995217	0.782977	0.441446	0.87	0.667794	0.636755	0.654039	0.930444	0.501287	0.5897	0.616359	0.7232	0.823678	0.845491	0.750272	0.819435	0.923216	0.824093	0.612436
TCGA-HZ-7926-01A	CAFclusterA	319.031	1082.62	1401.65	0.63981	0.78087	0.692649	0.771971	0.669049	0.824314	0.677297	0.796855	0.768737	0.905941	0.729161	0.704976	0.768955	0.701429	0.981785	0.746324	0.526406	0.869394	0.695577	0.653353	0.659763	0.882205	0.729567	0.582365	0.557638	0.769694	0.810734	0.8097	0.821302	0.842471	0.844297	0.769763	0.63343
TCGA-HZ-8001-01A	CAFclusterA	1737.21	2108.01	3845.22	0.629874	0.789817	0.704714	0.736347	0.683669	0.849211	0.709391	0.890887	0.828154	0.930898	0.737027	0.770682	0.824654	0.832092	0.985363	0.778577	0.514998	0.87707	0.70914	0.688486	0.706684	0.962101	0.722449	0.663092	0.614389	0.807151	0.811661	0.822293	0.828707	0.850506	0.881425	0.810309	0.640777
TCGA-HZ-8002-01A	CAFclusterA	1598.93	1674.28	3273.2	0.586874	0.781214	0.691389	0.66872	0.666456	0.855995	0.694139	0.859954	0.832077	0.924418	0.742492	0.729846	0.831176	0.797097	0.982731	0.792274	0.586828	0.860557	0.649477	0.68767	0.672004	0.955391	0.636787	0.605522	0.611014	0.783625	0.819099	0.774131	0.834876	0.849516	0.877902	0.79027	0.614722
TCGA-HZ-8003-01A	CAFclusterA	1543.21	2246.03	3789.24	0.654633	0.808335	0.711839	0.728283	0.678636	0.836787	0.725928	0.860979	0.779959	0.942042	0.654373	0.797857	0.841489	0.713531	0.99258	0.796253	0.606396	0.896732	0.715284	0.71494	0.702586	0.974355	0.689839	0.667842	0.590457	0.818537	0.824111	0.839647	0.772021	0.857241	0.886357	0.781776	0.646665
TCGA-HZ-8315-01A	CAFclusterA	1324.54	1519.95	2844.49	0.634404	0.807212	0.708526	0.654455	0.668135	0.796596	0.693591	0.811313	0.792428	0.930202	0.733091	0.756235	0.810304	0.69732	0.987487	0.763795	0.52849	0.892008	0.655097	0.666208	0.655313	0.931806	0.524481	0.640614	0.622417	0.767179	0.808503	0.820867	0.780869	0.836897	0.881747	0.795215	0.614397
TCGA-HZ-8317-01A	CAFclusterA	1016.63	685.457	1702.09	0.628096	0.738356	0.650179	0.558977	0.658818	0.652657	0.644378	0.75931	0.731047	0.887682	0.622501	0.61623	0.771673	0.775426	0.98479	0.751204	0.494879	0.857308	0.611576	0.587267	0.620649	0.891104	0.490066	0.553629	0.574157	0.699607	0.791803	0.786601	0.824205	0.82029	0.831223	0.79845	0.630529
TCGA-HZ-8519-01A	CAFclusterB	1223.58	1428.45	2652.03	0.559503	0.761638	0.659238	0.645039	0.647811	0.879288	0.659617	0.85345	0.705033	0.903674	0.622323	0.740525	0.800327	0.762354	0.983893	0.730916	0.57902	0.857904	0.668504	0.648843	0.660686	0.924487	0.648262	0.568222	0.583005	0.765559	0.812459	0.783033	0.827982	0.829881	0.817867	0.777986	0.62901
TCGA-HZ-8636-01A	CAFclusterA	1329.45	1397.96	2727.41	0.661828	0.798201	0.695639	0.609153	0.668913	0.67167	0.691205	0.780329	0.867047	0.914947	0.804108	0.683686	0.818632	0.705156	0.984459	0.759909	0.383993	0.862902	0.63335	0.658784	0.691033	0.961372	0.508623	0.597276	0.626739	0.749291	0.822811	0.767615	0.752559	0.83404	0.944066	0.810524	0.619178
TCGA-HZ-8637-01A	CAFclusterA	1472.83	3019.97	4492.81	0.78252	0.904079	0.729391	0.78196	0.701963	0.897159	0.760695	0.921847	0.795008	0.951907	0.792879	0.85771	0.841872	0.687149	1	0.795831	0.651794	0.907226	0.774436	0.793211	0.788209	0.987582	0.777458	0.743779	0.642018	0.857941	0.850571	0.860846	0.778332	0.869999	0.870074	0.764832	0.617272
TCGA-HZ-8638-01A	CAFclusterA	43.434	861.613	905.047	0.534718	0.76618	0.655885	0.600664	0.662491	0.825918	0.65867	0.874838	0.653089	0.927016	0.601388	0.755755	0.706751	0.735509	0.993695	0.782617	0.513321	0.86678	0.626243	0.625405	0.639962	0.817603	0.524851	0.599425	0.536678	0.739416	0.790271	0.794752	0.828213	0.807759	0.719669	0.738307	0.597852
TCGA-HZ-A49G-01A	CAFclusterA	1343.18	1907.2	3250.37	0.695266	0.814318	0.698172	0.624058	0.672055	0.822612	0.698495	0.810685	0.859288	0.918039	0.698411	0.698468	0.847427	0.759	0.992613	0.762146	0.461028	0.875786	0.64223	0.674079	0.703717	0.977711	0.528142	0.602914	0.601896	0.773406	0.815101	0.83655	0.76183	0.838677	0.875709	0.786222	0.634798
TCGA-HZ-A49H-01A	CAFclusterB	1297.51	2037.04	3334.55	0.619488	0.801324	0.670945	0.683151	0.691105	0.857308	0.70596	0.88462	0.85502	0.926002	0.759803	0.775262	0.770754	0.824482	0.988479	0.787381	0.60829	0.868167	0.730115	0.685008	0.72244	0.948485	0.682807	0.642516	0.623986	0.798367	0.816671	0.808957	0.816218	0.845495	0.813682	0.790481	0.617193
TCGA-HZ-A49I-01A	CAFclusterA	758.199	1694.39	2452.59	0.6284	0.77544	0.700319	0.679301	0.66672	0.727909	0.688667	0.781871	0.826644	0.928569	0.720388	0.706669	0.802455	0.556343	0.992714	0.786063	0.517171	0.878471	0.693119	0.668979	0.671883	0.959962	0.621338	0.607381	0.558498	0.758685	0.80095	0.879937	0.790515	0.838615	0.855529	0.780786	0.603385
TCGA-HZ-A4BH-01A	CAFclusterA	1079.36	1629.74	2709.09	0.656772	0.798106	0.704081	0.742562	0.688006	0.792244	0.708124	0.818091	0.799091	0.915973	0.637664	0.785265	0.803069	0.695264	0.998892	0.752625	0.498641	0.915302	0.704906	0.691058	0.706426	0.934019	0.746301	0.643906	0.617951	0.794721	0.824548	0.872974	0.798493	0.839604	0.878972	0.804077	0.626016
TCGA-HZ-A4BK-01A	CAFclusterA	563.112	1570.06	2133.17	0.567164	0.787805	0.698613	0.637076	0.651348	0.837541	0.692138	0.833175	0.752057	0.937022	0.771028	0.725929	0.814475	0.740594	0.990631	0.759723	0.592242	0.872179	0.684779	0.675888	0.677028	0.952473	0.610506	0.589166	0.638326	0.769206	0.803885	0.837488	0.795339	0.840475	0.833582	0.775298	0.595595
TCGA-HZ-A77O-01A	CAFclusterA	220.168	787.828	1008	0.603869	0.773342	0.634249	0.538566	0.64585	0.681663	0.639515	0.722831	0.751244	0.923761	0.667042	0.698734	0.80787	0.610984	0.996005	0.70192	0.555811	0.850968	0.644099	0.615089	0.618209	0.882449	0.418871	0.572523	0.536493	0.692048	0.799565	0.798799	0.726602	0.817796	0.881993	0.780702	0.612683
TCGA-HZ-A77P-01A	CAFclusterA	1234.77	1187.48	2422.25	0.542982	0.732554	0.666365	0.578087	0.655567	0.77678	0.658214	0.82079	0.840268	0.892579	0.63833	0.685231	0.799484	0.766157	0.980874	0.720021	0.518058	0.869749	0.651558	0.632464	0.638429	0.924074	0.490157	0.550113	0.549553	0.740725	0.792299	0.783137	0.834323	0.826229	0.830971	0.807089	0.625137
TCGA-HZ-A77Q-01A	CAFclusterA	1896.6	2115.95	4012.54	0.702846	0.810851	0.743048	0.793366	0.694158	0.845589	0.721364	0.858337	0.867679	0.918776	0.731522	0.751913	0.841557	0.794102	0.992906	0.806285	0.529417	0.898559	0.751281	0.693533	0.724937	0.946565	0.754882	0.650869	0.633648	0.812349	0.827144	0.862339	0.833085	0.859397	0.918944	0.821943	0.605485
TCGA-HZ-A8P0-01A	CAFclusterA	617.562	713.833	1331.39	0.504041	0.706213	0.672596	0.625802	0.626237	0.698416	0.644337	0.781099	0.557923	0.893189	0.58211	0.633061	0.787112	0.597275	0.977617	0.732974	0.464554	0.827175	0.607979	0.588075	0.653092	0.891299	0.599801	0.480952	0.535936	0.712009	0.79036	0.75922	0.795043	0.813474	0.867341	0.788277	0.57923
TCGA-HZ-A8P1-01A	CAFclusterA	-237.661	214.308	-23.3534	0.524681	0.713868	0.633199	0.542337	0.598027	0.66124	0.599134	0.719737	0.649535	0.865709	0.599814	0.601171	0.75607	0.538668	0.982022	0.691322	0.481294	0.840177	0.636828	0.56335	0.558641	0.840483	0.437828	0.476858	0.499481	0.661444	0.772664	0.782298	0.7375	0.788709	0.814237	0.730348	0.579042
TCGA-HZ-A9TJ-01A	CAFclusterA	-72.9171	394.029	321.112	0.592831	0.742936	0.627439	0.582134	0.621311	0.644293	0.63253	0.667946	0.59892	0.915265	0.551435	0.657422	0.778848	0.555611	0.987213	0.686747	0.465165	0.855244	0.642725	0.59007	0.610346	0.862025	0.374419	0.512519	0.538729	0.681859	0.786404	0.813205	0.798833	0.78988	0.79939	0.753374	0.597157
TCGA-IB-7644-01A	CAFclusterA	658.306	811.381	1469.69	0.584044	0.776373	0.679883	0.579151	0.647102	0.734522	0.66596	0.775886	0.754949	0.899224	0.720574	0.659969	0.783583	0.74217	0.983034	0.731313	0.515646	0.868968	0.624602	0.628258	0.655774	0.90861	0.442205	0.558714	0.60138	0.71887	0.809423	0.791463	0.771964	0.807396	0.885057	0.785538	0.594285
TCGA-IB-7645-01A	CAFclusterA	1959.33	2361.19	4320.52	0.725811	0.812393	0.740096	0.739348	0.695639	0.904404	0.725554	0.88506	0.86977	0.938587	0.726359	0.774281	0.844175	0.774598	0.989602	0.808773	0.610651	0.881186	0.698556	0.722179	0.724967	0.973529	0.675203	0.660459	0.681415	0.825279	0.83044	0.773513	0.824678	0.862898	0.90112	0.788777	0.59682
TCGA-IB-7646-01A	CAFclusterA	1482.51	1525.62	3008.13	0.669195	0.87351	0.726276	0.607695	0.667966	0.769145	0.703124	0.802866	0.753722	0.936951	0.597189	0.773345	0.829166	0.682177	0.996227	0.783577	0.599241	0.893588	0.654622	0.701339	0.636929	0.9462	0.507621	0.639113	0.582943	0.735911	0.815754	0.851021	0.724719	0.837624	0.925676	0.793818	0.615238
TCGA-IB-7649-01A	CAFclusterA	1405.92	2013.93	3419.85	0.615627	0.788507	0.705373	0.69471	0.671795	0.831608	0.702325	0.877474	0.822147	0.932017	0.758649	0.721813	0.840772	0.831031	0.985463	0.779335	0.627029	0.872639	0.693714	0.706438	0.691316	0.969809	0.5748	0.613879	0.658293	0.794441	0.827379	0.798923	0.838365	0.845551	0.869484	0.786676	0.675734
TCGA-IB-7651-01A	CAFclusterA	1260.92	1660.05	2920.97	0.6092	0.836452	0.742926	0.684642	0.674233	0.86487	0.722	0.858575	0.691357	0.93326	0.601302	0.800638	0.830099	0.71079	0.998309	0.74924	0.547918	0.899441	0.693362	0.724659	0.696384	0.968301	0.688045	0.664173	0.640643	0.78158	0.827001	0.875591	0.734667	0.829938	0.898642	0.784437	0.624187
TCGA-IB-7654-01A	CAFclusterA	1084.38	634.93	1719.31	0.566826	0.76424	0.70488	0.652939	0.641152	0.694355	0.650859	0.77711	0.644993	0.929365	0.586576	0.689789	0.79316	0.630104	0.991929	0.708414	0.49869	0.870244	0.658675	0.594767	0.598234	0.868273	0.592296	0.522561	0.526367	0.711376	0.804404	0.861154	0.789417	0.812992	0.912542	0.78826	0.654094
TCGA-IB-8126-01A	CAFclusterB	1326.66	2055.93	3382.59	0.738574	0.774053	0.692376	0.748858	0.670644	0.910385	0.706032	0.928115	0.756839	0.924806	0.570377	0.79574	0.790724	0.783101	0.984162	0.783951	0.620375	0.870924	0.687853	0.694151	0.718901	0.952278	0.736033	0.654988	0.604163	0.821514	0.815842	0.801111	0.840286	0.849085	0.838089	0.772121	0.646737
TCGA-IB-8127-01A	CAFclusterA	1027.65	1354.46	2382.11	0.632975	0.800564	0.709781	0.619405	0.656352	0.828812	0.687995	0.82369	0.789967	0.932142	0.692554	0.713189	0.831069	0.657584	0.991407	0.745254	0.519803	0.899672	0.671162	0.67447	0.678296	0.935283	0.57091	0.605771	0.602715	0.762566	0.81862	0.869075	0.762312	0.829818	0.904931	0.794839	0.613757
TCGA-IB-A5SO-01A	CAFclusterA	1508.03	1717.09	3225.12	0.659366	0.786124	0.733857	0.764819	0.661407	0.813178	0.709413	0.8677	0.742323	0.91457	0.500515	0.753894	0.823733	0.688801	0.990878	0.748306	0.521	0.88579	0.687566	0.672253	0.693164	0.944425	0.73339	0.598893	0.603059	0.794685	0.817985	0.876278	0.82065	0.845095	0.911789	0.808161	0.629705
TCGA-IB-A5SP-01A	CAFclusterA	-432.308	681.649	249.341	0.549989	0.742751	0.651559	0.557935	0.625194	0.653654	0.633698	0.819112	0.688749	0.91751	0.596473	0.651722	0.799673	0.563569	0.991425	0.689373	0.537522	0.863302	0.632488	0.600333	0.575021	0.869027	0.394722	0.512723	0.473114	0.682015	0.793879	0.834057	0.757078	0.804789	0.776584	0.730463	0.620334
TCGA-IB-A5SQ-01A	CAFclusterA	1414.83	1427.39	2842.23	0.705126	0.767339	0.738311	0.701875	0.672376	0.75694	0.702634	0.788515	0.856939	0.917598	0.757841	0.725018	0.825273	0.683397	0.990331	0.759517	0.456381	0.863501	0.680491	0.671545	0.680914	0.945276	0.680182	0.611977	0.593283	0.763842	0.820503	0.800326	0.802169	0.842714	0.912419	0.820777	0.63337
TCGA-IB-A5SS-01A	CAFclusterA	1342.11	1172.27	2514.38	0.714099	0.827134	0.70227	0.606058	0.663963	0.709454	0.683095	0.814813	0.800485	0.90434	0.606987	0.694625	0.847456	0.648269	0.985965	0.75127	0.510489	0.866587	0.715918	0.64629	0.645535	0.926433	0.510781	0.5759	0.577133	0.727525	0.807275	0.845374	0.736316	0.845292	0.94203	0.823223	0.629328
TCGA-IB-A5ST-01A	CAFclusterA	1518.6	2452.07	3970.67	0.682502	0.754787	0.735749	0.86905	0.683832	0.806005	0.729304	0.892503	0.832315	0.925139	0.664244	0.749088	0.816706	0.768021	0.995441	0.806081	0.54171	0.886786	0.732812	0.706363	0.751797	0.954564	0.821118	0.62811	0.580095	0.84888	0.824088	0.840232	0.825056	0.861682	0.893653	0.792643	0.598833
TCGA-IB-A6UF-01A	CAFclusterA	-34.5619	381.198	346.637	0.520139	0.727622	0.704927	0.511513	0.599028	0.631236	0.620853	0.700018	0.47069	0.870394	0.582936	0.612306	0.739871	0.669183	0.977752	0.704755	0.533707	0.837593	0.582648	0.547919	0.54964	0.852542	0.462541	0.447016	0.449315	0.640908	0.766179	0.790261	0.729425	0.802961	0.819304	0.759932	0.585036
TCGA-IB-A6UG-01A	CAFclusterA	-168.339	758.513	590.174	0.557099	0.731983	0.671921	0.737389	0.639174	0.741573	0.664171	0.770069	0.73946	0.904123	0.650383	0.700434	0.757712	0.622985	0.977339	0.707085	0.504006	0.850725	0.610769	0.629524	0.674196	0.871288	0.682105	0.542489	0.582233	0.73811	0.795808	0.751142	0.784	0.821561	0.811183	0.759737	0.611508
TCGA-IB-A7LX-01A	CAFclusterA	-164.373	191.335	26.9621	0.545187	0.749821	0.660311	0.541099	0.619299	0.722122	0.629043	0.719319	0.627068	0.881426	0.561012	0.677569	0.765827	0.627011	0.990086	0.698613	0.485957	0.845776	0.598406	0.610204	0.593476	0.843473	0.508309	0.523481	0.533229	0.676864	0.776946	0.790676	0.772539	0.798321	0.868276	0.766045	0.616525
TCGA-IB-A7M4-01A	CAFclusterA	65.685	1116.28	1181.97	0.586473	0.761648	0.738047	0.716579	0.653194	0.814637	0.688953	0.828854	0.831783	0.922657	0.628101	0.755141	0.789266	0.593018	0.995369	0.722252	0.484043	0.885143	0.630562	0.645347	0.69208	0.878023	0.729012	0.633154	0.585344	0.765529	0.802524	0.813642	0.717258	0.826031	0.883866	0.780131	0.610915
TCGA-IB-AAUM-01A	CAFclusterB	434.004	1171.43	1605.44	0.572753	0.735758	0.640416	0.678183	0.640936	0.786797	0.65954	0.808351	0.762484	0.902163	0.626881	0.713249	0.778036	0.66674	0.979517	0.716835	0.525935	0.826275	0.629997	0.636079	0.654723	0.907443	0.636826	0.601153	0.530852	0.752647	0.794473	0.755293	0.802863	0.8249	0.816252	0.76047	0.643466
TCGA-IB-AAUN-01A	CAFclusterA	390.301	709.715	1100.02	0.545885	0.789713	0.659993	0.653831	0.649591	0.745536	0.654787	0.743649	0.752201	0.94769	0.646192	0.743667	0.762387	0.619386	0.998883	0.695778	0.510729	0.861466	0.66385	0.630196	0.622847	0.874692	0.615432	0.562894	0.572786	0.703675	0.79661	0.820642	0.758946	0.824221	0.870244	0.786714	0.625414
TCGA-IB-AAUO-01A	CAFclusterA	68.4223	1106.7	1175.12	0.633588	0.800603	0.696284	0.546302	0.654041	0.718621	0.679286	0.826806	0.636977	0.92135	0.826752	0.737903	0.769205	0.584418	0.99663	0.713615	0.618455	0.885565	0.621363	0.658757	0.636802	0.899201	0.582044	0.567287	0.522751	0.707533	0.783651	0.9002	0.71953	0.812922	0.874364	0.763776	0.604424
TCGA-IB-AAUP-01A	CAFclusterA	1492.34	2830.32	4322.67	0.667802	0.784294	0.721206	0.902744	0.676819	0.855095	0.747456	0.89918	0.787535	0.960388	0.776162	0.795254	0.813589	0.746847	0.992116	0.785712	0.602657	0.883255	0.770603	0.732439	0.789119	0.973164	0.855699	0.680327	0.611831	0.881991	0.826417	0.830283	0.813242	0.865105	0.889608	0.785402	0.578333
TCGA-IB-AAUQ-01A	CAFclusterB	911.195	726.647	1637.84	0.615898	0.786942	0.66615	0.552018	0.629893	0.685262	0.648006	0.731551	0.582344	0.903614	0.497216	0.649581	0.790547	0.672662	0.990653	0.711706	0.508915	0.871294	0.619137	0.590225	0.610152	0.931004	0.474754	0.529708	0.547821	0.694682	0.800729	0.856092	0.726986	0.81127	0.910573	0.813942	0.630204
TCGA-IB-AAUR-01A	CAFclusterA	1545.49	2991.77	4537.27	0.768682	0.791597	0.740016	0.918365	0.69457	0.939781	0.761533	0.940882	0.88858	0.927061	0.845503	0.814364	0.798174	0.839162	0.991988	0.801267	0.613054	0.871465	0.78498	0.746176	0.802439	0.972799	0.868919	0.711999	0.645091	0.88991	0.835097	0.77105	0.843356	0.876318	0.858186	0.788958	0.569641
TCGA-IB-AAUS-01A	CAFclusterA	2163.75	2631.2	4794.95	0.649353	0.822305	0.738617	0.683588	0.683552	0.872018	0.741997	0.903929	0.893299	0.938918	0.734206	0.756144	0.897253	0.742839	0.991844	0.810835	0.599141	0.894311	0.770073	0.736322	0.743846	0.970684	0.63412	0.640324	0.642071	0.820192	0.834357	0.866523	0.827866	0.863656	0.923797	0.820327	0.609249
TCGA-IB-AAUT-01A	CAFclusterA	1244.37	2015.12	3259.49	0.613398	0.780508	0.689097	0.645423	0.659229	0.899347	0.714582	0.896943	0.649153	0.940473	0.706698	0.765793	0.822697	0.702075	0.991873	0.753653	0.63688	0.877652	0.717871	0.695671	0.719098	0.963755	0.619003	0.590896	0.570313	0.801262	0.809334	0.823781	0.814116	0.836624	0.876246	0.777685	0.627378
TCGA-IB-AAUU-01A	CAFclusterA	438.316	1217.9	1656.22	0.624819	0.773978	0.693755	0.581534	0.6599	0.666443	0.683161	0.744529	0.80412	0.902464	0.706509	0.656746	0.810347	0.64237	0.988369	0.742357	0.45741	0.880638	0.645729	0.648944	0.656517	0.929399	0.477118	0.566966	0.560239	0.725522	0.807341	0.86087	0.755429	0.82343	0.874151	0.775232	0.630958
TCGA-IB-AAUV-01A	CAFclusterA	2117.66	2202.46	4320.12	0.567707	0.764267	0.683035	0.764991	0.655947	0.905693	0.700905	0.887524	0.715653	0.930017	0.72	0.75511	0.825062	0.78426	0.979724	0.79016	0.650015	0.847247	0.699299	0.708666	0.705935	0.951646	0.757693	0.584049	0.625165	0.816563	0.809587	0.764798	0.823932	0.857244	0.908235	0.817859	0.57366
TCGA-IB-AAUW-01A	CAFclusterB	854.005	1345.14	2199.14	0.655127	0.74977	0.652714	0.723784	0.660643	0.845102	0.665607	0.819085	0.72462	0.909537	0.614527	0.730304	0.775304	0.77038	0.981301	0.779756	0.56811	0.876875	0.672538	0.648863	0.647473	0.925363	0.675866	0.564258	0.523328	0.773493	0.802852	0.821824	0.840522	0.843473	0.760057	0.762534	0.638581
TCGA-L1-A7W4-01A	CAFclusterA	114.389	-145.631	-31.2417	0.619788	0.699411	0.593177	0.538628	0.608146	0.655939	0.599169	0.628429	0.643186	0.800369	0.427112	0.630762	0.758876	0.565526	0.981639	0.670565	0.580878	0.827702	0.525967	0.543517	0.588851	0.813202	0.53562	0.478575	0.583102	0.647125	0.777528	0.751886	0.722019	0.797721	0.874716	0.766605	0.59285
TCGA-LB-A7SX-01A	CAFclusterA	-512.424	445.816	-66.6086	0.543789	0.689993	0.596351	0.604331	0.629717	0.701577	0.617044	0.732159	0.600354	0.920277	0.449377	0.655327	0.735658	0.620692	0.986929	0.664484	0.459413	0.839507	0.577168	0.552778	0.632268	0.792268	0.415575	0.498847	0.545436	0.683456	0.772742	0.813296	0.782952	0.802034	0.781757	0.73791	0.632911
TCGA-LB-A8F3-01A	CAFclusterB	-5.65388	349.03	343.376	0.586802	0.710682	0.657403	0.530077	0.622904	0.609232	0.614638	0.681683	0.587496	0.893732	0.393726	0.615326	0.750379	0.577573	0.987263	0.722275	0.475558	0.840156	0.620221	0.552521	0.565185	0.83314	0.453344	0.495825	0.511056	0.648766	0.773454	0.816519	0.728075	0.798552	0.83908	0.763243	0.628437
TCGA-LB-A9Q5-01A	CAFclusterA	949.69	1560.63	2510.32	0.637283	0.766133	0.698029	0.631575	0.659897	0.753438	0.674301	0.792274	0.840655	0.887461	0.728438	0.702844	0.821733	0.694495	0.984952	0.795127	0.54892	0.862462	0.663671	0.639159	0.661337	0.944668	0.553241	0.608686	0.541035	0.744925	0.805306	0.783943	0.78909	0.833987	0.854569	0.773987	0.625851
TCGA-M8-A5N4-01A	CAFclusterA	904.212	1387.82	2292.03	0.599383	0.77486	0.692577	0.587059	0.658865	0.700337	0.668171	0.76201	0.692867	0.936519	0.513211	0.718257	0.82559	0.587156	0.998076	0.737634	0.550531	0.872993	0.643965	0.631314	0.615499	0.908781	0.580113	0.582135	0.530551	0.708351	0.799204	0.847676	0.737281	0.826101	0.898249	0.771371	0.613054
TCGA-OE-A75W-01A	CAFclusterA	600.675	1374.07	1974.75	0.69993	0.769751	0.688921	0.543597	0.647478	0.797836	0.691542	0.879929	0.833673	0.937518	0.659503	0.756973	0.805089	0.646258	0.991765	0.699648	0.543589	0.862121	0.666945	0.645335	0.679888	0.928305	0.536406	0.601472	0.538505	0.72716	0.788919	0.802365	0.672153	0.810544	0.882079	0.794847	0.597676
TCGA-PZ-A5RE-01A	CAFclusterA	928.547	1488.77	2417.32	0.615686	0.804416	0.713433	0.598638	0.658707	0.651636	0.697671	0.785402	0.807221	0.938625	0.796964	0.64728	0.857224	0.70113	0.99035	0.765706	0.427394	0.892355	0.702122	0.672489	0.656284	0.939416	0.44405	0.548863	0.564547	0.741233	0.799155	0.881888	0.760934	0.834988	0.917142	0.804176	0.629512
TCGA-Q3-A5QY-01A	CAFclusterA	1386.11	3212.65	4598.76	0.775046	0.787396	0.75908	0.919954	0.694337	0.90737	0.784589	0.896267	0.878221	0.959904	0.799699	0.823004	0.825637	0.642297	0.990804	0.800127	0.547164	0.87525	0.824677	0.773033	0.838688	0.982865	0.851653	0.722756	0.710063	0.905245	0.828769	0.814495	0.791208	0.875652	0.86528	0.771286	0.565597
TCGA-Q3-AA2A-01A	CAFclusterA	234.583	1011.64	1246.22	0.542211	0.759988	0.677734	0.5952	0.635286	0.607798	0.653026	0.845336	0.679824	0.92285	0.656114	0.65247	0.817293	0.505715	0.985787	0.702982	0.503467	0.851432	0.642416	0.61333	0.621029	0.870899	0.515438	0.495296	0.527028	0.69513	0.78641	0.785306	0.733087	0.828747	0.866567	0.750405	0.597355
TCGA-RB-A7B8-01A	CAFclusterA	1194.54	1431.8	2626.34	0.614671	0.77533	0.711103	0.665475	0.651323	0.770969	0.684999	0.812704	0.647307	0.899866	0.705131	0.727922	0.828637	0.656219	0.985112	0.74045	0.487635	0.861496	0.651766	0.649232	0.686735	0.924317	0.612497	0.564707	0.567482	0.749365	0.803898	0.803871	0.752514	0.835568	0.909844	0.808655	0.620765
TCGA-RB-AA9M-01A	CAFclusterA	423.286	633.525	1056.81	0.558365	0.73446	0.66051	0.62199	0.645027	0.732796	0.649729	0.765484	0.684395	0.899262	0.610454	0.687395	0.753092	0.549442	0.986171	0.723104	0.487801	0.846173	0.626879	0.578413	0.625539	0.883324	0.548289	0.541374	0.552369	0.715981	0.795881	0.78082	0.809006	0.819147	0.8438	0.782172	0.639668
TCGA-RL-AAAS-01A	CAFclusterA	1374.2	2085.81	3460	0.617708	0.761041	0.703075	0.779162	0.681152	0.904647	0.712601	0.914478	0.809401	0.932937	0.798759	0.813375	0.811681	0.884274	0.990338	0.768785	0.671596	0.872284	0.73312	0.689412	0.710788	0.958357	0.74662	0.630262	0.630446	0.814085	0.803539	0.821718	0.821984	0.857113	0.869506	0.798018	0.630101
TCGA-S4-A8RO-01A	CAFclusterA	196.093	857.157	1053.25	0.614326	0.755651	0.63081	0.568079	0.633055	0.689736	0.628461	0.721931	0.748069	0.920358	0.556693	0.636896	0.80463	0.527094	0.984096	0.716286	0.431274	0.859004	0.665741	0.611541	0.618643	0.921862	0.505425	0.515787	0.557863	0.696545	0.795335	0.816906	0.713919	0.807248	0.870111	0.776081	0.60093
TCGA-S4-A8RP-01A	CAFclusterA	825.122	1103.72	1928.85	0.548676	0.756486	0.666453	0.57106	0.649218	0.774154	0.650326	0.769613	0.778144	0.920269	0.66276	0.718545	0.813757	0.626591	0.989603	0.71684	0.495031	0.871113	0.624707	0.605056	0.616339	0.924269	0.513791	0.580821	0.549767	0.725283	0.798734	0.769486	0.778139	0.827386	0.874891	0.787856	0.632905
TCGA-US-A774-01A	CAFclusterA	1269.22	1498.72	2767.94	0.681335	0.794306	0.682149	0.716567	0.67037	0.781011	0.695473	0.833108	0.784837	0.932087	0.700582	0.767129	0.813556	0.745599	0.993209	0.751879	0.533465	0.878126	0.682009	0.669155	0.670754	0.935672	0.673919	0.621303	0.543501	0.776735	0.811598	0.827411	0.790537	0.842386	0.910923	0.811218	0.625511
TCGA-US-A776-01A	CAFclusterB	-1094.24	-326.212	-1420.45	0.411572	0.727995	0.540725	0.550986	0.580332	0.592601	0.560076	0.724385	0.542971	0.820099	0.342678	0.621941	0.659821	0.542417	0.986388	0.626126	0.592534	0.795502	0.592867	0.562891	0.497861	0.759857	0.457378	0.442222	0.347482	0.618138	0.745232	0.72362	0.68106	0.76241	0.664425	0.68138	0.578601
TCGA-US-A779-01A	CAFclusterB	-763.778	90.331	-673.447	0.51721	0.668706	0.60789	0.58939	0.608469	0.586912	0.593014	0.644204	0.619406	0.85881	0.504515	0.590735	0.773559	0.616338	0.965911	0.668602	0.333988	0.831737	0.59288	0.520539	0.573552	0.820424	0.486951	0.428481	0.456451	0.639665	0.768462	0.769507	0.746649	0.790325	0.748233	0.725665	0.639443
TCGA-US-A77E-01A	CAFclusterA	618.111	510.389	1128.5	0.541246	0.734498	0.662229	0.620941	0.622956	0.654116	0.611159	0.669294	0.641767	0.888251	0.396292	0.646093	0.800806	0.497657	0.995187	0.709453	0.457201	0.864831	0.620498	0.534847	0.552565	0.814126	0.573291	0.451199	0.465923	0.66647	0.782664	0.845852	0.742615	0.811173	0.910244	0.800182	0.617369
TCGA-US-A77G-01A	CAFclusterB	-862.347	279.958	-582.388	0.548465	0.69393	0.618434	0.565122	0.616415	0.62844	0.603727	0.689637	0.6888	0.869323	0.610735	0.615072	0.726223	0.570057	0.982788	0.685827	0.456958	0.858639	0.615302	0.550548	0.56542	0.823755	0.466316	0.463402	0.448426	0.669746	0.779615	0.844613	0.776991	0.792124	0.723347	0.696997	0.591019
TCGA-US-A77J-01A	CAFclusterB	1369.93	2669.76	4039.69	0.704656	0.782833	0.733514	0.875338	0.686218	0.85332	0.758967	0.886677	0.810382	0.958124	0.769446	0.797565	0.816065	0.708523	0.988531	0.787814	0.596008	0.85855	0.740692	0.765438	0.777913	0.970562	0.849217	0.678763	0.663442	0.860707	0.815914	0.773867	0.80644	0.865562	0.876609	0.790237	0.640229
TCGA-XD-AAUG-01A	CAFclusterA	1745.39	1072.68	2818.07	0.654357	0.735477	0.690374	0.645808	0.643699	0.765206	0.662531	0.762132	0.733534	0.913895	0.641319	0.666612	0.765934	0.742951	0.975054	0.744392	0.497688	0.836265	0.63284	0.630559	0.650989	0.929204	0.563622	0.557032	0.530439	0.739868	0.807096	0.740989	0.790674	0.826895	0.91672	0.828683	0.629424
TCGA-XD-AAUH-01A	CAFclusterB	1235.99	1995.67	3231.66	0.602397	0.749802	0.68246	0.825161	0.669966	0.87355	0.687837	0.869674	0.772956	0.917787	0.636257	0.745163	0.774125	0.781506	0.981584	0.761573	0.54946	0.851301	0.676078	0.679331	0.713067	0.942285	0.754099	0.607469	0.573637	0.829006	0.812258	0.743761	0.824797	0.850928	0.816362	0.792417	0.625391
TCGA-XD-AAUI-01A	CAFclusterA	653.831	1322.13	1975.96	0.589901	0.745628	0.704161	0.766561	0.670142	0.702306	0.699024	0.745665	0.790436	0.908901	0.6679	0.725495	0.811335	0.651508	0.98791	0.734772	0.519212	0.864946	0.630512	0.664461	0.695467	0.919236	0.747258	0.614483	0.546543	0.775419	0.813336	0.753135	0.803505	0.841576	0.870797	0.794076	0.621879
TCGA-XD-AAUL-01A	CAFclusterA	909.979	1192.34	2102.31	0.554107	0.750844	0.670629	0.562047	0.656135	0.671476	0.657498	0.72331	0.792063	0.912223	0.747225	0.643703	0.8048	0.646245	0.98921	0.74314	0.559221	0.859375	0.643088	0.610668	0.615275	0.923831	0.480808	0.524132	0.571505	0.719234	0.79875	0.834391	0.75147	0.823051	0.888466	0.804134	0.620868
TCGA-XN-A8T3-01A	CAFclusterA	855.214	951.05	1806.26	0.514705	0.785798	0.686155	0.560025	0.62485	0.824654	0.662962	0.840663	0.640721	0.906193	0.554949	0.713058	0.806067	0.594506	0.991186	0.701805	0.562713	0.843599	0.650049	0.625703	0.635103	0.911261	0.417658	0.524255	0.508438	0.71873	0.788904	0.781678	0.758916	0.814076	0.867581	0.80258	0.636646
TCGA-XN-A8T5-01A	CAFclusterA	1308.5	2126.77	3435.27	0.638107	0.760675	0.701816	0.850271	0.668303	0.884977	0.714368	0.882051	0.747365	0.929795	0.646885	0.770877	0.759132	0.803359	0.989322	0.748936	0.575485	0.861869	0.715993	0.685528	0.740235	0.932317	0.79597	0.627327	0.623033	0.840121	0.814536	0.812187	0.862211	0.86326	0.820554	0.815864	0.584162
TCGA-YB-A89D-01A	CAFclusterA	1478.63	1444.42	2923.04	0.66748	0.797988	0.716336	0.601127	0.681345	0.710378	0.69951	0.775501	0.871564	0.922196	0.794941	0.676248	0.821502	0.647196	0.985019	0.744639	0.52107	0.881474	0.647117	0.647266	0.69502	0.950674	0.528621	0.586774	0.55894	0.747859	0.821696	0.838099	0.781693	0.836007	0.931421	0.823762	0.643067
TCGA-YH-A8SY-01A	CAFclusterA	1296.19	866.764	2162.95	0.602659	0.791665	0.693136	0.565794	0.651881	0.622264	0.670829	0.764705	0.759312	0.910042	0.605952	0.67318	0.795382	0.553963	0.989835	0.708801	0.434884	0.876659	0.614845	0.617373	0.654137	0.885439	0.447016	0.532249	0.568081	0.690951	0.801544	0.870136	0.706732	0.805534	0.944983	0.824777	0.577081
TCGA-YY-A8LH-01A	CAFclusterA	-929.884	278.627	-651.257	0.644083	0.732012	0.656243	0.602718	0.625648	0.699218	0.626056	0.748253	0.661067	0.87952	0.619077	0.658547	0.714818	0.574062	0.993687	0.661357	0.448748	0.879798	0.610963	0.574444	0.607891	0.806078	0.59097	0.519522	0.577072	0.681208	0.78743	0.865719	0.746038	0.796474	0.771024	0.722534	0.611375

## Sheet: Table S6
drug	pvalue
EHT.1864	2.75e-08
PD.173074	4.99e-07
Nutlin.3a	1.93e-06
AZD8055	9.73e-06
AMG.706	1.28e-05
Axitinib	1.92e-05
ZM.447439	3.38e-05
CEP.701	3.43e-05
Temsirolimus	4.63e-05
NU.7441	5.26e-05
NVP.BEZ235	0.000122774
MK.2206	0.00022705
PD.0332991	0.000296495
WO2009093972	0.000357697
Vorinostat	0.000414898
AZD.2281	0.000452072
GDC0941	0.000548928
CCT007093	0.00155307
GDC.0449	0.00167773
BI.D1870	0.0017339
TW.37	0.00185139
AG.014699	0.00382703
BX.795	0.00547788
X681640	0.00639606
Elesclomol	0.0071039
GSK269962A	0.00744789
BMS.708163	0.00849033

## Sheet: Table S7
drug	pvalue
Pyrimethamine	1.38e-05
BIBW2992	3.58e-05
A.443654	8.3e-05
RDEA119	0.000175303
BI.2536	0.000353277
Lapatinib	0.000680629
Bicalutamide	0.000722074
WZ.1.84	0.00114736
FTI.277	0.00135885
GW843682X	0.00342036
JW.7.52.1	0.00615457
S.Trityl.L.cysteine	0.00744789
GSK.650394	0.00810418
Sorafenib	0.00841183
AKT.inhibitor.VIII	0.00992657
